# Supplementary material for: Identification of Genes Critical for Resistance to Infection by West Nile Virus Using RNA-Seq Analysis
Source: MDPI journal article supplement (doi:10.3390/v5071664), 2013-07-08
Supplement: s1 [file s1]

**Table S1 RNA-Seq Subject mapping summary**

| Sample             | Total_filtered_reads | Tophat_mapped_reads | Unique_hits | #{2 hits) | #{>2 hits) | Splice_alignments | Map_percentage |
|--------------------|----------------------|---------------------|-------------|-----------|------------|-------------------|----------------|
| Subject1 mock      | 29922477             | 26773755            | 21142047    | 2306561   | 3325147    | 2806037           | 89.48%         |
| Subject2 mock      | 29996610             | 25700116            | 20509594    | 2123347   | 3067175    | 2680850           | 85.68%         |
| Subject3 mock      | 29676563             | 26254698            | 20737318    | 2225931   | 3291449    | 2740810           | 88.47%         |
| Subject4 mock      | 25817531             | 20729674            | 16083833    | 1883729   | 2762112    | 2120403           | 80.29%         |
| Subject5 mock      | 26965296             | 24405800            | 19486598    | 1920550   | 2998652    | 2535653           | 90.51%         |
| Subject6 mock      | 26900450             | 24057866            | 19045097    | 1980317   | 3032452    | 2470119           | 89.43%         |
| Subject7 mock      | 27023417             | 22863435            | 17918320    | 1921850   | 3023265    | 2554503           | 84.61%         |
| Subject8 mock      | 30954809             | 27646983            | 22586755    | 2005423   | 3054805    | 2827679           | 89.31%         |
| Subject9 mock      | 30034811             | 27651798            | 23394336    | 1742483   | 2514979    | 2675800           | 92.07%         |
| Subject10 mock     | 29084544             | 25752069            | 21449731    | 1747538   | 2554800    | 2684162           | 88.54%         |
| Subject1 infected  | 31423035             | 29234002            | 24539712    | 1870818   | 2823472    | 3005014           | 93.03%         |
| Subject2 infected  | 26606088             | 22577040            | 18339803    | 1656295   | 2580942    | 2452830           | 84.86%         |
| Subject3 infected  | 28869391             | 27125200            | 22238152    | 1966117   | 2920931    | 2792203           | 93.96%         |
| Subject4 infected  | 30178658             | 26639669            | 21573294    | 1989027   | 3077348    | 2825635           | 88.27%         |
| Subject5 infected  | 30064035             | 27494737            | 22516790    | 1974384   | 3003563    | 2765992           | 91.45%         |
| Subject6 infected  | 29003531             | 26632199            | 21878939    | 1868949   | 2884311    | 2813084           | 91.82%         |
| Subject7 infected  | 29775059             | 24127800            | 19461319    | 1824800   | 2841681    | 2648383           | 81.03%         |
| Subject8 infected  | 26245391             | 22220813            | 18020732    | 1608350   | 2591731    | 2418831           | 84.67%         |
| Subject9 infected  | 22694314             | 20705016            | 17778532    | 1150971   | 1775513    | 2003159           | 91.23%         |
| Subject10 infected | 25723307             | 22441808            | 19070864    | 1345836   | 2025108    | 2257434           | 87.24%         |
