# Supplementary material for: Identification of Genes Critical for Resistance to Infection by West Nile Virus Using RNA-Seq Analysis
Source: MDPI journal article supplement (doi:10.3390/v5071664), 2013-07-08
Supplement: s1 [file s1]

**Table S4. Annotated differentially expressed HRF and HSF**

| Ensembl.Gene.ID | Assoc.Gene.Name | Description                                                                     | Ensembl.Transcript.ID | Associated.Transcript.Name | log2 fold change |
|-----------------|-----------------|---------------------------------------------------------------------------------|-----------------------|----------------------------|------------------|
| ENSG00000141837 | CACNA1A         | calcium channel, voltage-dependent, P/Q type, alpha 1A subunit                  | ENST00000357018       | CACNA1A-202                | 4.736            |
| ENSG00000173786 | CNP             | 2',3'-cyclic nucleotide 3' phosphodiesterase                                    | ENST00000393888       | CNP-002                    | 2.521            |
| ENSG00000196371 | FUT4            | fucosyltransferase 4 (alpha (1,3) fucosyltransferase, myeloid-specific)         | ENST00000358752       | FUT4-201                   | 2.993            |
| ENSG00000104951 | IL4I1           | interleukin 4 induced 1                                                         | ENST00000391826       | IL4I1-203                  | 4.799            |
| ENSG00000160932 | LY6E            | lymphocyte antigen 6 complex, locus E                                           | ENST00000292494       | LY6E-201                   | 2.836            |
| ENSG00000160932 | LY6E            | lymphocyte antigen 6 complex, locus E                                           | ENST00000429120       | LY6E-202                   | 2.64             |
| ENSG00000140807 | NKD1            | naked cuticle homolog 1 (Drosophila)                                            | ENST00000268459       | NKD1-001                   | 2.744            |
| ENSG00000105559 | PLEKHA4         | pleckstrin homology domain containing, family A (phosphoinositide binding site) | ENST00000263265       | PLEKHA4-201                | 8.027            |
| ENSG00000130300 | PLVAP           | plasmalemma vesicle associated protein                                          | ENST00000252590       | PLVAP-201                  | 2.83             |
| ENSG00000167653 | PSCA            | prostate stem cell antigen                                                      | ENST00000301258       | PSCA-201                   | -3.053           |
| ENSG00000006747 | SCIN            | scinderin                                                                       | ENST00000297029       | SCIN-001                   | 3.2              |
| ENSG00000006747 | SCIN            | scinderin                                                                       | ENST00000445618       | SCIN-201                   | 2.583            |
| ENSG00000156398 | SFXN2           | sideroflexin 2                                                                  | ENST00000459894       | SFXN2-002                  | -2.551           |
| ENSG00000067066 | SP100           | SP100 nuclear antigen                                                           | ENST00000409341       | SP100-006                  | 2.857            |
| ENSG00000067066 | SP100           | SP100 nuclear antigen                                                           | ENST00000494901       | SP100-007                  | 2.524            |
| ENSG00000067066 | SP100           | SP100 nuclear antigen                                                           | ENST00000413284       | SP100-016                  | 2.444            |
| ENSG00000102524 | TNFSF13B        | tumor necrosis factor (ligand) superfamily, member 13b                          | ENST00000375887       | TNFSF13B-001               | 4.924            |
| ENSG00000102524 | TNFSF13B        | tumor necrosis factor (ligand) superfamily, member 13b                          | ENST00000493765       | TNFSF13B-004               | 2.882            |

**HRF**

| Ensembl.Gene.ID | Assoc.Gene.Name | Description                        | Ensembl.Transcript.ID | Associated.Transcript.Name | log2 fold change |
|-----------------|-----------------|------------------------------------|-----------------------|----------------------------|------------------|
| ENSG00000128512 | DOCK4           | dedicator of cytokinesis 4         | ENST00000423057       | DOCK4-007                  | 2.068            |
| ENSG00000160460 | SPTBN4          | spectrin, beta, non-erythrocytic 4 | ENST00000352632       | SPTBN4-203                 | -2.735           |
