# Supplementary material for: Identification of Genes Critical for Resistance to Infection by West Nile Virus Using RNA-Seq Analysis
Source: MDPI journal article supplement (doi:10.3390/v5071664), 2013-07-08
Supplement: s1 [file s1]

**Table S3. Differentially expressed transcripts in WNV infected macrophages**

| Ensembl.Transcript.ID | Transcript.Name | Ensembl.Gene.ID | Gene.Name     | Fold change estimated |      |
|-----------------------|-----------------|-----------------|---------------|-----------------------|------|
|                       |                 |                 |               | log2 fold change      | SD   |
| ENST00000479361       | C1orf170-002    | ENSG00000187642 | C1orf170      | 3.91                  | 1.94 |
| ENST00000304952       | HES4-001        | ENSG00000188290 | HES4          | 6.66                  | 2.04 |
| ENST00000379389       | ISG15-001       | ENSG00000187608 | ISG15         | 7.85                  | 1.00 |
| ENST00000378625       | NADK-001        | ENSG00000008130 | NADK          | 2.13                  | 0.53 |
| ENST00000471840       | MMEL1-002       | ENSG00000142606 | MMEL1         | -2.97                 | 3.10 |
| ENST00000481789       | KCNAB2-011      | ENSG00000069424 | KCNAB2        | -2.43                 | 3.82 |
| ENST00000377507       | TNFRSF9-001     | ENSG00000049249 | TNFRSF9       | 4.14                  | 0.87 |
| ENST00000294435       | RBP7-001        | ENSG00000162444 | RBP7          | -5.15                 | 1.59 |
| ENST00000447850       | CASZ1-003       | ENSG00000130940 | CASZ1         | 2.64                  | 4.20 |
| ENST00000476357       | C1orf127-002    | ENSG00000175262 | C1orf127      | -3.21                 | 1.77 |
| ENST00000377008       | C1orf127-001    | ENSG00000175262 | C1orf127      | -3.92                 | 1.90 |
| ENST00000376753       | FBXO6-001       | ENSG00000116663 | FBXO6         | 3.66                  | 0.54 |
| ENST00000449067       | FBXO6-003       | ENSG00000116663 | FBXO6         | 2.90                  | 0.40 |
| ENST00000476309       | AGTRAP-006      | ENSG00000177674 | AGTRAP        | 2.81                  | 3.85 |
| ENST00000413146       | TNFRSF8-202     | ENSG00000120949 | TNFRSF8       | -3.74                 | 1.77 |
| ENST00000416696       | RP5-888M10-001  | ENSG00000229484 | RP5-888M10.1  | -3.16                 | 0.97 |
| ENST00000375408       | ARHGEF10L-002   | ENSG00000074964 | ARHGEF10L     | 2.50                  | 3.61 |
| ENST00000375071       | CDA-001         | ENSG00000158825 | CDA           | -2.86                 | 1.35 |
| ENST00000461985       | CDA-002         | ENSG00000158825 | CDA           | -3.16                 | 2.21 |
| ENST00000400490       | PINK1-003       | ENSG00000158828 | PINK1         | -2.42                 | 0.98 |
| ENST00000400191       | EPHB2-001       | ENSG00000133216 | EPHB2         | 2.10                  | 3.86 |
| ENST00000500280       | AL021154-201    | ENSG00000246830 | AL021154.6    | -3.52                 | 1.39 |
| ENST00000361729       | E2F2-001        | ENSG00000007968 | E2F2          | -2.90                 | 1.72 |
| ENST00000463312       | ID3-003         | ENSG00000117318 | ID3           | -2.77                 | 3.75 |
| ENST00000374292       | STMN1-006       | ENSG00000117632 | STMN1         | -4.02                 | 2.24 |
| ENST00000374291       | STMN1-005       | ENSG00000117632 | STMN1         | -2.99                 | 0.95 |
| ENST00000502226       | AL033528-201    | ENSG00000247440 | AL033528.1    | -4.33                 | 1.81 |
| ENST00000430292       | PIGV-003        | ENSG00000060642 | PIGV          | 2.26                  | 2.86 |
| ENST00000361157       | IFI6-001        | ENSG00000126709 | IFI6          | 3.33                  | 0.56 |
| ENST00000373961       | IFI6-202        | ENSG00000126709 | IFI6          | 3.58                  | 0.83 |
| ENST00000481487       | FNDC5-003       | ENSG00000160097 | FNDC5         | -2.95                 | 1.98 |
| ENST00000291421       | FNDC5-201       | ENSG00000160097 | FNDC5         | -3.51                 | 2.40 |
| ENST00000401899       | RNF19B-202      | ENSG00000116514 | RNF19B        | 4.02                  | 3.30 |
| ENST00000235150       | RNF19B-002      | ENSG00000116514 | RNF19B        | 3.33                  | 0.15 |
| ENST00000373087       | ZC3H12A-001     | ENSG00000163874 | ZC3H12A       | 3.02                  | 0.71 |
| ENST00000492829       | ZC3H12A-003     | ENSG00000163874 | ZC3H12A       | 2.37                  | 0.74 |
| ENST00000472312       | ZC3H12A-004     | ENSG00000163874 | ZC3H12A       | 3.01                  | 2.48 |
| ENST00000501995       | AL139158-201    | ENSG00000244884 | AL139158.1    | -3.14                 | 1.27 |
| ENST00000371761       | CDKN2C-002      | ENSG00000123080 | CDKN2C        | 2.30                  | 2.00 |
| ENST00000488036       | SLC1A7-003      | ENSG00000162383 | SLC1A7        | -2.61                 | 1.42 |
| ENST00000498228       | ACOT11-004      | ENSG00000162390 | ACOT11        | -2.51                 | 2.15 |
| ENST00000371316       | ACOT11-001      | ENSG00000162390 | ACOT11        | -2.76                 | 0.72 |
| ENST00000302250       | FAM151A-001     | ENSG00000162391 | FAM151A       | -3.56                 | 2.40 |
| ENST00000416119       | RP11-240D10-001 | ENSG00000230728 | RP11-240D10.1 | -3.17                 | 1.15 |
| ENST00000357977       | NFIA-008        | ENSG00000162599 | NFIA          | -2.40                 | 0.81 |
| ENST00000329654       | PDE4B-001       | ENSG00000184588 | PDE4B         | 6.13                  | 2.01 |
| ENST00000480732       | NEXN-004        | ENSG00000162614 | NEXN          | 3.16                  | 2.18 |
| ENST00000370763       | DNAJB4-001      | ENSG00000162616 | DNAJB4        | 2.82                  | 0.81 |
| ENST00000370747       | IFI44-001       | ENSG00000137965 | IFI44         | 6.52                  | 1.99 |
| ENST00000485662       | IFI44-007       | ENSG00000137965 | IFI44         | 4.75                  | 0.92 |
| ENST00000284027       | MCOLN2-001      | ENSG00000153898 | MCOLN2        | 5.83                  | 2.39 |
| ENST00000489444       | GBP3-002        | ENSG00000117226 | GBP3          | 4.62                  | 2.91 |
| ENST00000461384       | GBP3-007        | ENSG00000117226 | GBP3          | 4.39                  | 1.85 |
| ENST00000498904       | AL160008-201    | ENSG00000247275 | AL160008.2    | 4.57                  | 1.48 |
| ENST00000370473       | GBP1-001        | ENSG00000117228 | GBP1          | 5.91                  | 0.82 |
| ENST00000370466       | GBP2-002        | ENSG00000162645 | GBP2          | 3.43                  | 2.83 |
| ENST00000493802       | GBP2-004        | ENSG00000162645 | GBP2          | 2.67                  | 0.70 |
| ENST00000355754       | GBP4-001        | ENSG00000162654 | GBP4          | 7.97                  | 0.98 |
| ENST00000481397       | GBP4-002        | ENSG00000162654 | GBP4          | 7.37                  | 5.46 |
| ENST00000370459       | GBP5-001        | ENSG00000154451 | GBP5          | 6.59                  | 1.53 |
| ENST00000394662       | RP4-644F6-001   | ENSG00000225492 | RP4-644F6.2   | 6.50                  | 0.35 |
| ENST00000500375       | AL355145-201    | ENSG00000246743 | AL355145.1    | -2.94                 | 2.17 |
| ENST00000485317       | KCNA2-002       | ENSG00000177301 | KCNA2         | -3.02                 | 1.24 |
| ENST00000241356       | ADORA3-010      | ENSG00000121933 | ADORA3        | -3.61                 | 1.20 |
| ENST00000357260       | C1orf183-001    | ENSG00000197852 | C1orf183      | -2.76                 | 0.55 |
| ENST00000369645       | MOV10-006       | ENSG00000155363 | MOV10         | 2.52                  | 0.68 |
| ENST00000468624       | MOV10-007       | ENSG00000155363 | MOV10         | 2.81                  | 0.32 |
| ENST00000357443       | MOV10-005       | ENSG00000155363 | MOV10         | 3.82                  | 3.74 |

|                 |                 |                 |               |       |      |
|-----------------|-----------------|-----------------|---------------|-------|------|
| ENST00000421943 | RP11-426L16-001 | ENSG00000225075 | RP11-426L16.3 | 2.57  | 1.48 |
| ENST00000393203 | PTGFRN-001      | ENSG00000134247 | PTGFRN        | -3.21 | 0.93 |
| ENST00000369448 | FAM46C-001      | ENSG00000183508 | FAM46C        | 2.33  | 1.35 |
| ENST00000401014 | NBPF7-201       | ENSG00000215864 | NBPF7         | 3.17  | 1.25 |
| ENST00000480765 | FAM72B-007      | ENSG00000188610 | FAM72B        | 2.10  | 0.53 |
| ENST00000369390 | FAM72B-001      | ENSG00000188610 | FAM72B        | 3.13  | 2.23 |
| ENST00000437515 | AL358175-002    | ENSG00000230806 | AL358175.1    | 2.50  | 0.91 |
| ENST00000304465 | SRGAP2P1-001    | ENSG00000171943 | SRGAP2P1      | 2.75  | 0.98 |
| ENST00000417218 | AL592494-001    | ENSG00000227082 | AL592494.3    | 2.83  | 0.92 |
| ENST00000432384 | BX284650-006    | ENSG00000231734 | BX284650.6    | 2.13  | 1.21 |
| ENST00000400889 | FAM72D-001      | ENSG00000215784 | FAM72D        | 2.82  | 0.35 |
| ENST00000467933 | SRGAP2P2-002    | ENSG00000196369 | SRGAP2P2      | 2.28  | 0.24 |
| ENST00000491897 | SRGAP2P2-001    | ENSG00000196369 | SRGAP2P2      | 2.97  | 3.84 |
| ENST00000442509 | AL592284-003    | ENSG00000236943 | AL592284.2    | 2.31  | 0.76 |
| ENST00000369304 | ITGA10-001      | ENSG00000143127 | ITGA10        | 2.55  | 0.88 |
| ENST00000438469 | RP11-325P15-001 | ENSG00000230832 | RP11-325P15.2 | 2.70  | 0.57 |
| ENST00000443058 | RP11-325P15-201 | ENSG00000230832 | RP11-325P15.2 | 2.34  | 0.42 |
| ENST00000271348 | GJA5-201        | ENSG00000143140 | GJA5          | -2.99 | 1.63 |
| ENST00000445243 | RP11-495P10-001 | ENSG00000231551 | RP11-495P10.5 | 2.23  | 1.37 |
| ENST00000452637 | RP11-403I13-001 | ENSG00000226067 | RP11-403I13.7 | 2.46  | 0.76 |
| ENST00000433084 | RP11-403I13-001 | ENSG00000235999 | RP11-403I13.6 | 2.42  | 0.37 |
| ENST00000369175 | FAM72C-001      | ENSG00000203817 | FAM72C        | 3.02  | 0.56 |
| ENST00000443602 | RP11-353N4-001  | ENSG00000223759 | RP11-353N4.4  | 2.38  | 0.45 |
| ENST00000369173 | AL358813-201    | ENSG00000203815 | AL358813.2    | 2.72  | 0.90 |
| ENST00000359348 | AL358813-201    | ENSG00000197844 | AL358813.5    | 2.20  | 0.84 |
| ENST00000369167 | HIST2H2BF-001   | ENSG00000203814 | HIST2H2BF     | 2.52  | 0.77 |
| ENST00000392939 | HIST2H4A-003    | ENSG00000183941 | HIST2H4A      | 2.77  | 0.58 |
| ENST00000369165 | HIST2H4A-001    | ENSG00000183941 | HIST2H4A      | 2.99  | 1.11 |
| ENST00000369158 | HIST2H3C-001    | ENSG00000203811 | HIST2H3C      | 3.61  | 0.70 |
| ENST00000369161 | HIST2H2AA3-001  | ENSG00000183558 | HIST2H2AA3    | 3.39  | 0.71 |
| ENST00000369159 | HIST2H2AA4-001  | ENSG00000203812 | HIST2H2AA4    | 3.42  | 0.71 |
| ENST00000403683 | HIST2H3A-001    | ENSG00000203852 | HIST2H3A      | 3.63  | 0.72 |
| ENST00000369157 | HIST2H4B-001    | ENSG00000182217 | HIST2H4B      | 2.95  | 1.37 |
| ENST00000392932 | HIST2H4B-003    | ENSG00000182217 | HIST2H4B      | 2.72  | 0.59 |
| ENST00000369155 | HIST2H2BE-001   | ENSG00000184678 | HIST2H2BE     | 2.82  | 0.54 |
| ENST00000331380 | HIST2H2AC-001   | ENSG00000184260 | HIST2H2AC     | 3.11  | 0.74 |
| ENST00000369146 | SV2A-001        | ENSG00000159164 | SV2A          | 2.98  | 2.08 |
| ENST00000369026 | MCL1-001        | ENSG00000143384 | MCL1          | 2.49  | 0.93 |
| ENST00000439749 | MCL1-201        | ENSG00000143384 | MCL1          | 2.19  | 1.14 |
| ENST00000368947 | ANXA9-001       | ENSG00000143412 | ANXA9         | -2.94 | 1.89 |
| ENST00000368732 | S100A8-002      | ENSG00000143546 | S100A8        | 2.53  | 3.71 |
| ENST00000368714 | S100A4-006      | ENSG00000196154 | S100A4        | -2.23 | 0.74 |
| ENST00000368476 | CHRNA2-001      | ENSG00000160716 | CHRNA2        | 2.43  | 0.45 |
| ENST00000368471 | ADAR-002        | ENSG00000160710 | ADAR          | 2.40  | 0.70 |
| ENST00000355014 | SEMA4A-002      | ENSG00000196189 | SEMA4A        | 3.33  | 0.76 |
| ENST00000470306 | SEMA4A-005      | ENSG00000196189 | SEMA4A        | 2.88  | 3.20 |
| ENST00000361170 | IQGAP3-001      | ENSG00000183856 | IQGAP3        | -2.80 | 0.68 |
| ENST00000413909 | ARHGEF11-202    | ENSG00000132694 | ARHGEF11      | 2.87  | 3.80 |
| ENST00000368174 | CD5L-001        | ENSG00000073754 | CD5L          | 3.08  | 0.82 |
| ENST00000368131 | IFI16-001       | ENSG00000163565 | IFI16         | 2.81  | 4.23 |
| ENST00000295809 | IFI16-201       | ENSG00000163565 | IFI16         | 2.56  | 0.59 |
| ENST00000443928 | RP11-404F10-001 | ENSG00000228863 | RP11-404F10.1 | 2.59  | 1.98 |
| ENST00000499766 | AL121985-201    | ENSG00000247153 | AL121985.1    | 2.76  | 1.97 |
| ENST00000368046 | CD48-001        | ENSG00000117091 | CD48          | 2.18  | 0.33 |
| ENST00000368042 | SLAMF7-003      | ENSG00000026751 | SLAMF7        | 3.03  | 6.19 |
| ENST00000484221 | SLAMF7-004      | ENSG00000026751 | SLAMF7        | 4.04  | 5.72 |
| ENST00000367838 | GPR161-002      | ENSG00000143147 | GPR161        | 2.17  | 3.12 |
| ENST00000329281 | BLZF1-002       | ENSG00000117475 | BLZF1         | 2.89  | 0.56 |
| ENST00000367808 | BLZF1-001       | ENSG00000117475 | BLZF1         | 3.24  | 0.79 |
| ENST00000236147 | SELL-001        | ENSG00000188404 | SELL          | 3.50  | 0.56 |
| ENST00000239468 | TNFSF18-201     | ENSG00000120337 | TNFSF18       | 5.25  | 1.51 |
| ENST00000489615 | RABGAP1L-006    | ENSG00000152061 | RABGAP1L      | 2.71  | 4.38 |
| ENST00000478442 | RABGAP1L-010    | ENSG00000152061 | RABGAP1L      | 4.76  | 2.68 |
| ENST00000437695 | RP5-1141O19-001 | ENSG00000227085 | RP5-1141O19.1 | 3.60  | 0.66 |
| ENST00000367511 | FAM129A-001     | ENSG00000135842 | FAM129A       | 3.41  | 4.20 |
| ENST00000500715 | AL356273-201    | ENSG00000247183 | AL356273.4    | -3.40 | 3.19 |
| ENST00000367468 | PTGS2-001       | ENSG00000073756 | PTGS2         | 6.44  | 1.63 |
| ENST00000367436 | CDC73-201       | ENSG00000134371 | CDC73         | 2.39  | 3.86 |
| ENST00000309502 | ADORA1-002      | ENSG00000163485 | ADORA1        | -3.57 | 1.60 |
| ENST00000391949 | PIK3C2B-201     | ENSG00000133056 | PIK3C2B       | -2.47 | 3.39 |
| ENST00000367128 | FAM72A-001      | ENSG00000196550 | FAM72A        | 3.08  | 2.00 |

|                 |                 |                 |               |       |      |
|-----------------|-----------------|-----------------|---------------|-------|------|
| ENST00000295713 | SRGAP2-001      | ENSG00000163486 | SRGAP2        | 2.43  | 3.15 |
| ENST00000419187 | SRGAP2-204      | ENSG00000163486 | SRGAP2        | 2.73  | 0.88 |
| ENST00000467419 | SRGAP2-003      | ENSG00000163486 | SRGAP2        | 2.80  | 2.04 |
| ENST00000488049 | SRGAP2-006      | ENSG00000163486 | SRGAP2        | 2.21  | 0.49 |
| ENST00000501119 | AL035209-201    | ENSG00000245296 | AL035209.1    | 2.19  | 0.44 |
| ENST00000367029 | G0S2-001        | ENSG00000123689 | G0S2          | 2.77  | 0.82 |
| ENST00000367021 | IRF6-001        | ENSG00000117595 | IRF6          | 2.13  | 1.62 |
| ENST00000446962 | RP11-338C15-001 | ENSG00000237980 | RP11-338C15.1 | 2.19  | 1.38 |
| ENST00000243440 | BATF3-001       | ENSG00000123685 | BATF3         | 3.48  | 1.31 |
| ENST00000478275 | BATF3-002       | ENSG00000123685 | BATF3         | 4.51  | 3.01 |
| ENST00000490299 | RPS6KC1-003     | ENSG00000136643 | RPS6KC1       | 2.27  | 2.31 |
| ENST00000407981 | MOSC1-002       | ENSG00000186205 | MOSC1         | -2.84 | 1.87 |
| ENST00000427693 | HLX-002         | ENSG00000136630 | HLX           | 2.37  | 5.04 |
| ENST00000344922 | MIA3-001        | ENSG00000154305 | MIA3          | 2.50  | 3.73 |
| ENST00000340535 | MIA3-005        | ENSG00000154305 | MIA3          | 2.45  | 1.49 |
| ENST00000456298 | FAM177B-005     | ENSG00000197520 | FAM177B       | 3.57  | 0.66 |
| ENST00000327449 | DUSP5P-201      | ENSG00000183929 | DUSP5P        | 2.85  | 0.92 |
| ENST00000493897 | ASB13-002       | ENSG00000196372 | ASB13         | -2.36 | 3.63 |
| ENST00000397250 | IL15RA-203      | ENSG00000134470 | IL15RA        | 6.70  | 1.61 |
| ENST00000379775 | PFKFB3-002      | ENSG00000170525 | PFKFB3        | 4.33  | 0.81 |
| ENST00000459607 | Y_RNA           | ENSG00000238366 | Y_RNA         | 2.26  | 1.62 |
| ENST00000277575 | USP6NL-201      | ENSG00000148429 | USP6NL        | 3.50  | 3.42 |
| ENST00000378757 | OPTN-007        | ENSG00000123240 | OPTN          | 2.30  | 5.66 |
| ENST00000424614 | OPTN-001        | ENSG00000123240 | OPTN          | 4.04  | 2.97 |
| ENST00000442900 | RP11-730A19-001 | ENSG00000228330 | RP11-730A19.6 | 2.36  | 1.08 |
| ENST00000426373 | RP11-108B14-001 | ENSG00000227462 | RP11-108B14.3 | 2.65  | 0.75 |
| ENST00000376495 | OTUD1-001       | ENSG00000165312 | OTUD1         | 3.42  | 1.00 |
| ENST00000477034 | MASTL-002       | ENSG00000120539 | MASTL         | 3.59  | 2.61 |
| ENST00000375321 | MAP3K8-003      | ENSG00000107968 | MAP3K8        | 2.62  | 4.00 |
| ENST00000473940 | CREM-003        | ENSG00000095794 | CREM          | 3.39  | 2.66 |
| ENST00000440465 | NAMPTL-001      | ENSG00000229644 | NAMPTL        | 3.13  | 0.91 |
| ENST00000355710 | RET-001         | ENSG00000165731 | RET           | 2.88  | 2.04 |
| ENST00000374429 | CXCL12-002      | ENSG00000107562 | CXCL12        | 4.18  | 1.19 |
| ENST00000343575 | CXCL12-001      | ENSG00000107562 | CXCL12        | 3.40  | 1.15 |
| ENST00000298295 | C10orf10-001    | ENSG00000165507 | C10orf10      | 2.31  | 5.26 |
| ENST00000489171 | RASSF4-002      | ENSG00000107551 | RASSF4        | 2.55  | 0.36 |
| ENST00000430188 | RP11-38L15-001  | ENSG00000231187 | RP11-38L15.3  | 2.06  | 0.18 |
| ENST00000422399 | CTSLL4-201      | ENSG00000230011 | CTSLL4        | 2.42  | 1.13 |
| ENST00000374007 | ASAH2B-002      | ENSG00000204147 | ASAH2B        | 3.86  | 0.70 |
| ENST00000373290 | TSPAN15-001     | ENSG00000099282 | TSPAN15       | -2.73 | 1.73 |
| ENST00000476605 | CBARA1-003      | ENSG00000107745 | CBARA1        | 2.71  | 2.65 |
| ENST00000456375 | RP11-165M8-003  | ENSG00000223820 | RP11-165M8.1  | 2.35  | 1.97 |
| ENST00000355740 | FAS-005         | ENSG00000026103 | FAS           | 3.22  | 3.25 |
| ENST00000371795 | IFIT5-001       | ENSG00000152778 | IFIT5         | 3.92  | 0.32 |
| ENST00000416601 | IFIT5-201       | ENSG00000152778 | IFIT5         | 5.33  | 4.40 |
| ENST00000463743 | MYOF-006        | ENSG00000138119 | MYOF          | 2.26  | 1.40 |
| ENST00000453258 | ENTPD1-005      | ENSG00000138185 | ENTPD1        | -2.68 | 2.46 |
| ENST00000224337 | BLNK-001        | ENSG00000095585 | BLNK          | 2.66  | 5.38 |
| ENST00000501877 | AL353719-201    | ENSG00000247504 | AL353719.1    | 2.58  | 0.68 |
| ENST00000497217 | SLC25A28-002    | ENSG00000155287 | SLC25A28      | 2.14  | 0.54 |
| ENST00000336486 | NFKB2-201       | ENSG00000077150 | NFKB2         | 2.06  | 0.98 |
| ENST00000467116 | NFKB2-002       | ENSG00000077150 | NFKB2         | 2.18  | 2.96 |
| ENST00000404739 | NT5C2-001       | ENSG00000076685 | NT5C2         | 2.37  | 1.21 |
| ENST00000393258 | RP11-332O19-201 | ENSG00000213277 | RP11-332O19.4 | 2.21  | 1.94 |
| ENST00000329905 | CALHM1-001      | ENSG00000185933 | CALHM1        | -2.72 | 1.55 |
| ENST00000435434 | RP11-127L20-001 | ENSG00000231233 | RP11-127L20.2 | 2.69  | 1.02 |
| ENST00000369583 | DUSP-001        | ENSG00000138166 | DUSP          | 3.10  | 0.49 |
| ENST00000442393 | CASP7-205       | ENSG00000165806 | CASP7         | 2.43  | 3.92 |
| ENST00000415217 | ADAM8-202       | ENSG00000151651 | ADAM8         | 2.26  | 0.53 |
| ENST00000399817 | IFITM2-202      | ENSG00000185201 | IFITM2        | 3.05  | 0.50 |
| ENST00000443559 | IFITM2-203      | ENSG00000185201 | IFITM2        | 4.74  | 0.90 |
| ENST00000327366 | IFITM2-201      | ENSG00000185201 | IFITM2        | 3.40  | 4.42 |
| ENST00000328221 | IFITM1-201      | ENSG00000185885 | IFITM1        | 8.11  | 1.29 |
| ENST00000399808 | IFITM3-202      | ENSG00000142089 | IFITM3        | 5.49  | 0.87 |
| ENST00000452428 | IFITM3-203      | ENSG00000142089 | IFITM3        | 5.61  | 0.68 |
| ENST00000469048 | IRF7-004        | ENSG00000185507 | IRF7          | 5.23  | 0.98 |
| ENST00000331588 | DUSP8-201       | ENSG00000184545 | DUSP8         | 2.29  | 1.13 |
| ENST00000381395 | IGF2-003        | ENSG00000167244 | IGF2          | 4.37  | 1.45 |
| ENST00000331289 | ASCL2-001       | ENSG00000183734 | ASCL2         | 3.58  | 0.67 |
| ENST00000501274 | AC013791-201    | ENSG00000246000 | AC013791.1    | 2.11  | 0.86 |
| ENST00000471998 | OSBPL5-003      | ENSG00000021762 | OSBPL5        | 2.29  | 2.12 |

|                 |                 |                 |               |       |      |
|-----------------|-----------------|-----------------|---------------|-------|------|
| ENST00000416879 | AC010930-201    | ENSG00000225101 | AC010930.2    | 3.49  | 0.87 |
| ENST00000433961 | TRIM5-005       | ENSG00000132256 | TRIM5         | 3.58  | 0.86 |
| ENST00000379965 | TRIM22-001      | ENSG00000132274 | TRIM22        | 4.34  | 3.61 |
| ENST00000480395 | TRIM22-002      | ENSG00000132274 | TRIM22        | 4.30  | 0.61 |
| ENST00000414897 | TRIM22-007      | ENSG00000132274 | TRIM22        | 3.31  | 5.60 |
| ENST00000328194 | DENND5A-201     | ENSG00000184014 | DENND5A       | 2.66  | 0.82 |
| ENST00000278175 | ADM-201         | ENSG00000148926 | ADM           | 3.06  | 0.38 |
| ENST00000396553 | AMPD3-202       | ENSG00000133805 | AMPD3         | 3.17  | 2.85 |
| ENST00000396554 | AMPD3-203       | ENSG00000133805 | AMPD3         | 2.84  | 0.87 |
| ENST00000241051 | DEPDC7-201      | ENSG00000121690 | DEPDC7        | 2.71  | 1.41 |
| ENST00000298992 | ABTB2-201       | ENSG00000166016 | ABTB2         | 3.65  | 0.42 |
| ENST00000457912 | SMTNL1-202      | ENSG00000214872 | SMTNL1        | 4.18  | 1.69 |
| ENST00000395113 | UBE2L6-203      | ENSG00000156587 | UBE2L6        | 2.85  | 0.18 |
| ENST00000433668 | SERPING1-203    | ENSG00000149131 | SERPING1      | 4.53  | 0.62 |
| ENST00000361723 | FAM111A-201     | ENSG00000166801 | FAM111A       | 2.07  | 5.88 |
| ENST00000428532 | PATL1-202       | ENSG00000166889 | PATL1         | 2.38  | 5.97 |
| ENST00000300146 | PATL1-201       | ENSG00000166889 | PATL1         | 1.79  | 0.61 |
| ENST00000435054 | PATL1-203       | ENSG00000166889 | PATL1         | 2.85  | 3.36 |
| ENST00000323961 | MS4A6A-201      | ENSG00000110077 | MS4A6A        | -2.80 | 0.80 |
| ENST00000412309 | MS4A6A-202      | ENSG00000110077 | MS4A6A        | -2.78 | 1.01 |
| ENST00000354445 | RARRES3-202     | ENSG00000133321 | RARRES3       | 3.98  | 3.17 |
| ENST00000435842 | BATF2-202       | ENSG00000168062 | BATF2         | 6.07  | 2.47 |
| ENST00000301887 | BATF2-201       | ENSG00000168062 | BATF2         | 5.28  | 1.92 |
| ENST00000279249 | CDC42EP2-201    | ENSG00000149798 | CDC42EP2      | 3.75  | 0.85 |
| ENST00000312106 | CATSPER1-201    | ENSG00000175294 | CATSPER1      | -2.63 | 2.05 |
| ENST00000327259 | TMEM151A-201    | ENSG00000179292 | TMEM151A      | -2.68 | 1.28 |
| ENST00000357440 | SLC29A2-202     | ENSG00000174669 | SLC29A2       | -2.59 | 2.92 |
| ENST00000320740 | PELI3-201       | ENSG00000174516 | PELI3         | -2.92 | 3.23 |
| ENST00000309996 | SPTBN2-201      | ENSG00000173898 | SPTBN2        | -2.39 | 0.51 |
| ENST00000312390 | TBC1D10C-201    | ENSG00000175463 | TBC1D10C      | -2.67 | 0.70 |
| ENST00000309099 | MRGPRF-201      | ENSG00000172935 | MRGPRF        | -2.75 | 2.68 |
| ENST00000308946 | MYEOV-201       | ENSG00000172927 | MYEOV         | 2.64  | 1.19 |
| ENST00000321297 | ATG16L2-201     | ENSG00000168010 | ATG16L2       | -2.49 | 4.16 |
| ENST00000353172 | KCTD14-001      | ENSG00000151364 | KCTD14        | 4.57  | 1.31 |
| ENST00000309186 | FZD4-201        | ENSG00000174804 | FZD4          | 4.61  | 0.90 |
| ENST00000500319 | AP001528-201    | ENSG00000245350 | AP001528.2    | 3.35  | 1.48 |
| ENST00000227638 | PANX1-201       | ENSG00000110218 | PANX1         | 2.76  | 0.65 |
| ENST00000358752 | FUT4-201        | ENSG00000196371 | FUT4          | 2.99  | 0.44 |
| ENST00000446230 | PIWIL4-202      | ENSG00000134627 | PIWIL4        | 3.70  | 2.37 |
| ENST00000278505 | ENDOD1-201      | ENSG00000149218 | ENDOD1        | 3.26  | 0.46 |
| ENST00000331217 | MAML2-201       | ENSG00000184384 | MAML2         | 1.96  | 4.31 |
| ENST00000263464 | BIRC3-201       | ENSG00000203445 | BIRC3         | 3.34  | 0.54 |
| ENST00000398136 | TMEM123-202     | ENSG00000152558 | TMEM123       | 2.19  | 0.96 |
| ENST00000375735 | DYNC2H1-202     | ENSG00000187240 | DYNC2H1       | -2.56 | 1.35 |
| ENST00000260309 | CASP1-201       | ENSG00000137752 | CASP1         | 2.58  | 0.92 |
| ENST00000320578 | RAB39-201       | ENSG00000179331 | RAB39         | 2.98  | 0.91 |
| ENST00000481955 | RP11-361A21-001 | ENSG00000224776 | RP11-361A21.1 | 2.78  | 0.99 |
| ENST00000280350 | PIH1D2-201      | ENSG00000150773 | PIH1D2        | 3.17  | 1.92 |
| ENST00000260282 | FXVD6-201       | ENSG00000137726 | FXVD6         | 3.13  | 0.46 |
| ENST00000278940 | TMPRSS13-201    | ENSG00000137747 | TMPRSS13      | 4.26  | 2.21 |
| ENST00000227752 | IL10RA-201      | ENSG00000110324 | IL10RA        | 2.54  | 0.37 |
| ENST00000356289 | AMICA1-202      | ENSG00000160593 | AMICA1        | -4.23 | 0.77 |
| ENST00000499820 | AP000783-201    | ENSG00000245866 | AP000783.1    | 2.29  | 0.65 |
| ENST00000322282 | GRAMD1B-201     | ENSG00000023171 | GRAMD1B       | 2.96  | 1.82 |
| ENST00000450171 | GRAMD1B-202     | ENSG00000023171 | GRAMD1B       | 2.42  | 1.71 |
| ENST00000284292 | NRGN-201        | ENSG00000154146 | NRGN          | -2.65 | 5.59 |
| ENST00000326261 | IQSEC3-201      | ENSG00000120645 | IQSEC3        | 3.28  | 2.17 |
| ENST00000261405 | VWF-201         | ENSG00000110799 | VWF           | -2.38 | 0.47 |
| ENST00000406697 | C1S-001         | ENSG00000182326 | C1S           | 2.60  | 0.82 |
| ENST00000266542 | C1RL-201        | ENSG00000139178 | C1RL          | 3.86  | 1.62 |
| ENST00000382215 | AC233309-201    | ENSG00000205885 | AC233309.1    | 3.47  | 1.21 |
| ENST00000229307 | NANOG-201       | ENSG00000111704 | NANOG         | 2.71  | 1.72 |
| ENST00000307637 | C3AR1-201       | ENSG00000171860 | C3AR1         | 2.02  | 0.56 |
| ENST00000299663 | CLEC4E-201      | ENSG00000166523 | CLEC4E        | 4.37  | 0.85 |
| ENST00000501043 | AC023796-201    | ENSG00000245492 | AC023796.2    | -3.53 | 4.06 |
| ENST00000182377 | FAR2-201        | ENSG00000064763 | FAR2          | 2.44  | 0.63 |
| ENST00000453713 | AC023157-201    | ENSG00000223722 | AC023157.1    | 5.37  | 0.98 |
| ENST00000395360 | RAPGEF3-002     | ENSG00000079337 | RAPGEF3       | -2.54 | 1.13 |
| ENST00000309739 | RND1-201        | ENSG00000172602 | RND1          | 3.59  | 1.12 |
| ENST00000451096 | RHEBL1-203      | ENSG00000167550 | RHEBL1        | 3.74  | 1.64 |
| ENST00000420065 | RHEBL1-202      | ENSG00000167550 | RHEBL1        | 2.90  | 2.87 |

|                 |                 |                  |               |       |      |
|-----------------|-----------------|------------------|---------------|-------|------|
| ENST00000330553 | KRT79-201       | ENSG00000185640  | KRT79         | -2.77 | 0.60 |
| ENST00000301464 | IGFBP6-201      | ENSG00000167779  | IGFBP6        | 3.97  | 1.61 |
| ENST00000422257 | ITGB7-203       | ENSG00000139626  | ITGB7         | 2.63  | 2.00 |
| ENST00000267082 | ITGB7-201       | ENSG00000139626  | ITGB7         | 2.77  | 4.30 |
| ENST00000267015 | GPR84-201       | ENSG00000139572  | GPR84         | 2.86  | 0.33 |
| ENST00000228534 | IL23A-201       | ENSG00000110944  | IL23A         | 2.33  | 0.55 |
| ENST00000501134 | AC025574-201    | ENSG00000247899  | AC025574.1    | 3.30  | 0.89 |
| ENST00000314128 | STAT2-201       | ENSG00000170581  | STAT2         | 3.15  | 0.54 |
| ENST00000262031 | RBMS2-201       | ENSG00000076067  | RBMS2         | 2.34  | 0.34 |
| ENST00000300119 | MYO1A-001       | ENSG00000166866  | MYO1A         | 6.04  | 1.01 |
| ENST00000379391 | TMEM194A-202    | ENSG00000166881  | TMEM194A      | 3.77  | 3.06 |
| ENST00000228606 | CYP27B1-201     | ENSG00000111012  | CYP27B1       | 3.27  | 0.57 |
| ENST00000499481 | AC083805-201    | ENSG00000245651  | AC083805.1    | 5.57  | 1.87 |
| ENST00000440906 | HELB-202        | ENSG00000127311  | HELB          | 2.79  | 3.46 |
| ENST00000500831 | AC025423-201    | ENSG00000245062  | AC025423.2    | 2.58  | 2.09 |
| ENST00000258111 | KCNMB4-201      | ENSG00000135643  | KCNMB4        | -3.17 | 1.40 |
| ENST00000438169 | KRR1-202        | ENSG00000111615  | KRR1          | 2.39  | 2.65 |
| ENST00000501535 | AC025568-201    | ENSG00000245720  | AC025568.1    | -3.02 | 1.17 |
| ENST00000256015 | BTG1-201        | ENSG00000133639  | BTG1          | 2.52  | 0.26 |
| ENST00000393113 | AC073655-201    | ENSG00000213250  | AC073655.1    | 2.92  | 0.57 |
| ENST00000258534 | DRAM1-201       | ENSG00000136048  | DRAM1         | 2.41  | 0.40 |
| ENST00000337514 | IGF1-001        | ENSG00000017427  | IGF1          | -3.37 | 3.91 |
| ENST00000307046 | IGF1-002        | ENSG00000017427  | IGF1          | -3.02 | 1.54 |
| ENST00000425610 | SLC41A2-202     | ENSG00000136052  | SLC41A2       | 2.68  | 0.62 |
| ENST00000397689 | AC009729-201    | ENSG00000214163  | AC009729.1    | 6.94  | 0.52 |
| ENST00000478808 | USP30-004       | ENSG00000135093  | USP30         | 3.82  | 0.70 |
| ENST00000429628 | CUX2-203        | ENSG00000111249  | CUX2          | -3.28 | 1.08 |
| ENST00000423386 | AC137055-201    | ENSG00000238168  | AC137055.2    | 2.79  | 0.62 |
| ENST00000442119 | C12orf47-202    | ENSG00000234608  | C12orf47      | -2.51 | 4.94 |
| ENST00000412615 | TRAFD1-202      | ENSG00000135148  | TRAFD1        | 2.57  | 0.24 |
| ENST00000452357 | OAS1-205        | ENSG00000089127  | OAS1          | 3.74  | 0.49 |
| ENST00000202917 | OAS1-201        | ENSG00000089127  | OAS1          | 3.37  | 0.80 |
| ENST00000228928 | OAS3-201        | ENSG00000111331  | OAS3          | 5.14  | 0.51 |
| ENST00000342315 | OAS2-201        | ENSG00000111335  | OAS2          | 5.92  | 0.31 |
| ENST00000392583 | OAS2-202        | ENSG00000111335  | OAS2          | 6.72  | 0.97 |
| ENST00000449768 | OAS2-203        | ENSG00000111335  | OAS2          | 4.31  | 2.89 |
| ENST00000261729 | RASAL1-201      | ENSG00000111344  | RASAL1        | -2.95 | 3.44 |
| ENST00000257549 | SDS-201         | ENSG00000135094  | SDS           | 2.07  | 0.41 |
| ENST00000358150 | NCRNA00173-201  | ENSG00000196668  | NCRNA00173    | 2.67  | 1.92 |
| ENST00000335209 | TESC-201        | ENSG00000088992  | TESC          | -2.80 | 4.58 |
| ENST00000257570 | OASL-001        | ENSG00000135114  | OASL          | 9.53  | 0.90 |
| ENST00000261826 | P2RX7-201       | ENSG000000089041 | P2RX7         | 2.27  | 0.97 |
| ENST00000328880 | GPR109A-201     | ENSG00000182782  | GPR109A       | 5.07  | 1.38 |
| ENST00000253083 | HIP1R-201       | ENSG00000130787  | HIP1R         | 3.39  | 1.02 |
| ENST00000442028 | ABCB9-205       | ENSG00000150967  | ABCB9         | -3.34 | 3.88 |
| ENST00000501992 | AC122688-201    | ENSG00000245605  | AC122688.1    | -2.36 | 0.56 |
| ENST00000281703 | GLT1D1-201      | ENSG00000151948  | GLT1D1        | 2.42  | 3.39 |
| ENST00000261654 | GPR133-201      | ENSG00000111452  | GPR133        | -2.38 | 2.37 |
| ENST00000382848 | GJB2-001        | ENSG00000165474  | GJB2          | 3.36  | 1.01 |
| ENST00000409126 | SPATA13-011     | ENSG00000182957  | SPATA13       | 2.21  | 3.37 |
| ENST00000399762 | RNF6-202        | ENSG00000127870  | RNF6          | 2.64  | 5.57 |
| ENST00000241463 | RASL11A-001     | ENSG00000122035  | RASL11A       | -2.48 | 1.85 |
| ENST00000480803 | RASL11A-003     | ENSG00000122035  | RASL11A       | -2.63 | 1.82 |
| ENST00000475385 | SLC46A3-002     | ENSG00000139508  | SLC46A3       | -2.96 | 3.22 |
| ENST00000380152 | BRCA2-001       | ENSG00000139618  | BRCA2         | 2.09  | 0.65 |
| ENST00000470094 | BRCA2-002       | ENSG00000139618  | BRCA2         | 3.04  | 2.75 |
| ENST00000255465 | CCNA1-001       | ENSG00000133101  | CCNA1         | 4.38  | 3.15 |
| ENST00000313624 | EPSTI1-001      | ENSG00000133106  | EPSTI1        | 6.24  | 0.89 |
| ENST00000313640 | EPSTI1-003      | ENSG00000133106  | EPSTI1        | 7.16  | 0.51 |
| ENST00000261489 | TSC22D1-002     | ENSG00000102804  | TSC22D1       | 2.34  | 0.69 |
| ENST00000453033 | RP11-278A16-001 | ENSG00000225131  | RP11-278A16.1 | 2.96  | 0.52 |
| ENST00000496623 | PHF11-012       | ENSG00000136147  | PHF11         | 2.24  | 2.01 |
| ENST00000465045 | PHF11-011       | ENSG00000136147  | PHF11         | 2.60  | 5.65 |
| ENST00000488958 | PHF11-010       | ENSG00000136147  | PHF11         | 2.30  | 2.75 |
| ENST00000425106 | RP11-522F22-001 | ENSG00000223717  | RP11-522F22.1 | 2.19  | 0.81 |
| ENST00000376958 | GPR180-001      | ENSG00000152749  | GPR180        | 2.76  | 1.06 |
| ENST00000375887 | TNFSF13B-001    | ENSG00000102524  | TNFSF13B      | 4.92  | 0.52 |
| ENST00000493765 | TNFSF13B-004    | ENSG00000102524  | TNFSF13B      | 2.88  | 5.56 |
| ENST00000463102 | PCID2-018       | ENSG00000126226  | PCID2         | -2.43 | 2.71 |
| ENST00000450766 | GAS6-204        | ENSG00000183087  | GAS6          | -3.19 | 2.43 |
| ENST00000327773 | GAS6-001        | ENSG00000183087  | GAS6          | -3.10 | 2.71 |

|                 |              |                 |              |       |      |
|-----------------|--------------|-----------------|--------------|-------|------|
| ENST00000397532 | SLC7A7-002   | ENSG00000155465 | SLC7A7       | 2.23  | 4.45 |
| ENST00000311852 | MMP14-001    | ENSG00000157227 | MMP14        | 2.03  | 0.38 |
| ENST00000470718 | PSME1-004    | ENSG00000092010 | PSME1        | 2.24  | 0.59 |
| ENST00000396881 | PSME2-201    | ENSG00000100911 | PSME2        | 2.62  | 0.49 |
| ENST00000471700 | PSME2-003    | ENSG00000100911 | PSME2        | 2.97  | 0.73 |
| ENST00000396864 | IRF9-001     | ENSG00000213928 | IRF9         | 2.14  | 0.17 |
| ENST00000324076 | IRF9-002     | ENSG00000213928 | IRF9         | 2.93  | 3.35 |
| ENST00000447460 | REC8-202     | ENSG00000100918 | REC8         | 2.22  | 2.12 |
| ENST00000258807 | CIDEB-201    | ENSG00000136305 | CIDEB        | -3.36 | 1.54 |
| ENST00000267406 | CBLN3-201    | ENSG00000139899 | CBLN3        | 2.48  | 0.84 |
| ENST00000280979 | AKAP6-001    | ENSG00000151320 | AKAP6        | -2.97 | 1.62 |
| ENST00000358716 | BAZ1A-201    | ENSG00000198604 | BAZ1A        | 2.33  | 7.30 |
| ENST00000216797 | NFKBIA-001   | ENSG00000100906 | NFKBIA       | 2.88  | 0.59 |
| ENST00000500541 | AL117692-201 | ENSG00000247881 | AL117692.1   | 2.59  | 1.49 |
| ENST00000395834 | CDKL1-001    | ENSG00000100490 | CDKL1        | 3.35  | 1.61 |
| ENST00000335281 | GNG2-201     | ENSG00000186469 | GNG2         | -3.99 | 1.16 |
| ENST00000245457 | PTGER2-001   | ENSG00000125384 | PTGER2       | 3.49  | 0.54 |
| ENST00000305831 | SAMD4A-202   | ENSG0000020577  | SAMD4A       | 2.20  | 3.38 |
| ENST00000254299 | GCH1-001     | ENSG00000131979 | GCH1         | 6.63  | 2.25 |
| ENST00000394709 | HSPA2-001    | ENSG00000126803 | HSPA2        | 2.36  | 1.77 |
| ENST00000394691 | PLEKHG3-201  | ENSG00000126822 | PLEKHG3      | 3.68  | 2.49 |
| ENST00000471182 | PLEKHG3-002  | ENSG00000126822 | PLEKHG3      | 3.46  | 4.30 |
| ENST00000484731 | PLEKHG3-007  | ENSG00000126822 | PLEKHG3      | 3.03  | 3.43 |
| ENST00000389722 | SPTB-205     | ENSG00000070182 | SPTB         | 4.41  | 3.85 |
| ENST00000357461 | TMEM229B-201 | ENSG00000198133 | TMEM229B     | 5.34  | 0.51 |
| ENST00000334696 | ENTPD5-201   | ENSG00000187097 | ENTPD5       | 2.20  | 0.84 |
| ENST00000216484 | SPTLC2-201   | ENSG00000100596 | SPTLC2       | 2.29  | 0.51 |
| ENST00000298902 | IFI27-201    | ENSG00000165949 | IFI27        | 8.19  | 1.04 |
| ENST00000392908 | SLC25A29-003 | ENSG00000197119 | SLC25A29     | -2.47 | 0.81 |
| ENST00000358655 | WARS-203     | ENSG00000140105 | WARS         | 2.56  | 0.75 |
| ENST00000355338 | WARS-202     | ENSG00000140105 | WARS         | 3.66  | 4.88 |
| ENST00000392880 | WARS-204     | ENSG00000140105 | WARS         | 2.71  | 0.84 |
| ENST00000501384 | AL157871-201 | ENSG00000247574 | AL157871.2   | 2.62  | 1.78 |
| ENST00000380069 | C14orf73-201 | ENSG00000205436 | C14orf73     | 3.86  | 1.57 |
| ENST00000428256 | CKB-202      | ENSG00000166165 | CKB          | 5.72  | 3.89 |
| ENST00000329797 | GPR132-201   | ENSG00000183484 | GPR132       | 2.55  | 2.03 |
| ENST00000356865 | ATP10A-201   | ENSG00000206190 | ATP10A       | 3.54  | 0.92 |
| ENST00000356107 | TJP1-201     | ENSG00000104067 | TJP1         | 3.68  | 2.49 |
| ENST00000382688 | C15orf52-002 | ENSG00000188549 | C15orf52     | -2.70 | 1.22 |
| ENST00000338264 | TRIM69-001   | ENSG00000185880 | TRIM69       | 4.06  | 1.84 |
| ENST00000396650 | C15orf48-201 | ENSG00000166920 | C15orf48     | 3.77  | 0.63 |
| ENST00000344300 | C15orf48-001 | ENSG00000166920 | C15orf48     | 4.31  | 0.66 |
| ENST00000390185 | hsa-mir-147b | ENSG00000211519 | hsa-mir-147b | 2.84  | 4.37 |
| ENST00000261867 | SLC30A4-001  | ENSG00000104154 | SLC30A4      | 5.84  | 0.78 |
| ENST00000409454 | C15orf21-001 | ENSG00000179362 | C15orf21     | 5.18  | 0.65 |
| ENST00000490076 | CYP19A1-005  | ENSG00000137869 | CYP19A1      | 2.78  | 1.76 |
| ENST00000420301 | CYP19A1-203  | ENSG00000137869 | CYP19A1      | 3.83  | 1.35 |
| ENST00000499613 | AC066613-201 | ENSG00000247729 | AC066613.1   | 2.34  | 1.99 |
| ENST00000454181 | LYSMD2-201   | ENSG00000140280 | LYSMD2       | 4.04  | 1.04 |
| ENST00000499648 | AC009712-201 | ENSG00000247829 | AC009712.2   | 4.28  | 0.93 |
| ENST00000395135 | PML-202      | ENSG00000140464 | PML          | 3.88  | 0.80 |
| ENST00000435786 | PML-205      | ENSG00000140464 | PML          | 3.77  | 0.29 |
| ENST00000354026 | PML-004      | ENSG00000140464 | PML          | 3.29  | 0.79 |
| ENST00000268058 | PML-001      | ENSG00000140464 | PML          | 3.66  | 0.37 |
| ENST00000305428 | KIAA1024-201 | ENSG00000169330 | KIAA1024     | 2.38  | 2.27 |
| ENST00000500393 | AC015871-201 | ENSG00000246404 | AC015871.3   | 2.20  | 2.17 |
| ENST00000394652 | IL16-002     | ENSG00000172349 | IL16         | -2.32 | 0.41 |
| ENST00000379224 | ISG20-201    | ENSG00000172183 | ISG20        | 10.41 | 1.17 |
| ENST00000464728 | CHTF18-003   | ENSG00000127586 | CHTF18       | -2.35 | 2.98 |
| ENST00000293981 | FLYWCH2-002  | ENSG00000162076 | FLYWCH2      | -2.69 | 3.95 |
| ENST00000008180 | IL32-201     | ENSG00000008517 | IL32         | 3.62  | 4.69 |
| ENST00000396870 | ZNF200-001   | ENSG00000010539 | ZNF200       | 2.78  | 3.78 |
| ENST00000219596 | MEFV-001     | ENSG00000103313 | MEFV         | 3.40  | 2.14 |
| ENST00000339854 | MEFV-201     | ENSG00000103313 | MEFV         | 2.83  | 3.52 |
| ENST00000268251 | ABAT-001     | ENSG00000183044 | ABAT         | -2.77 | 2.71 |
| ENST00000332029 | SOC51-001    | ENSG00000185338 | SOC51        | 5.94  | 0.68 |
| ENST00000499115 | AC009121-201 | ENSG00000245798 | AC009121.6   | 3.77  | 2.45 |
| ENST00000389126 | MKL2-204     | ENSG00000186260 | MKL2         | -2.54 | 2.67 |
| ENST00000468219 | CLEC19A-204  | ENSG00000188477 | CLEC19A      | 4.04  | 0.61 |
| ENST00000341901 | SBK1-201     | ENSG00000188322 | SBK1         | 3.01  | 1.86 |
| ENST00000356897 | IL27-001     | ENSG00000197272 | IL27         | 5.78  | 1.03 |

|                 |              |                 |            |       |      |
|-----------------|--------------|-----------------|------------|-------|------|
| ENST00000324873 | NUPR1-001    | ENSG00000176046 | NUPR1      | 4.21  | 0.93 |
| ENST00000416168 | AC009133-201 | ENSG00000238045 | AC009133.1 | 2.60  | 0.71 |
| ENST00000358758 | PRRT2-001    | ENSG00000167371 | PRRT2      | 3.63  | 3.78 |
| ENST00000500263 | AC009133-201 | ENSG00000246900 | AC009133.2 | 2.43  | 0.52 |
| ENST00000219150 | CORO1A-001   | ENSG00000102879 | CORO1A     | -2.73 | 0.59 |
| ENST00000254109 | C16orf67-001 | ENSG00000131797 | C16orf67   | 3.13  | 1.95 |
| ENST00000398685 | AC142381-201 | ENSG00000214627 | AC142381.3 | 3.00  | 1.01 |
| ENST00000498914 | AC007608-201 | ENSG00000245295 | AC007608.1 | 2.57  | 1.52 |
| ENST00000300589 | NOD2-001     | ENSG00000167207 | NOD2       | 3.05  | 0.95 |
| ENST00000431240 | NOD2-201     | ENSG00000167207 | NOD2       | 3.58  | 1.41 |
| ENST00000379780 | CETP-201     | ENSG00000087237 | CETP       | 2.76  | 1.88 |
| ENST00000327982 | NLRCS-202    | ENSG00000140853 | NLRCS      | 2.59  | 2.28 |
| ENST00000262510 | NLRCS-001    | ENSG00000140853 | NLRCS      | 2.47  | 0.69 |
| ENST00000322384 | DPEP2-202    | ENSG00000167261 | DPEP2      | -2.51 | 0.79 |
| ENST00000393350 | MAF-002      | ENSG00000178573 | MAF        | -2.68 | 0.80 |
| ENST00000393255 | AC025280-201 | ENSG00000213275 | AC025280.1 | 5.10  | 0.83 |
| ENST00000332281 | SNAI3-201    | ENSG00000185669 | SNAI3      | -2.67 | 0.76 |
| ENST00000499959 | AC092385-201 | ENSG00000246879 | AC092385.1 | -2.70 | 1.14 |
| ENST00000450523 | SERPINF2-202 | ENSG00000167711 | SERPINF2   | -2.89 | 2.54 |
| ENST00000225538 | P2RX1-201    | ENSG00000108405 | P2RX1      | -2.57 | 0.35 |
| ENST00000397041 | ATP2A3-206   | ENSG00000074370 | ATP2A3     | -2.59 | 4.43 |
| ENST00000315768 | C17orf87-201 | ENSG00000161929 | C17orf87   | 3.73  | 0.85 |
| ENST00000399600 | C17orf87-001 | ENSG00000161929 | C17orf87   | 3.86  | 0.66 |
| ENST00000307229 | NLRP1-001    | ENSG00000170233 | NLRP1      | -3.81 | 1.61 |
| ENST00000502200 | AC055839-201 | ENSG00000246184 | AC055839.2 | -3.32 | 1.45 |
| ENST00000431790 | XAF1-204     | ENSG00000132530 | XAF1       | 5.61  | 0.64 |
| ENST00000173229 | NTN1-001     | ENSG00000065320 | NTN1       | 2.50  | 1.15 |
| ENST00000360954 | HS3ST3B1-001 | ENSG00000125430 | HS3ST3B1   | 6.62  | 1.68 |
| ENST00000472570 | CENPV-004    | ENSG00000166582 | CENPV      | -3.13 | 1.76 |
| ENST00000440501 | SLC46A1-203  | ENSG00000076351 | SLC46A1    | -3.81 | 4.66 |
| ENST00000225831 | CCL2-001     | ENSG00000108691 | CCL2       | 6.22  | 0.90 |
| ENST00000225844 | CCL13-001    | ENSG00000181374 | CCL13      | 3.87  | 1.40 |
| ENST00000299977 | SLFN5-201    | ENSG00000166750 | SLFN5      | 2.49  | 1.10 |
| ENST00000452764 | SLFN12-201   | ENSG00000172123 | SLFN12     | 2.30  | 0.80 |
| ENST00000460530 | SLFN12-006   | ENSG00000172123 | SLFN12     | 2.12  | 2.41 |
| ENST00000361112 | SLFN12L-201  | ENSG00000205045 | SLFN12L    | 4.33  | 1.16 |
| ENST00000366113 | CCL5-002     | ENSG00000161570 | CCL5       | 9.87  | 1.71 |
| ENST00000225245 | CCL3-001     | ENSG00000006075 | CCL3       | 4.35  | 1.14 |
| ENST00000394495 | CCL4-202     | ENSG00000129277 | CCL4       | 7.35  | 2.42 |
| ENST00000425833 | CCL3L1-206   | ENSG00000205021 | CCL3L1     | 4.45  | 1.22 |
| ENST00000422211 | CCL3L1-001   | ENSG00000205021 | CCL3L1     | 5.13  | 1.27 |
| ENST00000431231 | ARHGAP23-201 | ENSG00000225485 | ARHGAP23   | 3.64  | 0.73 |
| ENST00000502030 | AC006449-201 | ENSG00000247905 | AC006449.1 | 3.28  | 0.73 |
| ENST00000301659 | GSDMA-201    | ENSG00000167914 | GSDMA      | -3.43 | 0.98 |
| ENST00000225474 | CSF3-001     | ENSG00000108342 | CSF3       | 3.68  | 2.99 |
| ENST00000269593 | IGFBP4-001   | ENSG00000141753 | IGFBP4     | 2.80  | 0.88 |
| ENST00000393931 | JUP-008      | ENSG00000173801 | JUP        | 4.22  | 1.14 |
| ENST00000310706 | JUP-001      | ENSG00000173801 | JUP        | 4.41  | 2.77 |
| ENST00000393888 | CNP-002      | ENSG00000173786 | CNP        | 2.52  | 0.47 |
| ENST00000251642 | DHX58-001    | ENSG00000108771 | DHX58      | 3.91  | 0.21 |
| ENST00000438323 | IFI35-203    | ENSG00000068079 | IFI35      | 3.94  | 3.57 |
| ENST00000415816 | IFI35-202    | ENSG00000068079 | IFI35      | 4.20  | 0.58 |
| ENST00000499030 | AC109326-201 | ENSG00000225584 | AC109326.1 | 2.46  | 1.06 |
| ENST00000393547 | DBF4B-202    | ENSG00000161692 | DBF4B      | 2.78  | 0.98 |
| ENST00000428638 | SH3D20-203   | ENSG00000159314 | SH3D20     | 2.29  | 4.19 |
| ENST00000389608 | UBE2Z-201    | ENSG00000159202 | UBE2Z      | 2.28  | 0.30 |
| ENST00000499842 | AC009720-201 | ENSG00000246640 | AC009720.1 | -2.78 | 1.56 |
| ENST00000397861 | C17orf67-001 | ENSG00000214226 | C17orf67   | 2.61  | 0.45 |
| ENST00000316881 | TRIM25-201   | ENSG00000121060 | TRIM25     | 2.35  | 0.68 |
| ENST00000500524 | AC004687-201 | ENSG00000245620 | AC004687.1 | 3.10  | 1.23 |
| ENST00000365207 | U1           | ENSG00000202077 | U1         | 2.61  | 1.97 |
| ENST00000259008 | BRIP1-201    | ENSG00000136492 | BRIP1      | 5.98  | 1.72 |
| ENST00000357585 | SSTR2-202    | ENSG00000180616 | SSTR2      | 5.11  | 1.21 |
| ENST00000328630 | CD300E-201   | ENSG00000186407 | CD300E     | 4.49  | 5.08 |
| ENST00000392619 | CD300E-001   | ENSG00000186407 | CD300E     | 6.88  | 1.40 |
| ENST00000499557 | AC087289-201 | ENSG00000245670 | AC087289.4 | 1.82  | 0.52 |
| ENST00000392496 | SPHK1-202    | ENSG00000176170 | SPHK1      | 2.24  | 0.88 |
| ENST00000318430 | TMC8-202     | ENSG00000167895 | TMC8       | -3.22 | 0.52 |
| ENST00000330871 | SOC3-201     | ENSG00000184557 | SOC3       | 3.57  | 0.84 |
| ENST00000501717 | AC061992-201 | ENSG00000245152 | AC061992.4 | 3.46  | 0.96 |
| ENST00000500207 | AC061992-201 | ENSG00000246030 | AC061992.1 | 2.50  | 3.09 |

|                  |              |                  |            |       |      |
|------------------|--------------|------------------|------------|-------|------|
| ENST00000262776  | LGALS3BP-201 | ENSG00000108679  | LGALS3BP   | 3.09  | 0.65 |
| ENST00000418895  | LGALS3BP-202 | ENSG00000108679  | LGALS3BP   | 3.40  | 0.89 |
| ENST00000319921  | AC124319-201 | ENSG00000180843  | AC124319.2 | 3.96  | 0.24 |
| ENST00000456466  | AC124319-203 | ENSG00000180843  | AC124319.2 | 3.82  | 0.87 |
| ENST00000411702  | AC124319-202 | ENSG00000180843  | AC124319.2 | 3.54  | 0.31 |
| ENST00000336301  | RNF213-201   | ENSG00000173821  | RNF213     | 4.11  | 1.13 |
| ENST00000437954  | AC124319-201 | ENSG00000237199  | AC124319.3 | 3.58  | 0.55 |
| ENST00000434136  | AC124319-201 | ENSG00000234591  | AC124319.1 | 3.18  | 0.50 |
| ENST00000326724  | AATK-001     | ENSG00000181409  | AATK       | -2.64 | 3.63 |
| ENST00000306897  | RAC3-201     | ENSG00000169750  | RAC3       | -2.49 | 0.97 |
| ENST00000312648  | CD7-201      | ENSG00000173762  | CD7        | 2.28  | 2.01 |
| ENST00000269389  | SECTM1-201   | ENSG00000141574  | SECTM1     | 3.71  | 0.53 |
| ENST00000300784  | FN3K-201     | ENSG00000167363  | FN3K       | -2.53 | 1.06 |
| ENST00000400256  | COLEC12-201  | ENSG00000158270  | COLEC12    | -3.39 | 1.52 |
| ENST00000261597  | NDC80-001    | ENSG00000080986  | NDC80      | 2.38  | 0.94 |
| ENST00000256925  | CABLES1-201  | ENSG00000134508  | CABLES1    | -3.08 | 2.54 |
| ENST00000400473  | CABLES1-202  | ENSG00000134508  | CABLES1    | -2.42 | 1.12 |
| ENST00000217740  | RNF125-001   | ENSG00000101695  | RNF125     | -3.56 | 0.75 |
| ENST00000257190  | RNF138-002   | ENSG00000134758  | RNF138     | 2.69  | 2.68 |
| ENST00000399218  | FAM59A-001   | ENSG00000141441  | FAM59A     | 3.07  | 0.97 |
| ENST00000409746  | PSTPIP2-002  | ENSG00000152229  | PSTPIP2    | 3.55  | 2.74 |
| ENST00000460200  | PSTPIP2-004  | ENSG00000152229  | PSTPIP2    | 3.41  | 1.17 |
| ENST00000502112  | AC090355-201 | ENSG00000245457  | AC090355.2 | 2.69  | 1.50 |
| ENST00000332053  | ZBTB7C-201   | ENSG00000184828  | ZBTB7C     | -2.54 | 1.09 |
| ENST00000316660  | PMAIP1-001   | ENSG00000141682  | PMAIP1     | 4.67  | 1.02 |
| ENST00000269518  | PMAIP1-002   | ENSG00000141682  | PMAIP1     | 5.22  | 1.79 |
| ENST00000398175  | AC090377-201 | ENSG00000214349  | AC090377.5 | 2.84  | 0.78 |
| ENST00000252288  | GAMT-201     | ENSG00000130005  | GAMT       | -3.83 | 2.71 |
| ENST00000404279  | LINGO3-201   | ENSG00000220008  | LINGO3     | -2.63 | 2.02 |
| ENST00000417546  | AC104530-201 | ENSG00000235353  | AC104530.1 | -3.21 | 1.85 |
| ENST00000382159  | GNF7-201     | ENSG00000176533  | GNF7       | -3.16 | 1.65 |
| ENST00000499973  | AC011522-201 | ENSG00000244897  | AC011522.1 | -3.98 | 2.30 |
| ENST00000394321  | MCOLN1-202   | ENSG00000090674  | MCOLN1     | -2.43 | 2.59 |
| ENST00000221515  | RETN-201     | ENSG00000104918  | RETN       | -2.76 | 2.34 |
| ENST00000423345  | PRAM1-202    | ENSG00000133246  | PRAM1      | -3.60 | 2.74 |
| ENST00000253110  | C19orf66-201 | ENSG00000130813  | C19orf66   | 3.22  | 0.29 |
| ENST00000264832  | ICAM1-201    | ENSG00000090339  | ICAM1      | 3.15  | 0.55 |
| ENST00000393423  | RGL3-203     | ENSG00000205517  | RGL3       | -2.93 | 2.54 |
| ENST00000360105  | NFIX-203     | ENSG00000008441  | NFIX       | 2.87  | 2.77 |
| ENST00000357018  | CACNA1A-202  | ENSG00000141837  | CACNA1A    | 4.74  | 1.94 |
| ENST00000269720  | AC022098-201 | ENSG00000141854  | AC022098.1 | -2.59 | 1.17 |
| ENST00000397372  | HSN2D-202    | ENSG00000196684  | HSN2D      | 8.45  | 1.96 |
| ENST00000252590  | PLVAP-201    | ENSG00000130300  | PLVAP      | 2.83  | 1.46 |
| ENST00000252593  | BST2-201     | ENSG00000130303  | BST2       | 2.24  | 0.61 |
| ENST00000500836  | AC010319-201 | ENSG00000244887  | AC010319.2 | 2.57  | 0.35 |
| ENST00000458235  | JAK3-204     | ENSG00000105639  | JAK3       | 5.53  | 0.65 |
| ENST00000222249  | KCNN1-201    | ENSG00000105642  | KCNN1      | 5.45  | 1.69 |
| ENST00000392406  | LRRC25-202   | ENSG00000175489  | LRRC25     | -2.76 | 2.67 |
| ENST00000317991  | GRAMD1A-201  | ENSG00000089351  | GRAMD1A    | 3.86  | 3.92 |
| ENST00000270310  | FXRD7-201    | ENSG00000221946  | FXRD7      | -2.49 | 1.20 |
| ENST00000246549  | FFAR2-201    | ENSG00000126262  | FFAR2      | 4.30  | 1.02 |
| ENST000000007510 | SNX26-201    | ENSG000000004777 | SNX26      | -2.56 | 3.06 |
| ENST00000454404  | RASGRP4-204  | ENSG00000171777  | RASGRP4    | -3.34 | 5.61 |
| ENST00000221347  | FCGBP-201    | ENSG00000090920  | FCGBP      | -4.09 | 0.73 |
| ENST00000428281  | FCGBP-202    | ENSG00000090920  | FCGBP      | -4.63 | 1.54 |
| ENST00000434370  | FCGBP-203    | ENSG00000090920  | FCGBP      | -4.73 | 2.32 |
| ENST00000352632  | SPTBN4-203   | ENSG00000160460  | SPTBN4     | -2.74 | 3.00 |
| ENST00000359092  | AXL-202      | ENSG00000167601  | AXL        | 4.71  | 1.27 |
| ENST00000415495  | CEACAM3-003  | ENSG00000170956  | CEACAM3    | -2.52 | 2.09 |
| ENST00000403534  | BCL3-201     | ENSG00000069399  | BCL3       | 2.16  | 0.36 |
| ENST00000473468  | BCL3-004     | ENSG00000069399  | BCL3       | 2.11  | 4.26 |
| ENST00000270233  | BCAM-201     | ENSG00000187244  | BCAM       | -2.71 | 1.46 |
| ENST00000252483  | PVRL2-201    | ENSG00000130202  | PVRL2      | 2.15  | 0.29 |
| ENST00000252485  | PVRL2-202    | ENSG00000130202  | PVRL2      | 2.09  | 0.67 |
| ENST00000221452  | RELB-201     | ENSG00000104856  | RELB       | 2.43  | 0.60 |
| ENST00000291294  | PTGIR-201    | ENSG00000160013  | PTGIR      | 2.20  | 0.98 |
| ENST00000300880  | BBC3-201     | ENSG00000105327  | BBC3       | 2.50  | 2.33 |
| ENST00000354276  | PLA2G4C-201  | ENSG00000105499  | PLA2G4C    | 2.75  | 0.48 |
| ENST00000200453  | PPP1R15A-201 | ENSG00000087074  | PPP1R15A   | 2.86  | 0.67 |
| ENST00000501000  | AC026803-201 | ENSG00000247915  | AC026803.1 | 3.25  | 1.77 |
| ENST00000270645  | RCN3-201     | ENSG00000142552  | RCN3       | -3.16 | 0.79 |



|                 |              |                 |             |       |      |
|-----------------|--------------|-----------------|-------------|-------|------|
| ENST00000246801 | TSKS-201     | ENSG00000126467 | TSKS        | -2.71 | 2.03 |
| ENST00000391833 | AKT1S1-005   | ENSG00000204673 | AKT1S1      | 2.94  | 0.68 |
| ENST00000391832 | AKT1S1-003   | ENSG00000204673 | AKT1S1      | 2.98  | 3.70 |
| ENST00000391835 | AKT1S1-002   | ENSG00000204673 | AKT1S1      | 4.63  | 0.73 |
| ENST00000391831 | AKT1S1-004   | ENSG00000204673 | AKT1S1      | 3.04  | 0.99 |
| ENST00000221543 | TBC1D17-201  | ENSG00000104946 | TBC1D17     | 2.11  | 0.86 |
| ENST00000391826 | IL4I1-203    | ENSG00000104951 | IL4I1       | 4.80  | 0.43 |
| ENST00000423777 | ATF5-202     | ENSG00000169136 | ATF5        | 3.59  | 0.85 |
| ENST00000306139 | ATF5-201     | ENSG00000169136 | ATF5        | 3.80  | 0.81 |
| ENST00000253720 | NAPSB-201    | ENSG00000131401 | NAPSB       | 3.11  | 1.10 |
| ENST00000391813 | SHANK1-003   | ENSG00000161681 | SHANK1      | -3.26 | 2.63 |
| ENST00000500289 | AC011473-201 | ENSG00000245686 | AC011473.1  | -3.14 | 1.73 |
| ENST00000340023 | FPR2-201     | ENSG00000171049 | FPR2        | 3.41  | 1.08 |
| ENST00000339223 | FPR3-201     | ENSG00000187474 | FPR3        | 2.28  | 0.75 |
| ENST00000396331 | LILRB1-002   | ENSG00000104972 | LILRB1      | 4.65  | 0.65 |
| ENST00000430952 | LILRB4-002   | ENSG00000186818 | LILRB4      | 1.60  | 0.44 |
| ENST00000434286 | LILRB4-006   | ENSG00000186818 | LILRB4      | 2.43  | 0.45 |
| ENST00000502093 | AC017076-201 | ENSG00000247107 | AC017076.1  | 7.85  | 1.01 |
| ENST00000382040 | RSAD2-001    | ENSG00000134321 | RSAD2       | 10.13 | 1.93 |
| ENST00000304567 | RRM2-201     | ENSG00000171848 | RRM2        | -2.56 | 1.18 |
| ENST00000295082 | KCNF1-001    | ENSG00000162975 | KCNF1       | -3.69 | 1.52 |
| ENST00000396123 | GREB1-209    | ENSG00000196208 | GREB1       | -2.82 | 0.45 |
| ENST00000405331 | TRIB2-004    | ENSG00000071575 | TRIB2       | 3.55  | 2.05 |
| ENST00000448919 | C2orf84-009  | ENSG00000219626 | C2orf84     | -2.55 | 2.14 |
| ENST00000490823 | KHK-003      | ENSG00000138030 | KHK         | -2.93 | 1.56 |
| ENST00000429697 | KHK-006      | ENSG00000138030 | KHK         | -2.35 | 1.80 |
| ENST00000444257 | PLB1-005     | ENSG00000163803 | PLB1        | -3.01 | 1.98 |
| ENST00000465300 | FAM179A-001  | ENSG00000189350 | FAM179A     | -3.66 | 1.09 |
| ENST00000331664 | C2orf71-001  | ENSG00000179270 | C2orf71     | -3.50 | 1.13 |
| ENST00000233057 | EIF2AK2-001  | ENSG00000055332 | EIF2AK2     | 3.32  | 0.41 |
| ENST00000395127 | EIF2AK2-203  | ENSG00000055332 | EIF2AK2     | 3.63  | 4.41 |
| ENST00000272249 | HNRPLL-005   | ENSG00000143889 | HNRPLL      | 2.25  | 2.71 |
| ENST00000410063 | GALM-003     | ENSG00000143891 | GALM        | 2.55  | 4.74 |
| ENST00000467135 | PRKCE-002    | ENSG00000171132 | PRKCE       | 2.04  | 2.80 |
| ENST00000450096 | PNPT1-201    | ENSG00000138035 | PNPT1       | 2.86  | 2.34 |
| ENST00000481066 | PNPT1-005    | ENSG00000138035 | PNPT1       | 4.17  | 0.87 |
| ENST00000496857 | EHBP1-009    | ENSG00000115504 | EHBP1       | 2.21  | 2.17 |
| ENST00000358912 | PELI1-001    | ENSG00000197329 | PELI1       | 2.95  | 1.06 |
| ENST00000481714 | CNRIP1-003   | ENSG00000119865 | CNRIP1      | -2.25 | 1.06 |
| ENST00000409202 | ARHGAP25-001 | ENSG00000163219 | ARHGAP25    | 2.06  | 5.76 |
| ENST00000264444 | MXD1-001     | ENSG00000059728 | MXD1        | 2.56  | 0.60 |
| ENST00000454815 | TIA1-013     | ENSG00000116001 | TIA1        | 2.71  | 3.42 |
| ENST00000258083 | C2orf7-001   | ENSG00000135617 | C2orf7      | -2.36 | 0.54 |
| ENST00000428767 | ALMS1P-001   | ENSG00000163016 | ALMS1P      | 2.75  | 1.64 |
| ENST00000470592 | MTHFD2-007   | ENSG00000065911 | MTHFD2      | 2.50  | 4.57 |
| ENST00000306384 | VAMP5-001    | ENSG00000168899 | VAMP5       | 4.60  | 1.20 |
| ENST00000455121 | AC105053-002 | ENSG00000232504 | AC105053.3  | 2.51  | 2.32 |
| ENST00000458519 | AC008268-005 | ENSG00000237510 | AC008268.4  | -2.70 | 2.29 |
| ENST00000482704 | GPAT2-210    | ENSG00000186281 | GPAT2       | -2.66 | 1.35 |
| ENST00000409345 | ADRA2B-001   | ENSG00000222040 | ADRA2B      | -3.56 | 0.69 |
| ENST00000240423 | NCAPH-001    | ENSG00000121152 | NCAPH       | -2.82 | 2.95 |
| ENST00000427946 | NCAPH-002    | ENSG00000121152 | NCAPH       | -2.49 | 3.15 |
| ENST00000435349 | NCAPH-006    | ENSG00000121152 | NCAPH       | -2.66 | 0.50 |
| ENST00000454558 | ARID5A-004   | ENSG00000196843 | ARID5A      | 2.44  | 0.64 |
| ENST00000357682 | BCL2L11-202  | ENSG00000153094 | BCL2L11     | 2.29  | 0.93 |
| ENST00000354115 | IL1RN-002    | ENSG00000136689 | IL1RN       | 3.17  | 0.72 |
| ENST00000409930 | IL1RN-005    | ENSG00000136689 | IL1RN       | 4.18  | 4.31 |
| ENST00000376448 | CBWD2-201    | ENSG00000136682 | CBWD2       | 2.30  | 1.58 |
| ENST00000306406 | TMEM37-001   | ENSG00000171227 | TMEM37      | -2.89 | 0.67 |
| ENST00000452780 | EPB41L5-007  | ENSG00000115109 | EPB41L5     | 2.16  | 2.99 |
| ENST00000438005 | AC012363-001 | ENSG00000223549 | AC012363.5  | 2.47  | 1.30 |
| ENST00000445926 | AC012363-001 | ENSG00000236878 | AC012363.11 | 2.25  | 0.99 |
| ENST00000415971 | AC012363-001 | ENSG00000234065 | AC012363.6  | 2.49  | 1.27 |
| ENST00000428909 | AC013444-001 | ENSG00000229781 | AC013444.2  | 2.41  | 1.30 |
| ENST00000331426 | RBM43-001    | ENSG00000184898 | RBM43       | 2.56  | 0.58 |
| ENST00000243346 | NMI-001      | ENSG00000123609 | NMI         | 3.15  | 0.37 |
| ENST00000421360 | AC092584-001 | ENSG00000236917 | AC092584.1  | 2.33  | 1.19 |
| ENST00000339562 | NR4A2-001    | ENSG00000153234 | NR4A2       | 3.28  | 1.79 |
| ENST00000259075 | TANK-001     | ENSG00000136560 | TANK        | 2.47  | 3.51 |
| ENST00000360534 | DPP4-001     | ENSG00000197635 | DPP4        | 5.54  | 2.51 |
| ENST00000491591 | DPP4-010     | ENSG00000197635 | DPP4        | 4.52  | 1.77 |

|                 |                |                 |              |       |      |
|-----------------|----------------|-----------------|--------------|-------|------|
| ENST00000502006 | AC008063-201   | ENSG00000246092 | AC008063.2   | 3.60  | 0.66 |
| ENST00000432251 | AC008063-001   | ENSG00000233397 | AC008063.3   | 2.80  | 1.58 |
| ENST00000263642 | IFIH1-001      | ENSG00000115267 | IFIH1        | 6.21  | 0.57 |
| ENST00000473240 | GCA-013        | ENSG00000115271 | GCA          | 4.34  | 2.36 |
| ENST00000409882 | GALNT3-010     | ENSG00000115339 | GALNT3       | 3.13  | 0.97 |
| ENST00000190611 | OSBPL6-001     | ENSG00000079156 | OSBPL6       | 2.32  | 2.00 |
| ENST00000361099 | STAT1-001      | ENSG00000115415 | STAT1        | 4.76  | 0.85 |
| ENST00000392322 | STAT1-003      | ENSG00000115415 | STAT1        | 3.68  | 6.94 |
| ENST00000320717 | GLS-001        | ENSG00000115419 | GLS          | 2.31  | 0.57 |
| ENST00000447143 | STAT4-201      | ENSG00000138378 | STAT4        | 4.20  | 3.21 |
| ENST00000409140 | SPATS2L-005    | ENSG00000196141 | SPATS2L      | 2.33  | 2.43 |
| ENST00000341582 | CFLAR-006      | ENSG00000003402 | CFLAR        | 2.07  | 0.35 |
| ENST00000395148 | CFLAR-005      | ENSG00000003402 | CFLAR        | 2.94  | 0.31 |
| ENST00000423241 | CFLAR-008      | ENSG00000003402 | CFLAR        | 2.41  | 3.95 |
| ENST00000440180 | CFLAR-010      | ENSG00000003402 | CFLAR        | 2.70  | 1.96 |
| ENST00000457277 | CFLAR-011      | ENSG00000003402 | CFLAR        | 2.50  | 2.88 |
| ENST00000462763 | CFLAR-023      | ENSG00000003402 | CFLAR        | 2.90  | 3.39 |
| ENST00000460961 | CFLAR-024      | ENSG00000003402 | CFLAR        | 2.60  | 0.41 |
| ENST00000415011 | ALS2CR10-001   | ENSG00000226312 | ALS2CR10     | 2.47  | 0.68 |
| ENST00000286186 | CASP10-001     | ENSG00000003400 | CASP10       | 2.76  | 3.83 |
| ENST00000432109 | CASP8-014      | ENSG00000064012 | CASP8        | 2.91  | 3.22 |
| ENST00000490682 | CASP8-008      | ENSG00000064012 | CASP8        | 3.11  | 0.52 |
| ENST00000445231 | BMPR2-201      | ENSG00000204217 | BMPR2        | 2.26  | 0.56 |
| ENST00000408943 | PLEKHM3-203    | ENSG00000178385 | PLEKHM3      | 2.34  | 3.75 |
| ENST00000392194 | MAP2-002       | ENSG00000078018 | MAP2         | 4.95  | 2.15 |
| ENST00000260947 | BARD1-001      | ENSG00000138376 | BARD1        | 2.12  | 0.73 |
| ENST00000441828 | RUFY4-202      | ENSG00000188282 | RUFY4        | 5.29  | 1.69 |
| ENST00000439871 | IL8RBP-002     | ENSG00000229754 | IL8RBP       | 2.89  | 0.73 |
| ENST00000490275 | GPBAR1-002     | ENSG00000179921 | GPBAR1       | 3.26  | 5.04 |
| ENST00000354867 | GPBAR1-201     | ENSG00000179921 | GPBAR1       | 4.22  | 2.45 |
| ENST00000441749 | AC021016-001   | ENSG00000225062 | AC021016.3   | -2.79 | 1.13 |
| ENST00000233202 | SLC11A1-001    | ENSG00000018280 | SLC11A1      | -2.52 | 0.96 |
| ENST00000494322 | SLC11A1-010    | ENSG00000018280 | SLC11A1      | -3.58 | 3.43 |
| ENST00000490872 | SLC11A1-019    | ENSG00000018280 | SLC11A1      | -2.69 | 3.30 |
| ENST00000490536 | SLC11A1-012    | ENSG00000018280 | SLC11A1      | -2.64 | 2.44 |
| ENST00000392068 | SGPP2-001      | ENSG00000163082 | SGPP2        | 4.18  | 1.77 |
| ENST00000343805 | SP140-009      | ENSG00000079263 | SP140        | 4.52  | 4.76 |
| ENST00000373645 | SP140-003      | ENSG00000079263 | SP140        | 3.78  | 0.88 |
| ENST00000483728 | SP140L-002     | ENSG00000185404 | SP140L       | 2.68  | 2.93 |
| ENST00000483776 | SP140L-008     | ENSG00000185404 | SP140L       | 2.92  | 2.85 |
| ENST00000477068 | SP110-005      | ENSG00000135899 | SP110        | 3.79  | 0.32 |
| ENST00000392048 | SP110-004      | ENSG00000135899 | SP110        | 3.86  | 0.24 |
| ENST00000489597 | SP110-012      | ENSG00000135899 | SP110        | 3.84  | 2.77 |
| ENST00000409341 | SP100-006      | ENSG00000067066 | SP100        | 2.86  | 4.05 |
| ENST00000494901 | SP100-007      | ENSG00000067066 | SP100        | 2.52  | 2.76 |
| ENST00000410320 | SRP_euk_arch   | ENSG00000222252 | SRP_euk_arch | 2.48  | 1.78 |
| ENST00000305141 | NMUR1-001      | ENSG00000171596 | NMUR1        | -3.64 | 1.45 |
| ENST00000442811 | AC104809-002   | ENSG00000226321 | AC104809.2   | -4.93 | 1.25 |
| ENST00000418218 | AC104809-002   | ENSG00000233392 | AC104809.3   | -5.89 | 1.32 |
| ENST00000438506 | AC104809-003   | ENSG00000233392 | AC104809.3   | -4.74 | 0.85 |
| ENST00000334409 | PDCD1-001      | ENSG00000188389 | PDCD1        | 3.47  | 1.88 |
| ENST00000380605 | CPXM1-001      | ENSG00000088882 | CPXM1        | 2.76  | 2.19 |
| ENST00000419548 | SIGLEC1-002    | ENSG00000088827 | SIGLEC1      | 3.07  | 0.93 |
| ENST00000344754 | SIGLEC1-001    | ENSG00000088827 | SIGLEC1      | 2.76  | 0.76 |
| ENST00000378827 | BMP2-001       | ENSG00000125845 | BMP2         | 2.81  | 1.76 |
| ENST00000484638 | RIN2-001       | ENSG00000132669 | RIN2         | 3.01  | 1.25 |
| ENST00000377103 | THBD-001       | ENSG00000178726 | THBD         | -4.69 | 1.03 |
| ENST00000375862 | HCK-002        | ENSG00000101336 | HCK          | 2.36  | 4.84 |
| ENST00000501883 | AL121906-201   | ENSG00000246833 | AL121906.1   | -3.29 | 1.59 |
| ENST00000397711 | MAP1LC3A-201   | ENSG00000101460 | MAP1LC3A     | 5.03  | 3.16 |
| ENST00000216968 | PROCR-201      | ENSG00000101000 | PROCR        | 3.34  | 2.96 |
| ENST00000438192 | PPP1R16B-004   | ENSG00000101445 | PPP1R16B     | 2.12  | 2.33 |
| ENST00000372285 | CD40-001       | ENSG00000101017 | CD40         | 3.10  | 0.69 |
| ENST00000372278 | CD40-201       | ENSG00000101017 | CD40         | 3.41  | 0.35 |
| ENST00000466205 | CD40-006       | ENSG00000101017 | CD40         | 4.48  | 3.04 |
| ENST00000371752 | ZNFX1-001      | ENSG00000124201 | ZNFX1        | 2.96  | 0.40 |
| ENST00000498985 | AL035683-201   | ENSG00000247323 | AL035683.1   | 3.00  | 2.24 |
| ENST00000449816 | RNF114-202     | ENSG00000124226 | RNF114       | 2.98  | 3.00 |
| ENST00000244050 | SNAI1-001      | ENSG00000124216 | SNAI1        | 4.01  | 1.32 |
| ENST00000252889 | RP4-697K14-201 | ENSG00000130589 | RP4-697K14.2 | 5.90  | 2.36 |
| ENST00000467148 | RP4-697K14-003 | ENSG00000130589 | RP4-697K14.2 | 5.48  | 6.27 |

|                 |                |                 |              |       |      |
|-----------------|----------------|-----------------|--------------|-------|------|
| ENST00000479540 | RP4-697K14-005 | ENSG00000130589 | RP4-697K14.2 | 5.87  | 0.62 |
| ENST00000389440 | SAMSN1-201     | ENSG00000155307 | SAMSN1       | 2.63  | 3.04 |
| ENST00000435315 | AF127936-001   | ENSG00000226751 | AF127936.4   | 3.22  | 1.86 |
| ENST00000284881 | C21orf91-003   | ENSG00000154642 | C21orf91     | 2.95  | 1.83 |
| ENST00000501838 | AL109616-201   | ENSG00000246147 | AL109616.1   | 3.82  | 0.94 |
| ENST00000456917 | MIRHG2-001     | ENSG00000234883 | MIRHG2       | 4.03  | 0.80 |
| ENST00000502007 | C21orf71-201   | ENSG00000247211 | C21orf71     | 4.32  | 1.88 |
| ENST00000333063 | OLIG1-201      | ENSG00000184221 | OLIG1        | 2.41  | 2.72 |
| ENST00000290349 | CBR1-001       | ENSG00000159228 | CBR1         | 2.44  | 0.19 |
| ENST00000472398 | TTC3-006       | ENSG00000182670 | TTC3         | -3.10 | 3.12 |
| ENST00000330714 | MX2-001        | ENSG00000183486 | MX2          | 6.42  | 0.66 |
| ENST00000482953 | MX2-002        | ENSG00000183486 | MX2          | 5.84  | 0.53 |
| ENST00000474368 | MX2-004        | ENSG00000183486 | MX2          | 5.46  | 0.74 |
| ENST00000398598 | MX1-002        | ENSG00000157601 | MX1          | 9.36  | 3.10 |
| ENST00000455164 | MX1-201        | ENSG00000157601 | MX1          | 7.47  | 3.89 |
| ENST00000400377 | ICOSLG-002     | ENSG00000160223 | ICOSLG       | 2.49  | 3.92 |
| ENST00000473212 | COL18A1-004    | ENSG00000182871 | COL18A1      | -2.77 | 1.20 |
| ENST00000468508 | SLC19A1-011    | ENSG00000173638 | SLC19A1      | -3.63 | 1.66 |
| ENST00000311124 | SLC19A1-001    | ENSG00000173638 | SLC19A1      | -3.31 | 0.86 |
| ENST00000474319 | LSS-003        | ENSG00000160285 | LSS          | 2.54  | 0.76 |
| ENST00000397728 | LSS-002        | ENSG00000160285 | LSS          | 2.27  | 0.56 |
| ENST00000397679 | C21orf58-004   | ENSG00000160298 | C21orf58     | -2.83 | 1.81 |
| ENST00000291700 | S100B-001      | ENSG00000160307 | S100B        | -2.40 | 1.65 |
| ENST00000399777 | BCL2L13-006    | ENSG00000099968 | BCL2L13      | 2.27  | 0.38 |
| ENST00000215794 | USP18-001      | ENSG00000184979 | USP18        | 6.39  | 0.78 |
| ENST00000263208 | HIRA-001       | ENSG00000100084 | HIRA         | 1.67  | 0.49 |
| ENST00000292729 | USP41-001      | ENSG00000161133 | USP41        | 7.28  | 0.95 |
| ENST00000470202 | USP41-002      | ENSG00000161133 | USP41        | 6.83  | 1.27 |
| ENST00000382701 | ASPHD2-201     | ENSG00000128203 | ASPHD2       | 3.17  | 0.75 |
| ENST00000215939 | CRYBB1-001     | ENSG00000100122 | CRYBB1       | -2.97 | 2.86 |
| ENST00000302326 | MN1-001        | ENSG00000169184 | MN1          | 4.07  | 0.96 |
| ENST00000344347 | XBP1-201       | ENSG00000100219 | XBP1         | 2.15  | 3.64 |
| ENST00000215781 | OSM-001        | ENSG00000099985 | OSM          | 3.11  | 1.48 |
| ENST00000400289 | SFI1-014       | ENSG00000198089 | SFI1         | 2.31  | 3.22 |
| ENST00000442204 | C22orf28-203   | ENSG00000100220 | C22orf28     | 2.86  | 3.01 |
| ENST00000426906 | C22orf28-201   | ENSG00000100220 | C22orf28     | 2.58  | 0.31 |
| ENST00000409652 | APOL6-001      | ENSG00000221963 | APOL6        | 3.28  | 0.45 |
| ENST00000479929 | APOL4-003      | ENSG00000100336 | APOL4        | 2.58  | 0.85 |
| ENST00000426053 | APOL1-203      | ENSG00000100342 | APOL1        | 4.45  | 6.85 |
| ENST00000416338 | APOL1-007      | ENSG00000100342 | APOL1        | 3.30  | 6.00 |
| ENST00000397279 | APOL1-201      | ENSG00000100342 | APOL1        | 2.89  | 1.08 |
| ENST00000262825 | CSF2RB-201     | ENSG00000100368 | CSF2RB       | 2.49  | 3.95 |
| ENST00000215886 | LGALS2-001     | ENSG00000100079 | LGALS2       | 4.01  | 1.55 |
| ENST00000216044 | GTPBP1-001     | ENSG00000100226 | GTPBP1       | 2.64  | 0.32 |
| ENST00000458073 | GTPBP1-010     | ENSG00000100226 | GTPBP1       | 3.47  | 5.41 |
| ENST00000469086 | UNC84B-013     | ENSG00000100242 | UNC84B       | 2.62  | 3.95 |
| ENST00000499426 | AL008583-201   | ENSG00000244850 | AL008583.1   | 3.09  | 2.21 |
| ENST00000396770 | APOBEC3A-202   | ENSG00000128383 | APOBEC3A     | 8.44  | 6.52 |
| ENST00000249116 | APOBEC3A-201   | ENSG00000128383 | APOBEC3A     | 9.87  | 1.02 |
| ENST00000308521 | APOBEC3F-001   | ENSG00000128394 | APOBEC3F     | 4.21  | 0.40 |
| ENST00000381565 | APOBEC3F-002   | ENSG00000128394 | APOBEC3F     | 2.54  | 0.54 |
| ENST00000476513 | APOBEC3F-004   | ENSG00000128394 | APOBEC3F     | 3.10  | 0.84 |
| ENST00000263247 | APOBEC3G-201   | ENSG00000239713 | APOBEC3G     | 4.55  | 0.39 |
| ENST00000407997 | APOBEC3G-001   | ENSG00000239713 | APOBEC3G     | 4.90  | 2.82 |
| ENST00000494150 | APOBEC3G-007   | ENSG00000239713 | APOBEC3G     | 3.86  | 0.35 |
| ENST00000481958 | APOBEC3G-003   | ENSG00000239713 | APOBEC3G     | 3.55  | 0.52 |
| ENST00000216133 | CBX7-001       | ENSG00000100307 | CBX7         | -2.43 | 0.83 |
| ENST00000441207 | RP4-742C19-001 | ENSG00000227009 | RP4-742C19.2 | 2.78  | 0.61 |
| ENST00000441316 | RP4-756G23-001 | ENSG00000235513 | RP4-756G23.1 | 2.17  | 0.73 |
| ENST00000463886 | PPPDE2-002     | ENSG00000100418 | PPPDE2       | 2.24  | 4.69 |
| ENST00000216180 | PNPLA3-001     | ENSG00000100344 | PNPLA3       | -4.58 | 2.12 |
| ENST00000453888 | PARVG-204      | ENSG00000138964 | PARVG        | -3.03 | 0.48 |
| ENST00000417767 | PARVG-010      | ENSG00000138964 | PARVG        | -2.60 | 3.39 |
| ENST00000501307 | AL096766-201   | ENSG00000246911 | AL096766.1   | -2.40 | 2.24 |
| ENST00000497738 | MAPK12-008     | ENSG00000188130 | MAPK12       | -2.53 | 3.78 |
| ENST00000496227 | NCAPH2-010     | ENSG00000025770 | NCAPH2       | 2.91  | 0.79 |
| ENST00000252785 | SCO2-002       | ENSG00000130489 | SCO2         | 4.02  | 4.24 |
| ENST00000449555 | TYMP-203       | ENSG00000025708 | TYMP         | 2.48  | 0.64 |
| ENST00000487577 | TYMP-007       | ENSG00000025708 | TYMP         | 2.20  | 0.70 |
| ENST00000476284 | TYMP-002       | ENSG00000025708 | TYMP         | 2.54  | 5.18 |
| ENST00000425169 | TYMP-008       | ENSG00000025708 | TYMP         | 2.29  | 3.89 |

|                 |                |                  |              |       |      |
|-----------------|----------------|------------------|--------------|-------|------|
| ENST00000419305 | TYMP-201       | ENSG00000025708  | TYMP         | 2.18  | 7.01 |
| ENST00000487162 | TYMP-004       | ENSG000000025708 | TYMP         | 2.60  | 0.59 |
| ENST00000395676 | KLHDC7B-001    | ENSG00000130487  | KLHDC7B      | 3.49  | 2.35 |
| ENST00000423069 | CPT1B-012      | ENSG00000205560  | CPT1B        | 2.33  | 3.24 |
| ENST00000476790 | CPT1B-010      | ENSG00000205560  | CPT1B        | 2.31  | 3.06 |
| ENST00000450418 | AC023480-001   | ENSG00000229241  | AC023480.1   | 4.20  | 1.19 |
| ENST00000500408 | AC008151-201   | ENSG00000246544  | AC008151.1   | 4.13  | 2.98 |
| ENST00000482803 | CAMK1-004      | ENSG00000134072  | CAMK1        | -2.71 | 3.52 |
| ENST00000256458 | IRAK2-001      | ENSG00000134070  | IRAK2        | 3.56  | 0.91 |
| ENST00000454374 | AC090947-203   | ENSG00000224182  | AC090947.1   | -2.87 | 1.63 |
| ENST00000396999 | PPARG-014      | ENSG00000132170  | PPARG        | -3.13 | 2.35 |
| ENST00000429166 | PPARG-016      | ENSG00000132170  | PPARG        | -3.02 | 2.58 |
| ENST00000285046 | FGD5-001       | ENSG00000154783  | FGD5         | -2.58 | 2.98 |
| ENST00000393779 | AC104297-001   | ENSG00000213383  | AC104297.1   | 2.32  | 0.50 |
| ENST00000263754 | KAT2B-001      | ENSG00000114166  | KAT2B        | 2.35  | 1.05 |
| ENST00000301807 | LBA1-201       | ENSG00000168016  | LBA1         | 4.26  | 0.74 |
| ENST00000429976 | LBA1-202       | ENSG00000168016  | LBA1         | 3.77  | 4.03 |
| ENST00000396428 | LRRFIP2-006    | ENSG00000093167  | LRRFIP2      | 2.25  | 3.51 |
| ENST00000417037 | MYD88-202      | ENSG00000172936  | MYD88        | 2.48  | 1.33 |
| ENST00000484513 | MYD88-007      | ENSG00000172936  | MYD88        | 2.36  | 3.29 |
| ENST00000273153 | CSRNP1-001     | ENSG00000144655  | CSRNP1       | 4.13  | 0.72 |
| ENST00000499886 | AC092053-201   | ENSG00000246007  | AC092053.1   | 3.84  | 0.50 |
| ENST00000354698 | ZNF589-001     | ENSG00000164048  | ZNF589       | -2.99 | 2.21 |
| ENST00000333486 | UBA7-001       | ENSG00000182179  | UBA7         | 2.15  | 0.30 |
| ENST00000488536 | UBA7-004       | ENSG00000182179  | UBA7         | 2.37  | 0.32 |
| ENST00000460703 | UBA7-009       | ENSG00000182179  | UBA7         | 1.96  | 0.45 |
| ENST00000475688 | ZMYND10-005    | ENSG00000004838  | ZMYND10      | -2.51 | 1.64 |
| ENST00000495880 | DUSP7-001      | ENSG00000164086  | DUSP7        | -2.35 | 2.57 |
| ENST00000469623 | DUSP7-002      | ENSG00000164086  | DUSP7        | -2.44 | 1.78 |
| ENST00000441742 | AC115284-201   | ENSG00000233341  | AC115284.1   | -2.52 | 0.46 |
| ENST00000231721 | SEMA3G-001     | ENSG00000010319  | SEMA3G       | -3.29 | 0.86 |
| ENST00000321725 | STAB1-001      | ENSG00000010327  | STAB1        | -2.87 | 0.72 |
| ENST00000468472 | MUSTN1-004     | ENSG00000243696  | MUSTN1       | 3.28  | 0.37 |
| ENST00000495552 | MUSTN1-003     | ENSG00000243696  | MUSTN1       | 3.06  | 0.50 |
| ENST00000355083 | TMEM110-004    | ENSG00000213533  | TMEM110      | 3.29  | 0.34 |
| ENST00000464769 | TMEM110-005    | ENSG00000213533  | TMEM110      | 3.06  | 0.67 |
| ENST00000478366 | RP5-966M1-001  | ENSG00000239799  | RP5-966M1.1  | 3.00  | 1.43 |
| ENST00000500808 | AC097015-201   | ENSG00000247777  | AC097015.3   | 2.07  | 1.03 |
| ENST00000473921 | HESX1-002      | ENSG00000163666  | HESX1        | 5.90  | 1.11 |
| ENST00000481527 | ACOX2-013      | ENSG00000168306  | ACOX2        | -2.75 | 2.55 |
| ENST00000431462 | AC108724-201   | ENSG00000234317  | AC108724.2   | 3.17  | 0.72 |
| ENST00000463183 | RP11-413E6-001 | ENSG00000242516  | RP11-413E6.5 | 2.28  | 1.84 |
| ENST00000486971 | C3orf38-003    | ENSG00000179021  | C3orf38      | 2.80  | 3.60 |
| ENST00000490574 | TFG-003        | ENSG00000114354  | TFG          | 2.58  | 5.35 |
| ENST00000361309 | CD47-004       | ENSG00000196776  | CD47         | 2.40  | 0.69 |
| ENST00000478182 | CD80-002       | ENSG00000121594  | CD80         | 4.73  | 0.51 |
| ENST00000463729 | CD80-003       | ENSG00000121594  | CD80         | 4.65  | 3.23 |
| ENST00000478399 | ADPRH-001      | ENSG00000144843  | ADPRH        | 2.33  | 3.46 |
| ENST00000500908 | AC023494-201   | ENSG00000247078  | AC023494.1   | 2.28  | 1.46 |
| ENST00000295633 | FSTL1-001      | ENSG00000163430  | FSTL1        | 2.19  | 1.12 |
| ENST00000492382 | PARP9-004      | ENSG00000138496  | PARP9        | 4.07  | 1.69 |
| ENST00000462315 | PARP9-003      | ENSG00000138496  | PARP9        | 3.71  | 0.65 |
| ENST00000296161 | DTX3L-001      | ENSG00000163840  | DTX3L        | 2.90  | 0.27 |
| ENST00000483793 | PARP15-003     | ENSG00000173200  | PARP15       | 2.83  | 0.81 |
| ENST00000464300 | PARP15-001     | ENSG00000173200  | PARP15       | 2.94  | 2.42 |
| ENST00000310366 | PARP15-002     | ENSG00000173200  | PARP15       | 3.03  | 4.99 |
| ENST00000398157 | PARP14-203     | ENSG00000173193  | PARP14       | 3.71  | 5.67 |
| ENST00000499221 | AC092983-201   | ENSG00000245009  | AC092983.1   | 2.47  | 2.11 |
| ENST00000319340 | CHST13-201     | ENSG00000180767  | CHST13       | -2.70 | 0.50 |
| ENST00000392981 | XRN1-004       | ENSG00000114127  | XRN1         | 3.11  | 0.57 |
| ENST00000463916 | XRN1-003       | ENSG00000114127  | XRN1         | 3.25  | 2.60 |
| ENST00000501539 | AC023508-201   | ENSG00000247996  | AC023508.2   | 2.54  | 1.01 |
| ENST00000502194 | AC023508-201   | ENSG00000247567  | AC023508.1   | 3.15  | 1.05 |
| ENST00000309575 | CHST2-001      | ENSG00000175040  | CHST2        | 2.40  | 0.83 |
| ENST00000493432 | PLSCR1-005     | ENSG00000188313  | PLSCR1       | 4.97  | 0.81 |
| ENST00000448787 | PLSCR1-003     | ENSG00000188313  | PLSCR1       | 5.69  | 3.39 |
| ENST00000483300 | PLSCR1-018     | ENSG00000188313  | PLSCR1       | 5.80  | 2.55 |
| ENST00000470496 | PLSCR1-020     | ENSG00000188313  | PLSCR1       | 5.26  | 2.63 |
| ENST00000462666 | PLSCR1-014     | ENSG00000188313  | PLSCR1       | 4.78  | 5.40 |
| ENST00000325602 | P2RY13-001     | ENSG00000181631  | P2RY13       | -2.79 | 1.57 |
| ENST00000492569 | RP11-292E2-001 | ENSG00000238755  | RP11-292E2.3 | 3.53  | 0.81 |

|                 |                |                  |              |       |      |
|-----------------|----------------|------------------|--------------|-------|------|
| ENST00000295927 | PTX3-001       | ENSG00000163661  | PTX3         | 2.42  | 0.95 |
| ENST00000468627 | RP11-12N13-001 | ENSG00000244429  | RP11-12N13.1 | 2.26  | 0.35 |
| ENST00000420541 | TNFSF10-002    | ENSG00000121858  | TNFSF10      | 8.08  | 1.86 |
| ENST00000357390 | MFN1-002       | ENSG00000171109  | MFN1         | 3.27  | 3.17 |
| ENST00000483867 | RP11-145M9-001 | ENSG00000181260  | RP11-145M9.2 | 2.19  | 1.43 |
| ENST00000265598 | LAMP3-001      | ENSG00000078081  | LAMP3        | 6.10  | 1.77 |
| ENST00000259030 | RTP4-001       | ENSG00000136514  | RTP4         | 4.23  | 0.29 |
| ENST00000315470 | C3orf59-201    | ENSG00000180611  | C3orf59      | 2.40  | 1.99 |
| ENST00000489628 | TNK2-018       | ENSG00000061938  | TNK2         | 1.90  | 3.24 |
| ENST00000430929 | TNK2-017       | ENSG00000061938  | TNK2         | 2.34  | 5.12 |
| ENST00000502036 | AC124944-201   | ENSG00000245211  | AC124944.4   | 2.09  | 4.68 |
| ENST00000424819 | AC124944-001   | ENSG00000226155  | AC124944.1   | 2.69  | 1.82 |
| ENST00000397544 | ZDHHC19-001    | ENSG00000163958  | ZDHHC19      | -2.95 | 2.00 |
| ENST00000497422 | ZDHHC19-005    | ENSG00000163958  | ZDHHC19      | -3.52 | 1.81 |
| ENST00000486020 | AC069257-201   | ENSG00000244636  | AC069257.4   | -2.55 | 1.96 |
| ENST00000441275 | BDH1-002       | ENSG00000161267  | BDH1         | -2.71 | 1.51 |
| ENST00000500402 | AC128709-201   | ENSG00000247754  | AC128709.2   | -2.58 | 1.20 |
| ENST00000273582 | KIAA0226-001   | ENSG00000145016  | KIAA0226     | 2.85  | 0.38 |
| ENST00000455374 | KIAA0226-203   | ENSG00000145016  | KIAA0226     | 2.61  | 5.13 |
| ENST00000337190 | MXD4-201       | ENSG00000123933  | MXD4         | -2.17 | 0.61 |
| ENST00000360265 | AFAP1-001      | ENSG00000196526  | AFAP1        | 4.30  | 4.53 |
| ENST00000226279 | CD38-001       | ENSG00000004468  | CD38         | 9.56  | 1.91 |
| ENST00000226299 | LAP3-001       | ENSG00000002549  | LAP3         | 3.77  | 0.49 |
| ENST00000382114 | LGI2-001       | ENSG00000153012  | LGI2         | -3.28 | 1.75 |
| ENST00000282970 | LGI2-201       | ENSG00000153012  | LGI2         | -3.66 | 1.75 |
| ENST00000264864 | PI4K2B-001     | ENSG00000038210  | PI4K2B       | 2.64  | 0.84 |
| ENST00000303965 | ARAP2-001      | ENSG000000047365 | ARAP2        | 2.48  | 0.78 |
| ENST00000381799 | RHOH-001       | ENSG00000168421  | RHOH         | 3.80  | 0.94 |
| ENST00000248706 | RASL11B-001    | ENSG00000128045  | RASL11B      | -3.16 | 0.38 |
| ENST00000443143 | AC116049-201   | ENSG00000236562  | AC116049.2   | 4.06  | 0.63 |
| ENST00000417478 | RUFY3-201      | ENSG00000018189  | RUFY3        | 2.12  | 3.50 |
| ENST00000307407 | IL8-001        | ENSG00000169429  | IL8          | 6.84  | 1.78 |
| ENST00000395761 | CXCL1-201      | ENSG00000163739  | CXCL1        | 4.70  | 1.22 |
| ENST00000296026 | CXCL3-201      | ENSG00000163734  | CXCL3        | 4.19  | 1.13 |
| ENST00000264492 | CXCL2-201      | ENSG00000081041  | CXCL2        | 3.56  | 1.01 |
| ENST00000500608 | AC093677-201   | ENSG00000245879  | AC093677.1   | 2.32  | 0.96 |
| ENST00000244869 | EREG-001       | ENSG00000124882  | EREG         | 6.13  | 1.45 |
| ENST00000335927 | RASGEF1B-202   | ENSG00000138670  | RASGEF1B     | 2.41  | 0.88 |
| ENST00000454730 | HPSE-201       | ENSG00000173083  | HPSE         | 2.85  | 0.56 |
| ENST00000264409 | AGPAT9-002     | ENSG00000138678  | AGPAT9       | -3.07 | 3.74 |
| ENST00000295908 | PPM1K-001      | ENSG00000163644  | PPM1K        | 4.56  | 0.34 |
| ENST00000380265 | HERC6-203      | ENSG00000138642  | HERC6        | 5.13  | 5.67 |
| ENST00000264350 | HERC5-001      | ENSG00000138646  | HERC5        | 7.64  | 0.62 |
| ENST00000296414 | DAPP1-201      | ENSG00000070190  | DAPP1        | 2.86  | 0.71 |
| ENST00000356736 | SLC39A8-001    | ENSG00000138821  | SLC39A8      | 2.33  | 1.12 |
| ENST00000226574 | NFKB1-001      | ENSG00000109320  | NFKB1        | 2.31  | 0.36 |
| ENST00000265171 | EGF-001        | ENSG00000138798  | EGF          | 2.20  | 1.37 |
| ENST00000441170 | AC092661-002   | ENSG00000213492  | AC092661.2   | 5.80  | 0.60 |
| ENST00000306802 | KIAA1109-009   | ENSG00000138688  | KIAA1109     | 2.43  | 1.51 |
| ENST00000320650 | IL15-002       | ENSG00000164136  | IL15         | 4.55  | 3.38 |
| ENST00000477265 | IL15-003       | ENSG00000164136  | IL15         | 4.15  | 1.96 |
| ENST00000394159 | IL15-201       | ENSG00000164136  | IL15         | 3.50  | 3.91 |
| ENST00000296578 | OTUD4-201      | ENSG00000164164  | OTUD4        | 2.92  | 7.34 |
| ENST00000500963 | AC096757-201   | ENSG00000245154  | AC096757.3   | 2.51  | 2.93 |
| ENST00000411937 | DCLK2-204      | ENSG00000170390  | DCLK2        | -4.72 | 2.80 |
| ENST00000502034 | AC106865-201   | ENSG00000245126  | AC106865.1   | 2.69  | 2.20 |
| ENST00000260010 | TLR2-201       | ENSG00000137462  | TLR2         | 2.54  | 0.52 |
| ENST00000455639 | GUCY1A3-205    | ENSG00000164116  | GUCY1A3      | 3.50  | 1.75 |
| ENST00000264431 | RAPGEF2-201    | ENSG00000109756  | RAPGEF2      | 2.72  | 0.95 |
| ENST00000393743 | DDX60-202      | ENSG00000137628  | DDX60        | 4.47  | 0.97 |
| ENST00000393739 | DDX60-201      | ENSG00000137628  | DDX60        | 3.90  | 0.63 |
| ENST00000260184 | DDX60L-201     | ENSG00000181381  | DDX60L       | 3.37  | 0.91 |
| ENST00000457303 | AC107214-201   | ENSG00000232648  | AC107214.3   | -2.39 | 1.22 |
| ENST00000281455 | ACSL1-201      | ENSG00000151726  | ACSL1        | 2.10  | 1.36 |
| ENST00000296795 | TLR3-201       | ENSG00000164342  | TLR3         | 5.61  | 1.06 |
| ENST00000230859 | POLS-001       | ENSG00000112941  | POLS         | 2.53  | 0.53 |
| ENST00000342362 | PRLR-203       | ENSG00000113494  | PRLR         | 3.06  | 3.51 |
| ENST00000343305 | IL7R-201       | ENSG00000168685  | IL7R         | 3.07  | 6.20 |
| ENST00000303115 | IL7R-001       | ENSG00000168685  | IL7R         | 3.55  | 0.45 |
| ENST00000339788 | DAB2-202       | ENSG00000153071  | DAB2         | -3.68 | 4.76 |
| ENST00000302472 | PTGER4-001     | ENSG00000171522  | PTGER4       | 2.39  | 0.63 |

|                 |                   |                  |                 |       |      |
|-----------------|-------------------|------------------|-----------------|-------|------|
| ENST00000388827 | CCDC152-202       | ENSG00000198865  | CCDC152         | -4.56 | 2.60 |
| ENST00000500570 | AC008875-201      | ENSG00000245900  | AC008875.2      | 2.70  | 0.34 |
| ENST00000296585 | ITGA2-001         | ENSG00000164171  | ITGA2           | 3.31  | 1.42 |
| ENST00000424459 | GPBP1-203         | ENSG000000062194 | GPBP1           | 2.41  | 3.20 |
| ENST00000296596 | ELOVL7-201        | ENSG00000164181  | ELOVL7          | 2.53  | 2.31 |
| ENST00000340159 | NLN-201           | ENSG00000123213  | NLN             | 2.36  | 3.15 |
| ENST00000256447 | CD180-001         | ENSG00000134061  | CD180           | -3.03 | 0.80 |
| ENST00000322348 | GCNT4-001         | ENSG00000176928  | GCNT4           | 4.46  | 1.57 |
| ENST00000442824 | AC116347-201      | ENSG00000238000  | AC116347.1      | 2.92  | 0.43 |
| ENST00000427199 | TICAM2-001        | ENSG00000243414  | TICAM2          | 1.96  | 0.81 |
| ENST00000261366 | LMNB1-001         | ENSG00000113368  | LMNB1           | 2.86  | 0.50 |
| ENST00000472034 | LMNB1-004         | ENSG00000113368  | LMNB1           | 4.10  | 3.60 |
| ENST00000484340 | LMNB1-008         | ENSG00000113368  | LMNB1           | 3.03  | 1.97 |
| ENST00000200652 | SLC22A4-001       | ENSG00000197208  | SLC22A4         | 3.23  | 0.71 |
| ENST00000378953 | C5orf56-002       | ENSG00000197536  | C5orf56         | 3.10  | 2.24 |
| ENST00000337752 | C5orf56-001       | ENSG00000197536  | C5orf56         | 3.52  | 0.45 |
| ENST00000461203 | C5orf56-004       | ENSG00000197536  | C5orf56         | 3.69  | 1.36 |
| ENST00000443093 | AC116366-001      | ENSG00000234290  | AC116366.1      | 3.83  | 2.31 |
| ENST00000245414 | IRF1-001          | ENSG00000125347  | IRF1            | 3.41  | 0.72 |
| ENST00000421011 | IRF1-201          | ENSG00000125347  | IRF1            | 3.60  | 0.30 |
| ENST00000405885 | IRF1-008          | ENSG00000125347  | IRF1            | 3.72  | 0.39 |
| ENST00000378679 | SHROOM1-001       | ENSG00000164403  | SHROOM1         | -3.49 | 2.89 |
| ENST00000433412 | PHF15-203         | ENSG00000043143  | PHF15           | 3.81  | 2.40 |
| ENST00000395003 | PHF15-002         | ENSG00000043143  | PHF15           | 3.18  | 0.45 |
| ENST00000470876 | PHF15-004         | ENSG00000043143  | PHF15           | 3.43  | 1.76 |
| ENST00000430087 | PHF15-006         | ENSG00000043143  | PHF15           | 3.45  | 2.97 |
| ENST00000449031 | C5orf20-001       | ENSG00000235739  | C5orf20         | 2.21  | 0.46 |
| ENST00000499862 | AC135457-201      | ENSG00000246304  | AC135457.3      | 2.69  | 0.85 |
| ENST00000417127 | TNIP1-203         | ENSG00000145901  | TNIP1           | 2.05  | 3.63 |
| ENST00000435489 | NIPAL4-202        | ENSG00000172548  | NIPAL4          | 3.12  | 2.74 |
| ENST00000499754 | AC020894-201      | ENSG00000244960  | AC020894.1      | -3.79 | 2.33 |
| ENST00000046794 | LCP2-201          | ENSG00000043462  | LCP2            | 2.26  | 0.49 |
| ENST00000311601 | SH3PXD2B-201      | ENSG00000174705  | SH3PXD2B        | 2.76  | 0.51 |
| ENST00000390654 | COL23A1-001       | ENSG00000050767  | COL23A1         | -2.22 | 2.92 |
| ENST00000361132 | RASGEF1C-002      | ENSG00000146090  | RASGEF1C        | -2.66 | 1.87 |
| ENST00000412334 | IRF4-201          | ENSG00000137265  | IRF4            | 3.74  | 4.05 |
| ENST00000500521 | AL357054-201      | ENSG00000247005  | AL357054.2      | 8.25  | 1.38 |
| ENST00000380874 | FOXC1-001         | ENSG00000054598  | FOXC1           | 3.85  | 1.20 |
| ENST00000499208 | AL133351-201      | ENSG00000247767  | AL133351.2      | 4.49  | 1.62 |
| ENST00000380698 | SERPINB9-001      | ENSG00000170542  | SERPINB9        | 4.25  | 0.60 |
| ENST00000380409 | RIPK1-201         | ENSG00000137275  | RIPK1           | 2.59  | 3.57 |
| ENST00000441301 | F13A1-203         | ENSG00000124491  | F13A1           | -6.12 | 2.01 |
| ENST00000379802 | DSP-001           | ENSG00000096696  | DSP             | 2.65  | 2.19 |
| ENST00000379597 | GCNT2-003         | ENSG00000111846  | GCNT2           | 2.36  | 2.34 |
| ENST00000339240 | NEDD9-201         | ENSG00000111859  | NEDD9           | 4.54  | 3.56 |
| ENST00000399469 | HIVEP1-003        | ENSG00000095951  | HIVEP1          | 2.63  | 2.41 |
| ENST00000379375 | EDN1-001          | ENSG00000078401  | EDN1            | 5.74  | 1.99 |
| ENST00000259727 | GMPR-001          | ENSG00000137198  | GMPR            | 6.27  | 0.56 |
| ENST00000424923 | DEK-202           | ENSG00000124795  | DEK             | 2.31  | 3.74 |
| ENST00000429054 | RNF144B-202       | ENSG00000137393  | RNF144B         | 2.81  | 0.37 |
| ENST00000259939 | RNF144B-001       | ENSG00000137393  | RNF144B         | 2.92  | 0.50 |
| ENST00000259698 | FAM65B-001        | ENSG00000111913  | FAM65B          | 7.50  | 1.07 |
| ENST00000397093 | RP3-522P13-001    | ENSG00000213972  | RP3-522P13.3    | -3.53 | 1.54 |
| ENST00000349458 | TRIM38-201        | ENSG00000112343  | TRIM38          | 2.32  | 0.87 |
| ENST00000289361 | BTN3A1-001        | ENSG00000026950  | BTN3A1          | 2.44  | 3.87 |
| ENST00000480110 | BTN3A3-003        | ENSG00000111801  | BTN3A3          | 2.68  | 2.82 |
| ENST00000490254 | BTN3A3-011        | ENSG00000111801  | BTN3A3          | 2.18  | 3.50 |
| ENST00000482257 | HLA-F-009         | ENSG00000204642  | HLA-F           | 2.63  | 0.43 |
| ENST00000485513 | HLA-F-011         | ENSG00000204642  | HLA-F           | 3.49  | 3.98 |
| ENST00000429294 | HLA-F-006         | ENSG00000204642  | HLA-F           | 2.17  | 0.53 |
| ENST00000484704 | HLA-F-012         | ENSG00000204642  | HLA-F           | 4.15  | 3.38 |
| ENST00000441380 | IFITM4P-001       | ENSG00000235821  | IFITM4P         | 4.44  | 0.94 |
| ENST00000430151 | HLA-K-001         | ENSG00000230795  | HLA-K           | 2.18  | 3.90 |
| ENST00000454678 | TRIM26-002        | ENSG00000234127  | TRIM26          | 3.11  | 3.87 |
| ENST00000480999 | TRIM26-004        | ENSG00000234127  | TRIM26          | 2.71  | 4.39 |
| ENST00000493699 | HLA-E-003         | ENSG00000204592  | HLA-E           | 2.28  | 0.97 |
| ENST00000399196 | C6orf214-001      | ENSG00000214894  | C6orf214        | 2.75  | 1.52 |
| ENST00000412585 | HLA-B-001         | ENSG00000234745  | HLA-B           | 1.03  | 0.34 |
| ENST00000383320 | HCP5-201          | ENSG00000206337  | HCP5            | 3.60  | 1.73 |
| ENST00000449264 | TNF-001           | ENSG00000232810  | TNF             | 5.77  | 0.87 |
| ENST00000419679 | XXbac-BPG32J3-001 | ENSG00000235663  | XXbac-BPG32J3.1 | -2.60 | 1.68 |

|                 |                     |                 |                   |       |      |
|-----------------|---------------------|-----------------|-------------------|-------|------|
| ENST00000375651 | HSPA1A-001          | ENSG00000204389 | HSPA1A            | 2.16  | 0.72 |
| ENST00000374897 | TAP2-001            | ENSG00000204267 | TAP2              | 3.48  | 0.44 |
| ENST00000428917 | TAP2-201            | ENSG00000204267 | TAP2              | 2.98  | 0.57 |
| ENST00000374882 | PSMB8-002           | ENSG00000204264 | PSMB8             | 2.13  | 0.37 |
| ENST00000354258 | TAP1-001            | ENSG00000168394 | TAP1              | 4.28  | 0.43 |
| ENST00000415067 | XXbac-BPG246D15-006 | ENSG00000204261 | XXbac-BPG246D15.6 | 3.94  | 1.89 |
| ENST00000414474 | PSMB9-006           | ENSG00000240065 | PSMB9             | 4.13  | 5.31 |
| ENST00000453265 | PSMB9-201           | ENSG00000240065 | PSMB9             | 3.60  | 0.71 |
| ENST00000374859 | PSMB9-001           | ENSG00000240065 | PSMB9             | 3.57  | 0.43 |
| ENST00000341486 | HLA-DMA-201         | ENSG00000204257 | HLA-DMA           | -2.98 | 3.96 |
| ENST00000454398 | HLA-DPA3-001        | ENSG00000237398 | HLA-DPA3          | 4.87  | 1.44 |
| ENST00000339867 | RP3-391O22-001      | ENSG00000196114 | RP3-391O22.1      | 3.96  | 0.88 |
| ENST00000316637 | DEF6-001            | ENSG00000023892 | DEF6              | -2.70 | 0.71 |
| ENST00000454686 | RP1-193M11-001      | ENSG00000213500 | RP1-193M11.1      | 3.99  | 0.80 |
| ENST00000373451 | FTSJD2-001          | ENSG00000137200 | FTSJD2            | 2.68  | 0.34 |
| ENST00000475364 | FTSJD2-004          | ENSG00000137200 | FTSJD2            | 3.03  | 5.27 |
| ENST00000297153 | MDGA1-201           | ENSG00000112139 | MDGA1             | 4.36  | 3.23 |
| ENST00000373401 | MDGA1-001           | ENSG00000112139 | MDGA1             | 4.06  | 2.77 |
| ENST00000437044 | TREML1-203          | ENSG00000161911 | TREML1            | -2.72 | 2.00 |
| ENST00000446507 | PTCRA-203           | ENSG00000171611 | PTCRA             | -2.48 | 0.83 |
| ENST00000393882 | GTPBP2-203          | ENSG00000172432 | GTPBP2            | 2.12  | 5.65 |
| ENST00000478660 | RUNX2-001           | ENSG00000124813 | RUNX2             | 3.23  | 2.34 |
| ENST00000416077 | RP3-437C15-001      | ENSG00000232702 | RP3-437C15.1      | 3.07  | 1.03 |
| ENST00000370336 | DDX43-001           | ENSG00000080007 | DDX43             | 2.51  | 1.20 |
| ENST00000370315 | C6orf150-002        | ENSG00000164430 | C6orf150          | 3.43  | 0.34 |
| ENST00000336032 | PNRC1-001           | ENSG00000146278 | PNRC1             | 3.02  | 0.51 |
| ENST00000368850 | SLC16A10-002        | ENSG00000112394 | SLC16A10          | -2.81 | 1.75 |
| ENST00000359831 | TRAF3IP2-005        | ENSG00000056972 | TRAF3IP2          | 3.04  | 4.47 |
| ENST00000359564 | DSE-201             | ENSG00000111817 | DSE               | 2.33  | 1.42 |
| ENST00000368605 | FAM26F-001          | ENSG00000188820 | FAM26F            | 7.45  | 1.83 |
| ENST00000368604 | FAM26F-003          | ENSG00000188820 | FAM26F            | 4.78  | 3.48 |
| ENST00000368123 | AKAP7-001           | ENSG00000118507 | AKAP7             | 2.12  | 2.06 |
| ENST00000237289 | TNFAIP3-001         | ENSG00000118503 | TNFAIP3           | 3.92  | 0.69 |
| ENST00000012134 | HIVEP2-002          | ENSG00000010818 | HIVEP2            | 3.11  | 4.41 |
| ENST00000367582 | PHACTR2-201         | ENSG00000112419 | PHACTR2           | 2.25  | 2.98 |
| ENST00000367568 | STX11-001           | ENSG00000135604 | STX11             | 3.30  | 0.77 |
| ENST00000416573 | ZC3H12D-202         | ENSG00000178199 | ZC3H12D           | 2.34  | 4.29 |
| ENST00000409694 | SYNE1-015           | ENSG00000131018 | SYNE1             | -2.48 | 2.91 |
| ENST00000265198 | IPCEF1-001          | ENSG00000074706 | IPCEF1            | -3.10 | 2.14 |
| ENST00000462408 | TIAM2-001           | ENSG00000146426 | TIAM2             | 2.22  | 0.56 |
| ENST00000367089 | DYNLT1-001          | ENSG00000146425 | DYNLT1            | 2.28  | 0.22 |
| ENST00000367066 | TAGAP-001           | ENSG00000164691 | TAGAP             | 3.42  | 0.40 |
| ENST00000367061 | TAGAP-201           | ENSG00000164691 | TAGAP             | 4.12  | 0.90 |
| ENST00000501526 | AL035530-201        | ENSG00000246620 | AL035530.1        | 2.99  | 0.59 |
| ENST00000499555 | AL035530-201        | ENSG00000245892 | AL035530.2        | 2.39  | 0.91 |
| ENST00000430078 | RP3-393E18-001      | ENSG00000237927 | RP3-393E18.1      | 2.86  | 1.02 |
| ENST00000427974 | RP1-56L9-001        | ENSG00000224073 | RP1-56L9.2        | 3.27  | 1.19 |
| ENST00000367055 | SOD2-002            | ENSG00000112096 | SOD2              | 3.98  | 0.80 |
| ENST00000337404 | SOD2-001            | ENSG00000112096 | SOD2              | 4.00  | 1.32 |
| ENST00000499116 | AL135914-201        | ENSG00000248087 | AL135914.3        | 4.06  | 0.72 |
| ENST00000337387 | WTAP-002            | ENSG00000146457 | WTAP              | 3.03  | 0.57 |
| ENST00000462110 | WTAP-003            | ENSG00000146457 | WTAP              | 2.73  | 3.52 |
| ENST00000297468 | GPR146-201          | ENSG00000164849 | GPR146            | -2.89 | 3.04 |
| ENST00000396946 | CARD11-011          | ENSG00000198286 | CARD11            | -2.95 | 0.59 |
| ENST00000223122 | C1GALT1-001         | ENSG00000106392 | C1GALT1           | 2.21  | 0.68 |
| ENST00000420252 | AC013470-001        | ENSG00000236048 | AC013470.3        | 2.67  | 0.28 |
| ENST00000297029 | SCIN-001            | ENSG00000006747 | SCIN              | 3.20  | 2.74 |
| ENST00000445618 | SCIN-201            | ENSG00000006747 | SCIN              | 2.58  | 3.86 |
| ENST00000435131 | IGF2BP3-202         | ENSG00000136231 | IGF2BP3           | 5.48  | 1.84 |
| ENST00000056233 | NFE2L3-001          | ENSG00000050344 | NFE2L3            | 3.60  | 0.76 |
| ENST00000338523 | SNX10-002           | ENSG00000086300 | SNX10             | 2.58  | 4.05 |
| ENST00000446848 | SNX10-201           | ENSG00000086300 | SNX10             | 3.24  | 0.68 |
| ENST00000451368 | AC004540-001        | ENSG00000225792 | AC004540.2        | 2.36  | 0.59 |
| ENST00000409290 | WIPF3-002           | ENSG00000122574 | WIPF3             | -2.40 | 1.33 |
| ENST00000430537 | AC007036-001        | ENSG00000227017 | AC007036.1        | 2.28  | 1.10 |
| ENST00000323037 | ZNRF2-001           | ENSG00000180233 | ZNRF2             | 2.32  | 0.71 |
| ENST00000319243 | ZNRF2-201           | ENSG00000180233 | ZNRF2             | 2.61  | 0.91 |
| ENST00000442800 | AC006027-002        | ENSG00000244279 | AC006027.2        | 3.79  | 2.35 |
| ENST00000444150 | AC006978-201        | ENSG00000235859 | AC006978.1        | 2.17  | 0.74 |
| ENST00000242210 | NT5C3-001           | ENSG00000122643 | NT5C3             | 5.58  | 2.57 |
| ENST00000415237 | AC004988-001        | ENSG00000203446 | AC004988.1        | 2.19  | 0.34 |

|                 |                |                 |              |       |      |
|-----------------|----------------|-----------------|--------------|-------|------|
| ENST00000242208 | INHBA-001      | ENSG00000122641 | INHBA        | 3.35  | 2.16 |
| ENST00000442711 | INHBA-002      | ENSG00000122641 | INHBA        | 2.95  | 1.34 |
| ENST00000483585 | MYO1G-003      | ENSG00000136286 | MYO1G        | 2.47  | 5.15 |
| ENST00000258775 | NACAD-201      | ENSG00000136274 | NACAD        | 3.47  | 2.04 |
| ENST00000297323 | ADCY1-001      | ENSG00000164742 | ADCY1        | -2.47 | 1.41 |
| ENST00000442064 | RP4-725G10-001 | ENSG00000230191 | RP4-725G10.4 | 5.62  | 0.93 |
| ENST00000360117 | ZNF588-003     | ENSG00000196247 | ZNF588       | 2.90  | 2.27 |
| ENST00000344930 | ZNF588-002     | ENSG00000196247 | ZNF588       | 3.34  | 2.30 |
| ENST00000395391 | ZNF588-001     | ENSG00000196247 | ZNF588       | 3.06  | 3.08 |
| ENST00000338578 | AC006995-201   | ENSG00000241849 | AC006995.3   | 8.33  | 1.11 |
| ENST00000423083 | NCF1B-003      | ENSG00000182487 | NCF1B        | 5.56  | 1.15 |
| ENST00000395060 | CLIP2-002      | ENSG00000106665 | CLIP2        | -2.88 | 3.55 |
| ENST00000473759 | GTF2I-006      | ENSG00000077809 | GTF2I        | 2.12  | 2.25 |
| ENST00000289473 | NCF1-001       | ENSG00000158517 | NCF1         | 7.12  | 0.96 |
| ENST00000486097 | NCF1-004       | ENSG00000158517 | NCF1         | 7.06  | 4.04 |
| ENST00000297905 | NCF1C-001      | ENSG00000165178 | NCF1C        | 7.62  | 0.93 |
| ENST00000248598 | FGL2-001       | ENSG00000127951 | FGL2         | 2.25  | 0.85 |
| ENST00000464213 | CD36-014       | ENSG00000135218 | CD36         | -3.52 | 5.32 |
| ENST00000222390 | HGF-001        | ENSG00000019991 | HGF          | -4.37 | 1.60 |
| ENST00000457544 | HGF-005        | ENSG00000019991 | HGF          | -2.36 | 3.15 |
| ENST00000320415 | AC004894-001   | ENSG00000213530 | AC004894.1   | 2.29  | 2.19 |
| ENST00000265362 | SEMA3A-001     | ENSG00000075213 | SEMA3A       | 3.21  | 1.39 |
| ENST00000380050 | PFTK1-001      | ENSG00000058091 | PFTK1        | 2.41  | 4.28 |
| ENST00000422095 | ANKIB1-002     | ENSG00000001629 | ANKIB1       | 2.17  | 2.77 |
| ENST00000379958 | SAMD9-001      | ENSG00000205413 | SAMD9        | 5.19  | 0.61 |
| ENST00000318238 | SAMD9L-001     | ENSG00000177409 | SAMD9L       | 4.82  | 0.33 |
| ENST00000394472 | SAMD9L-201     | ENSG00000177409 | SAMD9L       | 5.12  | 0.99 |
| ENST00000502018 | AC000119-201   | ENSG00000246295 | AC000119.2   | 6.29  | 4.63 |
| ENST00000412190 | STAG3-022      | ENSG00000066923 | STAG3        | 2.69  | 0.84 |
| ENST00000262935 | AGFG2-201      | ENSG00000106351 | AGFG2        | -2.64 | 1.49 |
| ENST00000474713 | AGFG2-003      | ENSG00000106351 | AGFG2        | -2.89 | 1.86 |
| ENST00000478730 | ORAI2-001      | ENSG00000160991 | ORAI2        | 2.44  | 5.00 |
| ENST00000318724 | ATXN7L1-001    | ENSG00000146776 | ATXN7L1      | 3.30  | 2.05 |
| ENST00000478915 | ATXN7L1-004    | ENSG00000146776 | ATXN7L1      | 2.61  | 3.18 |
| ENST00000222553 | PBEF1-001      | ENSG00000105835 | PBEF1        | 3.37  | 0.76 |
| ENST00000472714 | LAMB1-004      | ENSG00000091136 | LAMB1        | 2.33  | 0.82 |
| ENST00000265440 | TFEC-001       | ENSG00000105967 | TFEC         | 2.43  | 4.47 |
| ENST00000462828 | TFEC-006       | ENSG00000105967 | TFEC         | 2.50  | 0.33 |
| ENST00000452096 | TFEC-201       | ENSG00000105967 | TFEC         | 3.37  | 1.09 |
| ENST00000456775 | ST7OT1-001     | ENSG00000227199 | ST7OT1       | 3.48  | 1.16 |
| ENST00000257696 | C7orf68-001    | ENSG00000135245 | C7orf68      | -2.54 | 0.59 |
| ENST00000432045 | AC058791-001   | ENSG00000226380 | AC058791.1   | 2.63  | 0.88 |
| ENST00000477620 | NUP205-007     | ENSG00000155561 | NUP205       | 2.57  | 1.66 |
| ENST00000242351 | ZC3HAV1-001    | ENSG00000105939 | ZC3HAV1      | 2.92  | 0.72 |
| ENST00000460845 | ZC3HAV1-004    | ENSG00000105939 | ZC3HAV1      | 4.40  | 2.14 |
| ENST00000499543 | AC083868-201   | ENSG00000245286 | AC083868.2   | 2.31  | 0.32 |
| ENST00000429934 | RP11-383F6-001 | ENSG00000229677 | RP11-383F6.1 | 4.40  | 1.75 |
| ENST00000448866 | TBXAS1-003     | ENSG00000059377 | TBXAS1       | -2.24 | 0.64 |
| ENST00000473341 | PARP12-002     | ENSG00000059378 | PARP12       | 2.89  | 0.67 |
| ENST00000488726 | PARP12-003     | ENSG00000059378 | PARP12       | 2.37  | 0.27 |
| ENST00000486511 | EPHB6-005      | ENSG00000106123 | EPHB6        | -2.66 | 2.35 |
| ENST00000494750 | GIMAP4-006     | ENSG00000133574 | GIMAP4       | 3.48  | 3.14 |
| ENST00000430830 | GIMAP4-202     | ENSG00000133574 | GIMAP4       | 2.35  | 0.27 |
| ENST00000500990 | AC069304-201   | ENSG00000248010 | AC069304.1   | 2.47  | 1.69 |
| ENST00000413040 | NUB1-001       | ENSG00000013374 | NUB1         | 3.08  | 3.86 |
| ENST00000355851 | NUB1-002       | ENSG00000013374 | NUB1         | 2.79  | 1.00 |
| ENST00000468404 | NUB1-003       | ENSG00000013374 | NUB1         | 2.48  | 4.67 |
| ENST00000483358 | NUB1-008       | ENSG00000013374 | NUB1         | 4.18  | 2.77 |
| ENST00000453527 | CTSB-205       | ENSG00000164733 | CTSB         | -1.08 | 0.60 |
| ENST00000265807 | SH2D4A-001     | ENSG00000104611 | SH2D4A       | 3.04  | 1.03 |
| ENST00000306793 | GFRA2-201      | ENSG00000168546 | GFRA2        | -3.73 | 1.48 |
| ENST00000276420 | DOK2-001       | ENSG00000147443 | DOK2         | -3.31 | 0.62 |
| ENST00000256412 | ADAMDEC1-001   | ENSG00000134028 | ADAMDEC1     | 2.22  | 0.89 |
| ENST00000330843 | RAB11FIP1-202  | ENSG00000156675 | RAB11FIP1    | -3.01 | 3.89 |
| ENST00000253513 | IDO1-201       | ENSG00000131203 | IDO1         | 10.80 | 2.27 |
| ENST00000392961 | LYN-202        | ENSG00000147507 | LYN          | 3.19  | 2.44 |
| ENST00000403181 | LYN-203        | ENSG00000147507 | LYN          | 2.22  | 0.48 |
| ENST00000452400 | NCOA2-202      | ENSG00000140396 | NCOA2        | 2.50  | 1.15 |
| ENST00000379114 | IL7-203        | ENSG00000104432 | IL7          | 2.73  | 4.37 |
| ENST00000327835 | ZNF704-201     | ENSG00000164684 | ZNF704       | -2.50 | 1.67 |
| ENST00000220751 | RIPK2-201      | ENSG00000104312 | RIPK2        | 2.92  | 0.55 |



|                 |                 |                 |               |       |      |
|-----------------|-----------------|-----------------|---------------|-------|------|
| ENST00000409330 | NBN-003         | ENSG00000104320 | NBN           | 4.07  | 3.11 |
| ENST00000436771 | C8orf56-201     | ENSG00000236939 | C8orf56       | 5.52  | 1.75 |
| ENST00000395861 | BAALC-205       | ENSG00000164929 | BAALC         | 3.85  | 1.96 |
| ENST00000309982 | BAALC-203       | ENSG00000164929 | BAALC         | 3.95  | 1.45 |
| ENST00000239690 | NUDCD1-201      | ENSG00000120526 | NUDCD1        | 2.81  | 3.75 |
| ENST00000378204 | EXT1-001        | ENSG00000182197 | EXT1          | 6.28  | 0.91 |
| ENST00000437196 | EXT1-004        | ENSG00000182197 | EXT1          | 6.79  | 2.03 |
| ENST00000286234 | DEPDC6-201      | ENSG00000155792 | DEPDC6        | -5.05 | 1.60 |
| ENST00000399018 | FER1L6-201      | ENSG00000214814 | FER1L6        | 2.37  | 1.19 |
| ENST00000301258 | PSCA-201        | ENSG00000167653 | PSCA          | -3.05 | 1.19 |
| ENST00000292494 | LY6E-201        | ENSG00000160932 | LY6E          | 2.84  | 0.93 |
| ENST00000429120 | LY6E-202        | ENSG00000160932 | LY6E          | 2.64  | 1.08 |
| ENST00000436759 | PLEC1-209       | ENSG00000178209 | PLEC1         | -1.35 | 0.61 |
| ENST00000313028 | PARP10-201      | ENSG00000178685 | PARP10        | 2.81  | 0.70 |
| ENST00000424149 | CYHR1-204       | ENSG00000187954 | CYHR1         | -2.64 | 2.09 |
| ENST00000483757 | DOCK8-004       | ENSG00000107099 | DOCK8         | 2.22  | 1.06 |
| ENST00000426054 | DOCK8-203       | ENSG00000107099 | DOCK8         | 2.43  | 1.08 |
| ENST00000381652 | JAK2-001        | ENSG00000096968 | JAK2          | 3.23  | 0.92 |
| ENST00000381577 | CD274-001       | ENSG00000120217 | CD274         | 5.09  | 0.57 |
| ENST00000397747 | PDCD1LG2-001    | ENSG00000197646 | PDCD1LG2      | 3.27  | 2.95 |
| ENST00000500325 | AL161909-201    | ENSG00000246447 | AL161909.2    | -2.86 | 1.13 |
| ENST00000495827 | PTPLAD2-003     | ENSG00000188921 | PTPLAD2       | 2.64  | 2.44 |
| ENST00000431203 | IFNWP2-201      | ENSG00000237691 | IFNWP2        | 2.63  | 2.06 |
| ENST00000276927 | IFNA1-001       | ENSG00000197919 | IFNA1         | 9.85  | 1.58 |
| ENST00000453177 | RP11-370B11-001 | ENSG00000236739 | RP11-370B11.1 | 2.48  | 0.50 |
| ENST00000379882 | DDX58-201       | ENSG00000107201 | DDX58         | 5.82  | 1.28 |
| ENST00000379868 | DDX58-002       | ENSG00000107201 | DDX58         | 7.35  | 4.43 |
| ENST00000330899 | DNAJA1-001      | ENSG00000086061 | DNAJA1        | 2.25  | 0.38 |
| ENST00000486056 | CREB3-002       | ENSG00000107175 | CREB3         | 1.97  | 0.89 |
| ENST00000486387 | CBWD7-003       | ENSG00000215126 | CBWD7         | 2.32  | 1.53 |
| ENST00000446290 | RP11-274B18-002 | ENSG00000234506 | RP11-274B18.1 | 2.82  | 0.79 |
| ENST00000436315 | RP11-274B18-001 | ENSG00000224025 | RP11-274B18.2 | 2.24  | 1.57 |
| ENST00000377245 | TJP2-003        | ENSG00000119139 | TJP2          | 3.14  | 0.83 |
| ENST00000490113 | RFK-004         | ENSG00000135002 | RFK           | 2.17  | 2.77 |
| ENST00000343150 | CTSL1-001       | ENSG00000135047 | CTSL1         | 2.27  | 6.43 |
| ENST00000343780 | SEMA4D-001      | ENSG00000187764 | SEMA4D        | 4.15  | 3.04 |
| ENST00000422704 | SEMA4D-005      | ENSG00000187764 | SEMA4D        | 4.13  | 0.80 |
| ENST00000499581 | AL929575-201    | ENSG00000247593 | AL929575.1    | 3.67  | 2.14 |
| ENST00000500574 | AL353764-201    | ENSG00000245383 | AL353764.1    | 2.42  | 0.76 |
| ENST00000355295 | TDRD7-001       | ENSG00000196116 | TDRD7         | 3.33  | 1.89 |
| ENST00000422139 | TDRD7-201       | ENSG00000196116 | TDRD7         | 1.99  | 3.06 |
| ENST00000375018 | ANKS6-201       | ENSG00000165138 | ANKS6         | -2.49 | 2.22 |
| ENST00000238459 | NR4A3-201       | ENSG00000119508 | NR4A3         | 2.26  | 2.00 |
| ENST00000330847 | NR4A3-003       | ENSG00000119508 | NR4A3         | 1.95  | 2.29 |
| ENST00000361820 | GRIN3A-001      | ENSG00000198785 | GRIN3A        | 3.38  | 0.50 |
| ENST00000497048 | KLF4-001        | ENSG00000136826 | KLF4          | 2.67  | 1.76 |
| ENST00000337530 | KIAA1958-001    | ENSG00000165185 | KIAA1958      | 3.15  | 0.58 |
| ENST00000374244 | KIAA1958-002    | ENSG00000165185 | KIAA1958      | 3.48  | 1.85 |
| ENST00000454585 | C9orf110-201    | ENSG00000225684 | C9orf110      | 2.46  | 0.61 |
| ENST00000453010 | C9orf109-001    | ENSG00000231528 | C9orf109      | 2.43  | 0.29 |
| ENST00000288466 | ZNF618-201      | ENSG00000157657 | ZNF618        | 2.77  | 0.39 |
| ENST00000374126 | ZNF618-004      | ENSG00000157657 | ZNF618        | 3.20  | 5.15 |
| ENST00000448809 | C9orf91-201     | ENSG00000157693 | C9orf91       | 2.99  | 0.44 |
| ENST00000482552 | C9orf91-004     | ENSG00000157693 | C9orf91       | 3.61  | 2.87 |
| ENST00000427842 | TNFSF15-201     | ENSG00000181634 | TNFSF15       | 4.79  | 1.59 |
| ENST00000373887 | TRAF1-001       | ENSG00000056558 | TRAF1         | 4.54  | 1.08 |
| ENST00000223642 | C5-001          | ENSG00000106804 | C5            | 4.09  | 0.74 |
| ENST00000286713 | STOM-001        | ENSG00000148175 | STOM          | 2.16  | 0.35 |
| ENST00000481799 | GGTA1-005       | ENSG00000204136 | GGTA1         | -3.21 | 1.20 |
| ENST00000373782 | DAB2IP-010      | ENSG00000136848 | DAB2IP        | 3.27  | 2.43 |
| ENST00000361171 | FAM125B-001     | ENSG00000196814 | FAM125B       | 3.02  | 0.36 |
| ENST00000373176 | AK1-008         | ENSG00000106992 | AK1           | -3.11 | 0.53 |
| ENST00000455981 | RP11-344B5-001  | ENSG00000224307 | RP11-344B5.3  | -4.04 | 1.16 |
| ENST00000444125 | RP11-65J3-003   | ENSG00000233901 | RP11-65J3.4   | -2.72 | 2.45 |
| ENST00000501138 | AL353803-201    | ENSG00000245107 | AL353803.2    | -2.56 | 1.53 |
| ENST00000259339 | TOR1B-001       | ENSG00000136816 | TOR1B         | 3.37  | 0.33 |
| ENST00000420546 | RP13-100B2-001  | ENSG00000227898 | RP13-100B2.1  | 2.78  | 2.02 |
| ENST00000371899 | SLC2A6-001      | ENSG00000160326 | SLC2A6        | 4.11  | 1.11 |
| ENST00000485978 | SLC2A6-003      | ENSG00000160326 | SLC2A6        | 4.22  | 2.22 |
| ENST00000371600 | NPDC1-002       | ENSG00000107281 | NPDC1         | -2.73 | 1.41 |
| ENST00000491734 | EXD3-007        | ENSG00000187609 | EXD3          | -3.58 | 2.50 |

|                 |                    |                 |                  |       |       |
|-----------------|--------------------|-----------------|------------------|-------|-------|
| ENST00000479452 | EXD3-005           | ENSG00000187609 | EXD3             | -2.65 | 3.52  |
| ENST00000341349 | NOXA1-001          | ENSG00000188747 | NOXA1            | -2.98 | 0.78  |
| ENST00000392815 | NOXA1-201          | ENSG00000188747 | NOXA1            | -2.51 | 2.58  |
| ENST00000492278 | PNPLA7-002         | ENSG00000130653 | PNPLA7           | -2.81 | 1.24  |
| ENST00000469998 | PNPLA7-003         | ENSG00000130653 | PNPLA7           | -2.46 | 3.58  |
| ENST00000406427 | PNPLA7-204         | ENSG00000130653 | PNPLA7           | -3.00 | 2.46  |
| ENST00000361899 | J01415-201         | ENSG00000198899 | J01415.24        | -0.80 | 0.30  |
| ENST00000399012 | PLCXD1-001         | ENSG00000182378 | PLCXD1           | -3.05 | 1.90  |
| ENST00000427886 | RP13-297E16-001    | ENSG00000223511 | RP13-297E16.1    | 3.71  | 1.17  |
| ENST00000380693 | MSL3-010           | ENSG00000005302 | MSL3             | 3.08  | 3.61  |
| ENST00000380064 | REPS2-202          | ENSG00000169891 | REPS2            | -2.62 | 3.11  |
| ENST00000469714 | REPS2-004          | ENSG00000169891 | REPS2            | -3.18 | 1.98  |
| ENST00000366134 | RP13-314C10-001    | ENSG00000233785 | RP13-314C10.1    | 4.02  | 1.56  |
| ENST00000422221 | RP11-469E19-001    | ENSG00000237931 | RP11-469E19.1    | 2.56  | 0.64  |
| ENST00000453805 | USP9X-006          | ENSG00000124486 | USP9X            | 2.51  | 7.01  |
| ENST00000378138 | GPR34-002          | ENSG00000171659 | GPR34            | -4.18 | 3.04  |
| ENST00000414389 | KDM6A-002          | ENSG00000147050 | KDM6A            | 2.85  | 3.34  |
| ENST00000431196 | KDM6A-008          | ENSG00000147050 | KDM6A            | 2.48  | 1.19  |
| ENST00000330258 | FAM123B-002        | ENSG00000184675 | FAM123B          | 2.61  | 0.61  |
| ENST00000373177 | HDX-001            | ENSG00000165259 | HDX              | 3.90  | 1.04  |
| ENST00000399417 | RP1-320J15-001     | ENSG00000215007 | RP1-320J15.1     | 2.35  | 0.57  |
| ENST00000361407 | MID2-201           | ENSG00000080561 | MID2             | 2.77  | 2.74  |
| ENST00000420625 | PLS3-201           | ENSG00000102024 | PLS3             | 3.24  | 2.05  |
| ENST00000429967 | APLN-001           | ENSG00000171388 | APLN             | -2.71 | 2.44  |
| ENST00000371064 | ZDHHHC9-005        | ENSG00000188706 | ZDHHHC9          | 2.63  | 5.46  |
| ENST00000427391 | RP11-453F18__B-001 | ENSG00000213468 | RP11-453F18__B.1 | 2.31  | 0.35  |
| ENST00000475361 | FAM122C-006        | ENSG00000156500 | FAM122C          | 2.32  | 0.91  |
| ENST00000379410 | PLEKHN1-001        | ENSG00000187583 | PLEKHN1          | 2.78  | 4.05  |
| ENST00000491024 | PLEKHN1-003        | ENSG00000187583 | PLEKHN1          | 3.11  | 2.47  |
| ENST00000461111 | AGRN-008           | ENSG00000188157 | AGRN             | 3.04  | 4.52  |
| ENST00000475369 | C1orf224-002       | ENSG00000237276 | C1orf224         | 5.29  | 0.83  |
| ENST00000482359 | ARHGEF10L-008      | ENSG00000074964 | ARHGEF10L        | 2.21  | 3.06  |
| ENST00000339145 | IFI6-003           | ENSG00000126709 | IFI6             | 4.18  | 5.56  |
| ENST00000373456 | RNF19B-001         | ENSG00000116514 | RNF19B           | 2.33  | 4.87  |
| ENST00000475935 | ADC-007            | ENSG00000142920 | ADC              | 3.55  | 2.34  |
| ENST00000471012 | ZC3H12A-005        | ENSG00000163874 | ZC3H12A          | 3.17  | 3.69  |
| ENST00000262675 | TTC39A-001         | ENSG00000085831 | TTC39A           | 2.35  | 2.08  |
| ENST00000447329 | RP4-794H19-002     | ENSG00000230812 | RP4-794H19.4     | 3.64  | 1.17  |
| ENST00000438195 | RP4-794H19-001     | ENSG00000230812 | RP4-794H19.4     | 3.91  | 1.39  |
| ENST00000407417 | NFIA-203           | ENSG00000162599 | NFIA             | -2.74 | 2.99  |
| ENST00000371045 | PDE4B-007          | ENSG00000184588 | PDE4B            | 5.93  | 1.88  |
| ENST00000342754 | NEXN-005           | ENSG00000162614 | NEXN             | 7.31  | 2.21  |
| ENST00000486882 | IFI44L-002         | ENSG00000137959 | IFI44L           | 8.94  | 6.56  |
| ENST00000446486 | IFI44-009          | ENSG00000137965 | IFI44            | 4.42  | 4.55  |
| ENST00000370608 | MCOLN2-201         | ENSG00000153898 | MCOLN2           | 5.34  | 2.37  |
| ENST00000417291 | GBP5-202           | ENSG00000154451 | GBP5             | 6.85  | 0.82  |
| ENST00000471903 | FAM72B-006         | ENSG00000188610 | FAM72B           | 2.33  | 1.19  |
| ENST00000425004 | FAM72D-201         | ENSG00000215784 | FAM72D           | 3.09  | 2.13  |
| ENST00000331128 | HIST2H2AB-001      | ENSG00000184270 | HIST2H2AB        | 3.29  | 1.17  |
| ENST00000452671 | RFX5-002           | ENSG00000143390 | RFX5             | 2.30  | 2.56  |
| ENST00000341831 | ATP8B2-202         | ENSG00000143515 | ATP8B2           | 2.25  | 3.11  |
| ENST00000292254 | RUSC1-005          | ENSG00000160753 | RUSC1            | 2.21  | 5.29  |
| ENST00000492592 | ARHGEF11-007       | ENSG00000132694 | ARHGEF11         | 2.91  | 3.97  |
| ENST00000368130 | AIM2-001           | ENSG00000163568 | AIM2             | 8.87  | 1.02  |
| ENST00000302035 | SLAMF1-001         | ENSG00000117090 | SLAMF1           | 4.63  | 1.86  |
| ENST00000458602 | SLAMF7-205         | ENSG00000026751 | SLAMF7           | 2.39  | 10.59 |
| ENST00000444639 | KIAA0040-001       | ENSG00000235750 | KIAA0040         | 4.17  | 2.68  |
| ENST00000366910 | MOSC1-001          | ENSG00000186205 | MOSC1            | -2.76 | 2.51  |
| ENST00000319465 | IL15RA-002         | ENSG00000134470 | IL15RA           | 4.87  | 3.79  |
| ENST00000358499 | PFKFB3-003         | ENSG00000170525 | PFKFB3           | 3.64  | 7.36  |
| ENST00000378747 | OPTN-008           | ENSG00000123240 | OPTN             | 4.43  | 4.42  |
| ENST00000430603 | MAP3K8-001         | ENSG00000107968 | MAP3K8           | 2.43  | 2.84  |
| ENST00000374426 | CXCL12-003         | ENSG00000107562 | CXCL12           | 4.08  | 3.19  |
| ENST00000374370 | ANUBL1-006         | ENSG00000172671 | ANUBL1           | 2.30  | 1.97  |
| ENST00000399298 | TMEM26-202         | ENSG00000196932 | TMEM26           | 2.25  | 1.34  |
| ENST00000354393 | MYPN-002           | ENSG00000138347 | MYPN             | 2.53  | 1.90  |
| ENST00000458208 | ACTA2-201          | ENSG00000107796 | ACTA2            | 2.22  | 0.59  |
| ENST00000371697 | ANKRD1-001         | ENSG00000148677 | ANKRD1           | 6.00  | 1.86  |
| ENST00000370495 | SLC25A28-001       | ENSG00000155287 | SLC25A28         | 2.50  | 4.30  |
| ENST00000370005 | ELOVL3-001         | ENSG00000119915 | ELOVL3           | 4.79  | 0.99  |
| ENST00000454143 | NFKB2-204          | ENSG00000077150 | NFKB2            | 2.94  | 4.66  |

|                 |               |                 |            |       |      |
|-----------------|---------------|-----------------|------------|-------|------|
| ENST00000348655 | IRF7-003      | ENSG00000185507 | IRF7       | 6.04  | 3.14 |
| ENST00000397566 | IRF7-202      | ENSG00000185507 | IRF7       | 2.75  | 2.11 |
| ENST00000330243 | IRF7-001      | ENSG00000185507 | IRF7       | 3.54  | 1.14 |
| ENST00000380725 | CDKN1C-002    | ENSG00000129757 | CDKN1C     | 2.25  | 2.45 |
| ENST00000396847 | TRIM5-004     | ENSG00000132256 | TRIM5      | 3.72  | 3.06 |
| ENST00000394613 | PLA2G16-202   | ENSG00000176485 | PLA2G16    | 3.85  | 2.18 |
| ENST00000313599 | CD163L1-201   | ENSG00000177675 | CD163L1    | -3.66 | 3.53 |
| ENST00000299665 | CLEC4D-201    | ENSG00000166527 | CLEC4D     | 3.81  | 1.27 |
| ENST00000478250 | NR4A1-001     | ENSG00000123358 | NR4A1      | -3.40 | 2.68 |
| ENST00000416617 | IQCD-203      | ENSG00000166578 | IQCD       | -2.61 | 2.07 |
| ENST00000413816 | GLT1D1-202    | ENSG00000151948 | GLT1D1     | 2.44  | 2.56 |
| ENST00000439658 | C14orf182-202 | ENSG00000214900 | C14orf182  | 2.74  | 2.12 |
| ENST00000361529 | C14orf68-201  | ENSG00000140107 | C14orf68   | 3.80  | 1.33 |
| ENST00000348956 | CKB-201       | ENSG00000166165 | CKB        | 4.11  | 3.01 |
| ENST00000392593 | PLD4-001      | ENSG00000166428 | PLD4       | 3.47  | 2.83 |
| ENST00000313559 | C15orf21-004  | ENSG00000179362 | C15orf21   | 4.49  | 2.70 |
| ENST00000267838 | LYSMD2-001    | ENSG00000140280 | LYSMD2     | 3.81  | 2.60 |
| ENST00000499612 | AC068327-201  | ENSG00000246848 | AC068327.1 | -4.23 | 3.11 |
| ENST00000306072 | ISG20-001     | ENSG00000172183 | ISG20      | 9.27  | 2.14 |
| ENST00000359595 | HAPLN3-001    | ENSG00000140511 | HAPLN3     | 7.36  | 1.78 |
| ENST00000300797 | PRRT2-201     | ENSG00000167371 | PRRT2      | 3.89  | 1.04 |
| ENST00000268459 | NKD1-001      | ENSG00000140807 | NKD1       | 2.74  | 1.14 |
| ENST00000308149 | NLRC5-201     | ENSG00000140853 | NLRC5      | 3.38  | 3.26 |
| ENST00000314553 | EXOC3L-201    | ENSG00000179044 | EXOC3L     | 4.49  | 1.52 |
| ENST00000326043 | MAF-001       | ENSG00000178573 | MAF        | -2.76 | 4.43 |
| ENST00000428963 | CENPN-201     | ENSG00000166451 | CENPN      | 2.35  | 3.14 |
| ENST00000378553 | LRRC50-001    | ENSG00000154099 | LRRC50     | 7.81  | 2.04 |
| ENST00000200307 | CCL7-201      | ENSG00000108688 | CCL7       | 6.44  | 2.25 |
| ENST00000394627 | CCL7-003      | ENSG00000108688 | CCL7       | 5.01  | 2.28 |
| ENST00000225840 | CCL8-201      | ENSG00000108700 | CCL8       | 10.60 | 2.27 |
| ENST00000378354 | CCL3L1-201    | ENSG00000205021 | CCL3L1     | 5.41  | 2.34 |
| ENST00000444414 | CCL4L1-208    | ENSG00000205020 | CCL4L1     | 6.30  | 1.93 |
| ENST00000378342 | CCL4L2-201    | ENSG00000197262 | CCL4L2     | 7.27  | 2.30 |
| ENST00000339270 | CCL4L2-002    | ENSG00000197262 | CCL4L2     | 7.61  | 2.04 |
| ENST00000246657 | CCR7-001      | ENSG00000126353 | CCR7       | 8.82  | 1.17 |
| ENST00000357037 | PTRF-201      | ENSG00000177469 | PTRF       | 2.63  | 2.95 |
| ENST00000225964 | COL1A1-001    | ENSG00000108821 | COL1A1     | 2.70  | 1.18 |
| ENST00000393142 | SCPEP1-202    | ENSG00000121064 | SCPEP1     | 2.13  | 3.78 |
| ENST00000428869 | MRO-202       | ENSG00000134042 | MRO        | -2.94 | 2.79 |
| ENST00000221847 | EBI3-201      | ENSG00000105246 | EBI3       | 5.00  | 1.39 |
| ENST00000264825 | NFIX-201      | ENSG00000008441 | NFIX       | 2.39  | 6.47 |
| ENST00000253680 | HSH2D-201     | ENSG00000196684 | HSH2D      | 6.38  | 2.23 |
| ENST00000455515 | FXYP1-202     | ENSG00000221857 | FXYP1      | -2.96 | 2.80 |
| ENST00000474300 | BCL3-006      | ENSG00000069399 | BCL3       | 2.18  | 1.14 |
| ENST00000263265 | PLEKHA4-201   | ENSG00000105559 | PLEKHA4    | 8.03  | 2.74 |
| ENST00000221399 | TULP2-201     | ENSG00000104804 | TULP2      | 3.38  | 2.09 |
| ENST00000358789 | KLK10-202     | ENSG00000129451 | KLK10      | 3.18  | 2.26 |
| ENST00000270458 | CACNG8-001    | ENSG00000142408 | CACNG8     | 5.55  | 1.61 |
| ENST00000448689 | LILRB1-204    | ENSG00000104972 | LILRB1     | 3.33  | 4.38 |
| ENST00000381465 | TRIB2-002     | ENSG00000071575 | TRIB2      | 4.08  | 1.52 |
| ENST00000339598 | OTOF-003      | ENSG00000115155 | OTOF       | 6.91  | 1.71 |
| ENST00000302188 | RBKS-001      | ENSG00000171174 | RBKS       | 2.31  | 2.03 |
| ENST00000436647 | FOSL2-004     | ENSG00000075426 | FOSL2      | 2.19  | 2.77 |
| ENST00000462451 | VAMP5-002     | ENSG00000168899 | VAMP5      | 3.56  | 2.20 |
| ENST00000393805 | ST3GAL5-003   | ENSG00000115525 | ST3GAL5    | 2.15  | 3.52 |
| ENST00000440974 | AC012363-001  | ENSG00000227788 | AC012363.7 | 3.02  | 1.25 |
| ENST00000243347 | TNFAIP6-001   | ENSG00000123610 | TNFAIP6    | 10.14 | 1.39 |
| ENST00000418968 | AC007750-001  | ENSG00000236841 | AC007750.1 | 2.71  | 1.58 |
| ENST00000415236 | AC009948-007  | ENSG00000223960 | AC009948.3 | 2.65  | 2.07 |
| ENST00000428675 | PLCL1-006     | ENSG00000115896 | PLCL1      | 2.43  | 3.76 |
| ENST00000470178 | CFLAR-022     | ENSG00000003402 | CFLAR      | 3.03  | 3.00 |
| ENST00000433692 | AC007283-002  | ENSG00000234431 | AC007283.2 | 2.42  | 2.37 |
| ENST00000392263 | CASP8-009     | ENSG00000064012 | CASP8      | 2.40  | 4.84 |
| ENST00000374155 | RUFY4-002     | ENSG00000188282 | RUFY4      | 4.57  | 2.07 |
| ENST00000419663 | GPBAR1-202    | ENSG00000179921 | GPBAR1     | 2.66  | 4.97 |
| ENST00000444636 | SP140L-004    | ENSG00000185404 | SP140L     | 2.83  | 3.35 |
| ENST00000458341 | SP140L-001    | ENSG00000185404 | SP140L     | 2.31  | 2.62 |
| ENST00000258381 | SP110-002     | ENSG00000135899 | SP110      | 3.82  | 3.49 |
| ENST00000484809 | SNX5-015      | ENSG00000089006 | SNX5       | -2.39 | 1.44 |
| ENST00000498178 | SRC-012       | ENSG00000197122 | SRC        | 2.15  | 3.52 |
| ENST00000462493 | C20orf175-001 | ENSG00000042062 | C20orf175  | 2.61  | 1.71 |

|                 |                 |                 |               |       |      |
|-----------------|-----------------|-----------------|---------------|-------|------|
| ENST00000370091 | RP4-697K14-202  | ENSG00000130589 | RP4-697K14.2  | 7.29  | 3.02 |
| ENST00000348354 | BTG3-002        | ENSG00000154640 | BTG3          | 2.81  | 2.66 |
| ENST00000400558 | C21orf91-002    | ENSG00000154642 | C21orf91      | 2.55  | 2.68 |
| ENST00000288383 | MX1-003         | ENSG00000157601 | MX1           | 7.85  | 4.30 |
| ENST00000326341 | AP000355-001    | ENSG00000242786 | AP000355.1    | 2.95  | 1.17 |
| ENST00000401395 | KIAA1671-202    | ENSG00000197077 | KIAA1671      | 5.64  | 1.93 |
| ENST00000349314 | APOL3-003       | ENSG00000128284 | APOL3         | 5.00  | 4.04 |
| ENST00000403662 | CSF2RB-001      | ENSG00000100368 | CSF2RB        | 3.16  | 3.23 |
| ENST00000462332 | GTPBP1-002      | ENSG00000100226 | GTPBP1        | 2.96  | 3.07 |
| ENST00000482294 | CBX7-002        | ENSG00000100307 | CBX7          | 2.88  | 0.41 |
| ENST00000273221 | IQSEC1-001      | ENSG00000144711 | IQSEC1        | -2.97 | 3.97 |
| ENST00000441346 | AC011816-001    | ENSG00000234073 | AC011816.4    | 2.74  | 2.11 |
| ENST00000307872 | TMEM110-001     | ENSG00000213533 | TMEM110       | 2.87  | 4.42 |
| ENST00000264634 | WNT5A-201       | ENSG00000114251 | WNT5A         | 3.20  | 3.47 |
| ENST00000495160 | HESX1-001       | ENSG00000163666 | HESX1         | 7.17  | 1.46 |
| ENST00000484675 | RP11-779P15-001 | ENSG00000243089 | RP11-779P15.1 | 2.93  | 0.99 |
| ENST00000326172 | NFKBIZ-003      | ENSG00000144802 | NFKBIZ        | 3.89  | 3.40 |
| ENST00000398258 | CD47-001        | ENSG00000196776 | CD47          | 1.95  | 0.91 |
| ENST00000264246 | CD80-001        | ENSG00000121594 | CD80          | 6.08  | 2.59 |
| ENST00000383660 | PARP15-201      | ENSG00000173200 | PARP15        | 3.95  | 2.49 |
| ENST00000465304 | PARP15-005      | ENSG00000173200 | PARP15        | 3.17  | 3.14 |
| ENST00000493645 | PARP15-006      | ENSG00000173200 | PARP15        | 3.48  | 2.37 |
| ENST00000347421 | ATP2C1-202      | ENSG00000017260 | ATP2C1        | 3.12  | 4.55 |
| ENST00000468985 | PLSCR1-008      | ENSG00000188313 | PLSCR1        | 4.53  | 6.63 |
| ENST00000241261 | TNFSF10-001     | ENSG00000121858 | TNFSF10       | 8.55  | 2.53 |
| ENST00000325318 | TCTEX1D2-001    | ENSG00000213123 | TCTEX1D2      | -2.61 | 4.20 |
| ENST00000438983 | HERC6-204       | ENSG00000138642 | HERC6         | 4.05  | 4.44 |
| ENST00000305798 | TSPAN5-001      | ENSG00000168785 | TSPAN5        | 2.47  | 1.00 |
| ENST00000057513 | TNIP3-001       | ENSG00000050730 | TNIP3         | 7.21  | 1.38 |
| ENST00000422544 | PDGFC-202       | ENSG00000145431 | PDGFC         | -2.87 | 2.68 |
| ENST00000456232 | RICTOR-203      | ENSG00000164327 | RICTOR        | 2.19  | 4.46 |
| ENST00000378947 | C5orf56-003     | ENSG00000197536 | C5orf56       | 3.59  | 1.38 |
| ENST00000394020 | ADAM19-201      | ENSG00000135074 | ADAM19        | 4.13  | 3.04 |
| ENST00000420981 | RP11-420G6-001  | ENSG00000230438 | RP11-420G6.1  | 3.61  | 0.87 |
| ENST00000402854 | RP11-367G6-001  | ENSG00000220517 | RP11-367G6.2  | 2.76  | 0.86 |
| ENST00000314332 | HIST1H2BC-201   | ENSG00000180596 | HIST1H2BC     | 2.49  | 1.35 |
| ENST00000289316 | HIST1H2BD-001   | ENSG00000158373 | HIST1H2BD     | 2.39  | 0.99 |
| ENST00000489638 | LTA-003         | ENSG00000226979 | LTA           | 4.31  | 3.34 |
| ENST00000464100 | TAP2-004        | ENSG00000204267 | TAP2          | 3.39  | 2.30 |
| ENST00000467593 | PSMB9-004       | ENSG00000240065 | PSMB9         | 3.65  | 2.11 |
| ENST00000470273 | FGD2-008        | ENSG00000146192 | FGD2          | 2.22  | 3.06 |
| ENST00000354922 | PNRC1-002       | ENSG00000146278 | PNRC1         | 4.36  | 2.67 |
| ENST00000492671 | TRAF3IP2-009    | ENSG00000056972 | TRAF3IP2      | 3.83  | 3.40 |
| ENST00000473330 | FSCN1-002       | ENSG00000075618 | FSCN1         | -2.73 | 4.20 |
| ENST00000398374 | CAMK2B-202      | ENSG00000058404 | CAMK2B        | -3.66 | 4.31 |
| ENST00000463516 | MYO1G-004       | ENSG00000136286 | MYO1G         | 2.64  | 1.37 |
| ENST00000342771 | AUTS2-001       | ENSG00000158321 | AUTS2         | 3.76  | 1.91 |
| ENST00000435988 | NCF1B-001       | ENSG00000182487 | NCF1B         | 7.20  | 1.05 |
| ENST00000357520 | BET1-005        | ENSG00000105829 | BET1          | 2.70  | 1.05 |
| ENST00000413493 | MOSPD3-203      | ENSG00000106330 | MOSPD3        | -2.53 | 2.35 |
| ENST00000474380 | LAMB1-012       | ENSG00000091136 | LAMB1         | 2.82  | 2.75 |
| ENST00000458153 | MKLN1-003       | ENSG00000128585 | MKLN1         | 2.87  | 4.52 |
| ENST00000463000 | WDR86-005       | ENSG00000187260 | WDR86         | 3.50  | 1.22 |
| ENST00000300332 | NKX3-1-201      | ENSG00000167034 | NKX3-1        | 2.90  | 1.41 |
| ENST00000265433 | NBN-001         | ENSG00000104320 | NBN           | 3.00  | 2.51 |
| ENST00000259555 | IFNA13-201      | ENSG00000233816 | IFNA13        | 9.95  | 1.13 |
| ENST00000423632 | RP11-402G3-001  | ENSG00000230054 | RP11-402G3.1  | 2.25  | 1.40 |
| ENST00000408936 | DAB2IP-009      | ENSG00000136848 | DAB2IP        | 4.81  | 2.11 |
| ENST00000360670 | NTNG2-201       | ENSG00000196358 | NTNG2         | 3.82  | 1.89 |
| ENST00000371897 | SLC2A6-002      | ENSG00000160326 | SLC2A6        | 4.20  | 2.87 |
| ENST00000381663 | PLCXD1-201      | ENSG00000182378 | PLCXD1        | -2.76 | 2.08 |
| ENST00000462359 | SLC38A5-006     | ENSG00000017483 | SLC38A5       | 5.87  | 1.07 |
| ENST00000470657 | FAM122C-004     | ENSG00000156500 | FAM122C       | 2.50  | 1.92 |
| ENST00000379236 | TNFRSF4-001     | ENSG00000186827 | TNFRSF4       | 4.30  | 2.36 |
| ENST00000414055 | C1orf224-201    | ENSG00000237276 | C1orf224      | 5.44  | 1.45 |
| ENST00000373836 | PHACTR4-004     | ENSG00000204138 | PHACTR4       | 2.87  | 4.16 |
| ENST00000422952 | GBP1-201        | ENSG00000117228 | GBP1          | 7.05  | 3.28 |
| ENST00000490413 | MOV10-008       | ENSG00000155363 | MOV10         | 2.33  | 3.27 |
| ENST00000420505 | ADAR-203        | ENSG00000160710 | ADAR          | 2.28  | 0.78 |
| ENST00000392405 | RUSC1-202       | ENSG00000160753 | RUSC1         | 2.07  | 5.90 |
| ENST00000471382 | BATF3-003       | ENSG00000123685 | BATF3         | 4.76  | 2.29 |

|                 |                 |                 |               |       |      |
|-----------------|-----------------|-----------------|---------------|-------|------|
| ENST00000435171 | IL15RA-009      | ENSG00000134470 | IL15RA        | 4.94  | 1.80 |
| ENST00000459894 | SFXN2-002       | ENSG00000156398 | SFXN2         | -2.55 | 3.13 |
| ENST00000482993 | RP11-108K14-004 | ENSG00000214279 | RP11-108K14.1 | 2.22  | 2.29 |
| ENST00000382073 | CLEC6A-201      | ENSG00000205846 | CLEC6A        | 3.38  | 1.52 |
| ENST00000432556 | OLR1-202        | ENSG00000173391 | OLR1          | 2.24  | 3.33 |
| ENST00000357825 | SRGAP1-202      | ENSG00000196935 | SRGAP1        | -2.53 | 4.78 |
| ENST00000262401 | SLC46A1-201     | ENSG00000076351 | SLC46A1       | -2.93 | 4.83 |
| ENST00000427581 | LILRB1-007      | ENSG00000104972 | LILRB1        | 4.16  | 2.99 |
| ENST00000464371 | KHK-005         | ENSG00000138030 | KHK           | -3.17 | 2.39 |
| ENST00000451794 | NEURL3-202      | ENSG00000163121 | NEURL3        | 8.62  | 1.43 |
| ENST00000263341 | IL1B-001        | ENSG00000125538 | IL1B          | 6.91  | 2.18 |
| ENST00000478233 | MAP2-013        | ENSG00000078018 | MAP2          | 4.04  | 1.53 |
| ENST00000413284 | SP100-016       | ENSG00000067066 | SP100         | 2.44  | 3.63 |
| ENST00000427522 | RP4-697K14-001  | ENSG00000130589 | RP4-697K14.2  | 5.35  | 3.26 |
| ENST00000472328 | IMPDH2-004      | ENSG00000178035 | IMPDH2        | -2.57 | 2.86 |
| ENST00000492922 | RP11-413E6-002  | ENSG00000242516 | RP11-413E6.5  | 3.49  | 2.34 |
| ENST00000489652 | PARP9-006       | ENSG00000138496 | PARP9         | 4.80  | 4.68 |
| ENST00000471785 | PARP9-005       | ENSG00000138496 | PARP9         | 4.26  | 5.46 |
| ENST00000306602 | CXCL10-201      | ENSG00000169245 | CXCL10        | 11.34 | 3.01 |
| ENST00000501655 | AC025171-201    | ENSG00000246776 | AC025171.2    | 3.49  | 1.38 |
| ENST00000365663 | Y_RNA           | ENSG00000202533 | Y_RNA         | 2.29  | 1.59 |
| ENST00000426696 | TRIM26-201      | ENSG00000234127 | TRIM26        | 2.13  | 0.91 |
| ENST00000452596 | HLA-B-202       | ENSG00000234745 | HLA-B         | 2.04  | 4.97 |
| ENST00000486332 | TAP1-002        | ENSG00000168394 | TAP1          | 3.85  | 2.30 |
| ENST00000367054 | SOD2-201        | ENSG00000112096 | SOD2          | 4.28  | 2.72 |
| ENST00000436911 | TRGC2-001       | ENSG00000227191 | TRGC2         | 3.42  | 0.88 |
| ENST00000431284 | AC004847-201    | ENSG00000231337 | AC004847.1    | 3.23  | 2.31 |
| ENST00000398421 | NCF1-002        | ENSG00000158517 | NCF1          | 7.45  | 2.25 |
| ENST00000394000 | PILRA-005       | ENSG00000085514 | PILRA         | 2.97  | 4.57 |
| ENST00000477392 | RP11-511P7-001  | ENSG00000242258 | RP11-511P7.1  | 5.46  | 1.61 |
| ENST00000412660 | GIMAP4-201      | ENSG00000133574 | GIMAP4        | 2.54  | 2.26 |
| ENST00000483055 | NTNG2-005       | ENSG00000196358 | NTNG2         | 4.31  | 1.31 |
| ENST00000379361 | PTCHD1-002      | ENSG00000165186 | PTCHD1        | 2.42  | 2.54 |
| ENST00000474385 | ZFX-005         | ENSG00000005889 | ZFX           | 2.61  | 2.14 |
| ENST00000297977 | HDX-201         | ENSG00000165259 | HDX           | 3.52  | 1.63 |
| ENST00000497869 | TNFRSF4-002     | ENSG00000186827 | TNFRSF4       | 3.83  | 2.02 |
| ENST00000468348 | C1orf127-003    | ENSG00000175262 | C1orf127      | -3.47 | 2.08 |
| ENST00000358481 | PADI6-201       | ENSG00000197996 | PADI6         | 2.32  | 2.18 |
| ENST00000466782 | ARHGEF10L-009   | ENSG00000074964 | ARHGEF10L     | 2.29  | 3.50 |
| ENST00000447420 | RP4-803A2-001   | ENSG00000239670 | RP4-803A2.2   | 2.53  | 2.08 |
| ENST00000484656 | ADC-008         | ENSG00000142920 | ADC           | 3.25  | 3.24 |
| ENST00000466619 | GSTM1-011       | ENSG00000134184 | GSTM1         | -2.55 | 3.52 |
| ENST00000391154 | U1              | ENSG00000212456 | U1            | 2.36  | 1.11 |
| ENST00000463840 | TSPAN15-008     | ENSG00000099282 | TSPAN15       | -2.63 | 2.01 |
| ENST00000395901 | ARNTL2-204      | ENSG00000029153 | ARNTL2        | 3.20  | 4.38 |
| ENST00000378487 | CLLU1OS-201     | ENSG00000205057 | CLLU1OS       | 2.46  | 1.57 |
| ENST00000250572 | EMR1-201        | ENSG00000174837 | EMR1          | 2.42  | 4.13 |
| ENST00000441512 | AC011515-001    | ENSG00000225370 | AC011515.1    | 2.86  | 1.14 |
| ENST00000442815 | AP001046-001    | ENSG00000237989 | AP001046.2    | 3.55  | 1.70 |
| ENST00000382723 | MSX1-001        | ENSG00000163132 | MSX1          | 5.10  | 1.56 |
| ENST00000360303 | SORCS2-202      | ENSG00000184985 | SORCS2        | 2.97  | 1.43 |
| ENST00000407526 | GRB10-007       | ENSG00000106070 | GRB10         | 2.14  | 4.21 |
| ENST00000423057 | DOCK4-007       | ENSG00000128512 | DOCK4         | 2.07  | 2.81 |
| ENST00000351513 | DPYS-201        | ENSG00000147647 | DPYS          | 2.26  | 1.01 |
| ENST00000474239 | FBXO6-002       | ENSG00000116663 | FBXO6         | 3.38  | 3.69 |
| ENST00000486901 | HSPG2-002       | ENSG00000142798 | HSPG2         | -3.35 | 2.75 |
| ENST00000370751 | IFI44L-001      | ENSG00000137959 | IFI44L        | 9.81  | 1.75 |
| ENST00000415432 | VAV3-202        | ENSG00000134215 | VAV3          | 2.59  | 2.90 |
| ENST00000488160 | MOV10-013       | ENSG00000155363 | MOV10         | 2.57  | 5.28 |
| ENST00000455004 | BX284650-001    | ENSG00000231734 | BX284650.6    | 2.35  | 1.57 |
| ENST00000373214 | KIAA1274-001    | ENSG00000107719 | KIAA1274      | -3.86 | 3.27 |
| ENST00000405308 | MDK-006         | ENSG00000110492 | MDK           | 2.35  | 2.99 |
| ENST00000415415 | CTSC-205        | ENSG00000109861 | CTSC          | 2.49  | 4.48 |
| ENST00000320621 | CTSC-202        | ENSG00000109861 | CTSC          | 3.03  | 4.09 |
| ENST00000203629 | LAG3-201        | ENSG00000089692 | LAG3          | 7.37  | 2.19 |
| ENST00000417623 | TMEM117-202     | ENSG00000139173 | TMEM117       | -2.56 | 3.19 |
| ENST00000420463 | EIF4B-203       | ENSG00000063046 | EIF4B         | -2.74 | 5.24 |
| ENST00000432758 | TRAFD1-203      | ENSG00000135148 | TRAFD1        | 2.57  | 1.31 |
| ENST00000389812 | PLCB2-202       | ENSG00000137841 | PLCB2         | -3.54 | 6.35 |
| ENST00000343510 | EIF2AK2-201     | ENSG00000055332 | EIF2AK2       | 5.58  | 3.68 |
| ENST00000456923 | FN1-011         | ENSG00000115414 | FN1           | 2.80  | 3.93 |

|                 |                |                 |              |       |      |
|-----------------|----------------|-----------------|--------------|-------|------|
| ENST00000382357 | OLIG2-001      | ENSG00000205927 | OLIG2        | 2.50  | 2.46 |
| ENST00000482533 | RCAN1-006      | ENSG00000159200 | RCAN1        | 2.29  | 5.56 |
| ENST00000383668 | CD80-201       | ENSG00000121594 | CD80         | 3.67  | 2.01 |
| ENST00000460683 | PARP14-002     | ENSG00000173193 | PARP14       | 4.61  | 5.72 |
| ENST00000476223 | RP11-383G6-001 | ENSG00000240576 | RP11-383G6.3 | 3.95  | 1.28 |
| ENST00000306621 | CXCL11-001     | ENSG00000169248 | CXCL11       | 11.48 | 2.38 |
| ENST00000284630 | DDX60L-202     | ENSG00000181381 | DDX60L       | 4.06  | 3.59 |
| ENST00000428771 | HES4-201       | ENSG00000188290 | HES4         | 4.32  | 2.50 |
| ENST00000481869 | HES4-003       | ENSG00000188290 | HES4         | 6.00  | 2.41 |
| ENST00000378324 | SERPING1-202   | ENSG00000149131 | SERPING1     | 3.09  | 3.54 |
| ENST00000418919 | GNS-202        | ENSG00000135677 | GNS          | 2.53  | 4.73 |
| ENST00000357167 | BTBD11-004     | ENSG00000151136 | BTBD11       | 2.89  | 2.31 |
| ENST00000300590 | SNX20-001      | ENSG00000167208 | SNX20        | 2.53  | 4.62 |
| ENST00000435374 | MAP2K6-202     | ENSG00000108984 | MAP2K6       | 4.07  | 2.18 |
| ENST00000409631 | OSBPL6-005     | ENSG00000079156 | OSBPL6       | 3.15  | 3.38 |
| ENST00000266041 | ITIH4-001      | ENSG00000055955 | ITIH4        | 4.03  | 3.61 |
| ENST00000461966 | ITIH4-015      | ENSG00000055955 | ITIH4        | 4.33  | 3.41 |
| ENST00000424970 | SLC39A8-201    | ENSG00000138821 | SLC39A8      | 3.34  | 3.77 |
| ENST00000446664 | AC006367-201   | ENSG00000231695 | AC006367.1   | 4.59  | 1.91 |
| ENST00000431069 | RP11-39K24-001 | ENSG00000235917 | RP11-39K24.3 | 3.24  | 2.28 |
| ENST00000429061 | IGHEP2-001     | ENSG00000215285 | IGHEP2       | 2.93  | 2.89 |
| ENST00000405737 | ELF1-002       | ENSG00000120690 | ELF1         | 3.54  | 4.30 |
| ENST00000269209 | FAM59A-002     | ENSG00000141441 | FAM59A       | 3.89  | 2.20 |
| ENST00000255612 | PRAM1-201      | ENSG00000133246 | PRAM1        | -3.13 | 6.60 |
| ENST00000370097 | C20orf195-002  | ENSG00000125531 | C20orf195    | 3.27  | 3.54 |
| ENST00000492928 | PLEKHG3-003    | ENSG00000126822 | PLEKHG3      | 3.01  | 3.38 |
