# Supplementary material for: Identification of Genes Critical for Resistance to Infection by West Nile Virus Using RNA-Seq Analysis
Source: MDPI journal article supplement (doi:10.3390/v5071664), 2013-07-08
Supplement: s1 [file s1]

**Table S2. Differentially expressed transcripts common to all donors**

| Ensembl.Transcript.ID | Transcript.Name | Ensembl.Gene.ID | Gene.Name  | Average Fold change |      |
|-----------------------|-----------------|-----------------|------------|---------------------|------|
|                       |                 |                 |            | log2 fold change    | SD   |
| ENST00000371818       | IFIT3-001       | ENSG00000119917 | IFIT3      | 16.88               | 0.45 |
| ENST00000371804       | IFIT1-001       | ENSG00000185745 | IFIT1      | 16.53               | 0.42 |
| ENST00000371826       | IFIT2-001       | ENSG00000119922 | IFIT2      | 16.35               | 0.89 |
| ENST00000371811       | IFIT3-002       | ENSG00000119917 | IFIT3      | 14.24               | 0.70 |
| ENST00000335760       | APOBEC3B-005    | ENSG00000179750 | APOBEC3B   | 12.36               | 0.33 |
| ENST00000483004       | CFB-013         | ENSG00000243649 | CFB        | 10.75               | 0.66 |
| ENST00000432102       | NCF1B-002       | ENSG00000182487 | NCF1B      | 11.18               | 0.76 |
| ENST00000380205       | IFNA8-001       | ENSG00000120242 | IFNA8      | 10.68               | 1.00 |
| ENST00000251630       | PDGFRL-001      | ENSG00000104213 | PDGFRL     | 9.99                | 0.62 |
| ENST00000389070       | CCL4-201        | ENSG00000129277 | CCL4       | 11.73               | 1.33 |
| ENST00000249116       | APOBEC3A-201    | ENSG00000128383 | APOBEC3A   | 10.27               | 1.02 |
| ENST00000379224       | ISG20-201       | ENSG00000172183 | ISG20      | 11.20               | 1.17 |
| ENST00000306602       | CXCL10-201      | ENSG00000169245 | CXCL10     | 12.88               | 3.01 |
| ENST00000259555       | IFNA13-201      | ENSG00000233816 | IFNA13     | 10.59               | 1.13 |
| ENST00000358756       | CCL4L1-201      | ENSG00000205020 | CCL4L1     | 9.62                | 1.00 |
| ENST00000380206       | IFNA2-001       | ENSG00000188379 | IFNA2      | 11.49               | 1.24 |
| ENST00000253513       | IDO1-201        | ENSG00000131203 | IDO1       | 12.15               | 2.27 |
| ENST00000276927       | IFNA1-001       | ENSG00000197919 | IFNA1      | 10.54               | 1.58 |
| ENST00000257570       | OASL-001        | ENSG00000135114 | OASL       | 9.80                | 0.90 |
| ENST00000382040       | RSAD2-001       | ENSG00000134321 | RSAD2      | 10.97               | 1.93 |
| ENST00000481829       | AIM2-003        | ENSG00000163568 | AIM2       | 8.73                | 0.28 |
| ENST00000368130       | AIM2-001        | ENSG00000163568 | AIM2       | 9.40                | 1.02 |
| ENST00000464998       | NEXN-007        | ENSG00000162614 | NEXN       | 10.10               | 0.86 |
| ENST00000433458       | NCF1-014        | ENSG00000158517 | NCF1       | 10.52               | 0.98 |
| ENST00000306621       | CXCL11-001      | ENSG00000169248 | CXCL11     | 12.35               | 2.38 |
| ENST00000472581       | CFB-004         | ENSG00000243649 | CFB        | 8.88                | 0.74 |
| ENST00000377462       | IRG1-001        | ENSG00000102794 | IRG1       | 11.15               | 1.58 |
| ENST00000243347       | TNFAIP6-001     | ENSG00000123610 | TNFAIP6    | 10.57               | 1.39 |
| ENST00000380232       | IFNB1-002       | ENSG00000171855 | IFNB1      | 11.38               | 1.89 |
| ENST00000389069       | CCL4L2-202      | ENSG00000197262 | CCL4L2     | 8.97                | 1.05 |
| ENST00000225840       | CCL8-201        | ENSG00000108700 | CCL8       | 12.12               | 2.27 |
| ENST00000402522       | TBC1D1-002      | ENSG00000065882 | TBC1D1     | 8.43                | 0.46 |
| ENST00000380229       | IFNW1-001       | ENSG00000177047 | IFNW1      | 9.23                | 1.27 |
| ENST00000370751       | IFI44L-001      | ENSG00000137959 | IFI44L     | 10.61               | 1.75 |
| ENST00000491194       | ADORA2A-006     | ENSG00000128271 | ADORA2A    | 8.84                | 1.06 |
| ENST00000306072       | ISG20-001       | ENSG00000172183 | ISG20      | 10.18               | 2.14 |
| ENST00000241261       | TNFSF10-001     | ENSG00000121858 | TNFSF10    | 9.59                | 2.53 |
| ENST00000298902       | IFI27-201       | ENSG00000165949 | IFI27      | 8.61                | 1.04 |
| ENST00000328221       | IFITM1-201      | ENSG00000185885 | IFITM1     | 8.51                | 1.29 |
| ENST00000461547       | ZBP1-004        | ENSG00000124256 | ZBP1       | 9.27                | 1.27 |
| ENST00000420541       | TNFSF10-002     | ENSG00000121858 | TNFSF10    | 8.85                | 1.86 |
| ENST00000397372       | HSH2D-202       | ENSG00000196684 | HSH2D      | 9.43                | 1.96 |
| ENST00000366113       | CCL5-002        | ENSG00000161570 | CCL5       | 10.30               | 1.71 |
| ENST00000380222       | IFNA14-001      | ENSG00000228083 | IFNA14     | 10.28               | 1.61 |
| ENST00000449498       | IFNA13-001      | ENSG00000233816 | IFNA13     | 9.43                | 1.46 |
| ENST00000264350       | HERC5-001       | ENSG00000138646 | HERC5      | 7.73                | 0.62 |
| ENST00000453793       | ZBP1-005        | ENSG00000124256 | ZBP1       | 7.60                | 0.42 |
| ENST00000502093       | AC017076-201    | ENSG00000247107 | AC017076.1 | 8.07                | 1.01 |
| ENST00000441683       | USP18-201       | ENSG00000184979 | USP18      | 9.90                | 1.78 |
| ENST00000395822       | ZBP1-003        | ENSG00000124256 | ZBP1       | 8.72                | 1.12 |
| ENST00000340181       | ETV7-001        | ENSG00000010030 | ETV7       | 9.93                | 1.71 |
| ENST00000297439       | DEFB1-001       | ENSG00000164825 | DEFB1      | 8.49                | 0.87 |
| ENST00000246657       | CCR7-001        | ENSG00000126353 | CCR7       | 8.95                | 1.17 |
| ENST00000431042       | SLC2A14-203     | ENSG00000173262 | SLC2A14    | 7.47                | 0.57 |

|                 |                |                 |              |       |      |
|-----------------|----------------|-----------------|--------------|-------|------|
| ENST00000478119 | GCH1-004       | ENSG00000131979 | GCH1         | 10.51 | 1.60 |
| ENST00000398598 | MX1-002        | ENSG00000157601 | MX1          | 10.76 | 3.10 |
| ENST00000338578 | AC006995-201   | ENSG00000241849 | AC006995.3   | 8.62  | 1.11 |
| ENST00000322982 | AC005013-001   | ENSG00000176734 | AC005013.2   | 7.73  | 0.69 |
| ENST00000332579 | IFNE-201       | ENSG00000184995 | IFNE         | 8.18  | 1.19 |
| ENST00000226279 | CD38-001       | ENSG00000004468 | CD38         | 10.28 | 1.91 |
| ENST00000265404 | STAP1-001      | ENSG00000035720 | STAP1        | 8.04  | 1.22 |
| ENST00000411427 | AP001610-001   | ENSG00000228318 | AP001610.1   | 7.77  | 1.00 |
| ENST00000379389 | ISG15-001      | ENSG00000187608 | ISG15        | 7.83  | 1.00 |
| ENST00000368605 | FAM26F-001     | ENSG00000188820 | FAM26F       | 8.29  | 1.83 |
| ENST00000380225 | IFNA21-001     | ENSG00000137080 | IFNA21       | 7.57  | 0.97 |
| ENST00000333625 | IL29-201       | ENSG00000182393 | IL29         | 10.12 | 1.55 |
| ENST00000355754 | GBP4-001       | ENSG00000162654 | GBP4         | 8.20  | 0.98 |
| ENST00000397689 | AC009729-201   | ENSG00000214163 | AC009729.1   | 7.47  | 0.52 |
| ENST00000451794 | NEURL3-202     | ENSG00000163121 | NEURL3       | 8.99  | 1.43 |
| ENST00000297905 | NCF1C-001      | ENSG00000165178 | NCF1C        | 7.70  | 0.93 |
| ENST00000419310 | AC106760-201   | ENSG00000233100 | AC106760.1   | 7.17  | 1.02 |
| ENST00000313640 | EPSTI1-003     | ENSG00000133106 | EPSTI1       | 7.26  | 0.51 |
| ENST00000417291 | GBP5-202       | ENSG00000154451 | GBP5         | 7.02  | 0.82 |
| ENST00000358127 | PAX5-001       | ENSG00000196092 | PAX5         | 8.95  | 1.49 |
| ENST00000443956 | NCF1-003       | ENSG00000158517 | NCF1         | 9.80  | 1.69 |
| ENST00000394662 | RP4-644F6-001  | ENSG00000225492 | RP4-644F6.2  | 6.55  | 0.35 |
| ENST00000371852 | CH25H-001      | ENSG00000138135 | CH25H        | 7.92  | 1.05 |
| ENST00000422952 | GBP1-201       | ENSG00000117228 | GBP1         | 8.17  | 3.28 |
| ENST00000500521 | AL357054-201   | ENSG00000247005 | AL357054.2   | 8.35  | 1.38 |
| ENST00000293272 | CCL5-001       | ENSG00000161570 | CCL5         | 10.47 | 2.59 |
| ENST00000412609 | AC093063-001   | ENSG00000226025 | AC093063.1   | 7.98  | 1.25 |
| ENST00000339598 | OTOF-003       | ENSG00000115155 | OTOF         | 7.34  | 1.71 |
| ENST00000392583 | OAS2-202       | ENSG00000111335 | OAS2         | 7.05  | 0.97 |
| ENST00000495160 | HESX1-001      | ENSG00000163666 | HESX1        | 7.90  | 1.46 |
| ENST00000470202 | USP41-002      | ENSG00000161133 | USP41        | 7.42  | 1.27 |
| ENST00000292729 | USP41-001      | ENSG00000161133 | USP41        | 7.54  | 0.95 |
| ENST00000296657 | ANKRD33B-201   | ENSG00000164236 | ANKRD33B     | 6.66  | 0.74 |
| ENST00000317669 | SLC38A5-201    | ENSG00000017483 | SLC38A5      | 8.98  | 2.30 |
| ENST00000259698 | FAM65B-001     | ENSG00000111913 | FAM65B       | 7.67  | 1.07 |
| ENST00000235739 | SLAMF1-201     | ENSG00000117090 | SLAMF1       | 7.03  | 0.85 |
| ENST00000229635 | FAM65B-201     | ENSG00000111913 | FAM65B       | 7.40  | 1.06 |
| ENST00000295934 | HESX1-201      | ENSG00000163666 | HESX1        | 7.51  | 1.09 |
| ENST00000357374 | IFNA10-001     | ENSG00000186803 | IFNA10       | 7.13  | 1.08 |
| ENST00000264888 | CXCL9-201      | ENSG00000138755 | CXCL9        | 9.40  | 2.01 |
| ENST00000342754 | NEXN-005       | ENSG00000162614 | NEXN         | 8.75  | 2.21 |
| ENST00000397250 | IL15RA-203     | ENSG00000134470 | IL15RA       | 7.26  | 1.61 |
| ENST00000259727 | GMPR-001       | ENSG00000137198 | GMPR         | 6.39  | 0.56 |
| ENST00000435988 | NCF1B-001      | ENSG00000182487 | NCF1B        | 7.43  | 1.05 |
| ENST00000478738 | CMPK2-004      | ENSG00000134326 | CMPK2        | 8.66  | 1.89 |
| ENST00000480037 | ZBP1-002       | ENSG00000124256 | ZBP1         | 8.04  | 1.27 |
| ENST00000057513 | TNIP3-001      | ENSG00000050730 | TNIP3        | 7.51  | 1.38 |
| ENST00000394465 | CCL4L2-001     | ENSG00000197262 | CCL4L2       | 8.07  | 1.45 |
| ENST00000239347 | IFNA7-001      | ENSG00000214042 | IFNA7        | 7.06  | 0.98 |
| ENST00000203629 | LAG3-201       | ENSG00000089692 | LAG3         | 7.95  | 2.19 |
| ENST00000215794 | USP18-001      | ENSG00000184979 | USP18        | 6.63  | 0.78 |
| ENST00000330714 | MX2-001        | ENSG00000183486 | MX2          | 6.55  | 0.66 |
| ENST00000417932 | RP11-10J5-001  | ENSG00000226004 | RP11-10J5.1  | 7.64  | 1.05 |
| ENST00000304952 | HES4-001       | ENSG00000188290 | HES4         | 7.46  | 2.04 |
| ENST00000289473 | NCF1-001       | ENSG00000158517 | NCF1         | 7.09  | 0.96 |
| ENST00000370091 | RP4-697K14-202 | ENSG00000130589 | RP4-697K14.2 | 8.94  | 3.02 |
| ENST00000342315 | OAS2-201       | ENSG00000111335 | OAS2         | 5.93  | 0.31 |

|                 |                 |                 |               |       |      |
|-----------------|-----------------|-----------------|---------------|-------|------|
| ENST00000447291 | IL15RA-008      | ENSG00000134470 | IL15RA        | 8.19  | 1.62 |
| ENST00000500182 | AC021937-201    | ENSG00000245625 | AC021937.1    | 8.28  | 1.43 |
| ENST00000396367 | BCL2L14-202     | ENSG00000121380 | BCL2L14       | 8.31  | 1.35 |
| ENST00000398421 | NCF1-002        | ENSG00000158517 | NCF1          | 8.39  | 2.25 |
| ENST00000429713 | SYNPO2-203      | ENSG00000172403 | SYNPO2        | 7.71  | 1.25 |
| ENST00000371930 | ANKRD22-001     | ENSG00000152766 | ANKRD22       | 7.21  | 1.56 |
| ENST00000495658 | C15orf21-002    | ENSG00000179362 | C15orf21      | 7.77  | 1.13 |
| ENST00000310865 | NEURL3-002      | ENSG00000163121 | NEURL3        | 8.88  | 1.43 |
| ENST00000359595 | HAPLN3-001      | ENSG00000140511 | HAPLN3        | 7.75  | 1.78 |
| ENST00000256722 | CMPK2-002       | ENSG00000134326 | CMPK2         | 9.30  | 2.35 |
| ENST00000380216 | IFNA16-001      | ENSG00000147885 | IFNA16        | 6.93  | 1.18 |
| ENST00000263265 | PLEKHA4-201     | ENSG00000105559 | PLEKHA4       | 8.73  | 2.74 |
| ENST00000263642 | IFIH1-001       | ENSG00000115267 | IFIH1         | 6.28  | 0.57 |
| ENST00000370459 | GBP5-001        | ENSG00000154451 | GBP5          | 7.21  | 1.53 |
| ENST00000479540 | RP4-697K14-005  | ENSG00000130589 | RP4-697K14.2  | 5.87  | 0.62 |
| ENST00000332029 | SOCS1-001       | ENSG00000185338 | SOCS1         | 6.14  | 0.68 |
| ENST00000413767 | IFNA17-001      | ENSG00000234829 | IFNA17        | 6.80  | 1.09 |
| ENST00000495089 | NFKBIZ-009      | ENSG00000144802 | NFKBIZ        | 6.53  | 1.00 |
| ENST00000437196 | EXT1-004        | ENSG00000182197 | EXT1          | 7.80  | 2.03 |
| ENST00000398657 | NKAIN1-202      | ENSG00000084628 | NKAIN1        | 7.86  | 1.29 |
| ENST00000370747 | IFI44-001       | ENSG00000137965 | IFI44         | 7.25  | 1.99 |
| ENST00000479395 | EIF2C3-006      | ENSG00000126070 | EIF2C3        | 6.32  | 0.96 |
| ENST00000447787 | AC009123-201    | ENSG00000234532 | AC009123.1    | 7.84  | 1.55 |
| ENST00000458710 | IFNA22P-201     | ENSG00000224416 | IFNA22P       | 7.66  | 1.43 |
| ENST00000378553 | LRRC50-001      | ENSG00000154099 | LRRC50        | 7.88  | 2.04 |
| ENST00000395206 | C20orf195-201   | ENSG00000125531 | C20orf195     | 7.23  | 1.61 |
| ENST00000360954 | HS3ST3B1-001    | ENSG00000125430 | HS3ST3B1      | 7.10  | 1.68 |
| ENST00000396225 | STAP1-002       | ENSG00000035720 | STAP1         | 6.82  | 1.23 |
| ENST00000254299 | GCH1-001        | ENSG00000131979 | GCH1          | 7.49  | 2.25 |
| ENST00000200307 | CCL7-201        | ENSG00000108688 | CCL7          | 7.70  | 2.25 |
| ENST00000380212 | IFNA5-001       | ENSG00000147873 | IFNA5         | 7.98  | 1.58 |
| ENST00000431790 | XAF1-204        | ENSG00000132530 | XAF1          | 5.69  | 0.64 |
| ENST00000392619 | CD300E-001      | ENSG00000186407 | CD300E        | 7.05  | 1.40 |
| ENST00000378204 | EXT1-001        | ENSG00000182197 | EXT1          | 6.20  | 0.91 |
| ENST00000482953 | MX2-002         | ENSG00000183486 | MX2           | 5.90  | 0.53 |
| ENST00000311925 | CCL19-001       | ENSG00000172724 | CCL19         | 7.66  | 1.45 |
| ENST00000450152 | RP11-464C19-002 | ENSG00000226005 | RP11-464C19.1 | 7.12  | 1.36 |
| ENST00000441170 | AC092661-002    | ENSG00000213492 | AC092661.2    | 5.82  | 0.60 |
| ENST00000242210 | NT5C3-001       | ENSG00000122643 | NT5C3         | 6.49  | 2.57 |
| ENST00000296795 | TLR3-201        | ENSG00000164342 | TLR3          | 5.99  | 1.06 |
| ENST00000155926 | TRIB2-001       | ENSG00000071575 | TRIB2         | 6.19  | 1.21 |
| ENST00000370473 | GBP1-001        | ENSG00000117228 | GBP1          | 6.05  | 0.82 |
| ENST00000367468 | PTGS2-001       | ENSG00000073756 | PTGS2         | 6.61  | 1.63 |
| ENST00000225831 | CCL2-001        | ENSG00000108691 | CCL2          | 6.39  | 0.90 |
| ENST00000449065 | AC023590-001    | ENSG00000225885 | AC023590.1    | 6.90  | 1.31 |
| ENST00000491738 | CMPK2-007       | ENSG00000134326 | CMPK2         | 8.36  | 2.02 |
| ENST00000483300 | PLSCR1-018      | ENSG00000188313 | PLSCR1        | 7.10  | 2.55 |
| ENST00000397289 | APOL3-006       | ENSG00000128284 | APOL3         | 10.03 | 3.21 |
| ENST00000421715 | IFNA4-001       | ENSG00000236637 | IFNA4         | 6.18  | 0.99 |
| ENST00000436469 | AC022816-001    | ENSG00000230647 | AC022816.1    | 7.10  | 1.61 |
| ENST00000252889 | RP4-697K14-201  | ENSG00000130589 | RP4-697K14.2  | 6.67  | 2.36 |
| ENST00000458235 | JAK3-204        | ENSG00000105639 | JAK3          | 5.63  | 0.65 |
| ENST00000301887 | BATF2-201       | ENSG00000168062 | BATF2         | 5.82  | 1.92 |
| ENST00000313624 | EPSTI1-001      | ENSG00000133106 | EPSTI1        | 6.50  | 0.89 |
| ENST00000307407 | IL8-001         | ENSG00000169429 | IL8           | 7.50  | 1.78 |
| ENST00000379958 | SAMD9-001       | ENSG00000205413 | SAMD9         | 5.28  | 0.61 |
| ENST00000436551 | AC104654-002    | ENSG00000234362 | AC104654.2    | 5.54  | 0.66 |

|                 |                 |                  |              |      |      |
|-----------------|-----------------|------------------|--------------|------|------|
| ENST00000296604 | RANBP3L-001     | ENSG00000164188  | RANBP3L      | 7.24 | 1.57 |
| ENST00000399808 | IFITM3-202      | ENSG00000142089  | IFITM3       | 5.63 | 0.87 |
| ENST00000435842 | BATF2-202       | ENSG00000168062  | BATF2        | 7.26 | 2.47 |
| ENST00000452428 | IFITM3-203      | ENSG00000142089  | IFITM3       | 5.64 | 0.68 |
| ENST00000318238 | SAMD9L-001      | ENSG00000177409  | SAMD9L       | 4.84 | 0.33 |
| ENST00000381577 | CD274-001       | ENSG00000120217  | CD274        | 5.02 | 0.57 |
| ENST00000228928 | OAS3-201        | ENSG00000111331  | OAS3         | 5.31 | 0.51 |
| ENST00000284027 | MCOLN2-001      | ENSG00000153898  | MCOLN2       | 6.91 | 2.39 |
| ENST00000463146 | AC025580-201    | ENSG00000240564  | AC025580.6   | 5.44 | 0.61 |
| ENST00000500660 | AL024507-201    | ENSG00000246971  | AL024507.3   | 7.55 | 1.45 |
| ENST00000261867 | SLC30A4-001     | ENSG00000104154  | SLC30A4      | 5.96 | 0.78 |
| ENST00000473070 | FAM65B-003      | ENSG00000111913  | FAM65B       | 6.81 | 1.14 |
| ENST00000474368 | MX2-004         | ENSG00000183486  | MX2          | 5.54 | 0.74 |
| ENST00000448696 | IFNE-001        | ENSG00000184995  | IFNE         | 5.73 | 0.91 |
| ENST00000382210 | IL32-203        | ENSG00000008517  | IL32         | 5.87 | 1.01 |
| ENST00000426204 | RP11-202G18-001 | ENSG00000227531  | RP11-202G18. | 6.05 | 1.05 |
| ENST00000470735 | NEXN-006        | ENSG00000162614  | NEXN         | 7.29 | 1.38 |
| ENST00000462359 | SLC38A5-006     | ENSG000000017483 | SLC38A5      | 5.55 | 1.07 |
| ENST00000281282 | CGNL1-001       | ENSG00000128849  | CGNL1        | 6.50 | 1.05 |
| ENST00000357461 | TMEM229B-201    | ENSG00000198133  | TMEM229B     | 5.44 | 0.51 |
| ENST00000404898 | CACNA1I-002     | ENSG00000100346  | CACNA1I      | 6.27 | 1.18 |
| ENST00000475369 | C1orf224-002    | ENSG00000237276  | C1orf224     | 5.73 | 0.83 |
| ENST00000244869 | EREG-001        | ENSG00000124882  | EREG         | 6.35 | 1.45 |
| ENST00000300119 | MYO1A-001       | ENSG00000166866  | MYO1A        | 6.02 | 1.01 |
| ENST00000442657 | HOXB9-201       | ENSG00000170689  | HOXB9        | 5.39 | 0.74 |
| ENST00000259008 | BRIP1-201       | ENSG00000136492  | BRIP1        | 6.37 | 1.72 |
| ENST00000482622 | AKT1S1-007      | ENSG00000204673  | AKT1S1       | 8.26 | 2.46 |
| ENST00000441631 | XAF1-206        | ENSG00000132530  | XAF1         | 8.72 | 3.35 |
| ENST00000473921 | HESX1-002       | ENSG00000163666  | HESX1        | 6.46 | 1.11 |
| ENST00000265598 | LAMP3-001       | ENSG00000078081  | LAMP3        | 6.93 | 1.77 |
| ENST00000329654 | PDE4B-001       | ENSG00000184588  | PDE4B        | 7.06 | 2.01 |
| ENST00000466596 | HS3ST3B1-002    | ENSG00000125430  | HS3ST3B1     | 6.04 | 1.18 |
| ENST00000409454 | C15orf21-001    | ENSG00000179362  | C15orf21     | 5.25 | 0.65 |
| ENST00000394495 | CCL4-202        | ENSG00000129277  | CCL4         | 8.35 | 2.42 |
| ENST00000499665 | AL137186-201    | ENSG00000244816  | AL137186.1   | 6.00 | 1.12 |
| ENST00000380210 | IFNA6-001       | ENSG00000120235  | IFNA6        | 5.22 | 0.91 |
| ENST00000263247 | APOBEC3G-201    | ENSG00000239713  | APOBEC3G     | 4.62 | 0.39 |
| ENST00000339270 | CCL4L2-002      | ENSG00000197262  | CCL4L2       | 8.21 | 2.04 |
| ENST00000391826 | IL4I1-203       | ENSG00000104951  | IL4I1        | 4.79 | 0.43 |
| ENST00000356897 | IL27-001        | ENSG00000197272  | IL27         | 5.87 | 1.03 |
| ENST00000375887 | TNFSF13B-001    | ENSG00000102524  | TNFSF13B     | 4.97 | 0.52 |
| ENST00000442064 | RP4-725G10-001  | ENSG00000230191  | RP4-725G10.4 | 5.86 | 0.93 |
| ENST00000371045 | PDE4B-007       | ENSG00000184588  | PDE4B        | 6.48 | 1.88 |
| ENST00000290575 | C1R-201         | ENSG00000159403  | C1R          | 6.27 | 0.92 |
| ENST00000474669 | PARP14-003      | ENSG00000173193  | PARP14       | 9.23 | 4.10 |
| ENST00000481869 | HES4-003        | ENSG00000188290  | HES4         | 7.16 | 2.41 |
| ENST00000394809 | MYLK3-001       | ENSG00000140795  | MYLK3        | 5.56 | 1.26 |
| ENST00000327442 | KPNA7-001       | ENSG00000185467  | KPNA7        | 6.07 | 1.32 |
| ENST00000413928 | AC015849-001    | ENSG00000237805  | AC015849.1   | 6.32 | 1.40 |
| ENST00000228434 | CD69-201        | ENSG00000110848  | CD69         | 5.57 | 0.82 |
| ENST00000478182 | CD80-002        | ENSG00000121594  | CD80         | 4.73 | 0.51 |
| ENST00000471652 | ZC3HAV1-003     | ENSG00000105939  | ZC3HAV1      | 9.90 | 2.72 |
| ENST00000423083 | NCF1B-003       | ENSG00000182487  | NCF1B        | 5.66 | 1.15 |
| ENST00000357585 | SSTR2-202       | ENSG00000180616  | SSTR2        | 5.62 | 1.21 |
| ENST00000263341 | IL1B-001        | ENSG00000125538  | IL1B         | 7.09 | 2.18 |
| ENST00000453713 | AC023157-201    | ENSG00000223722  | AC023157.1   | 5.53 | 0.98 |
| ENST00000393255 | AC025280-201    | ENSG00000213275  | AC025280.1   | 5.33 | 0.83 |

|                 |                |                 |              |       |      |
|-----------------|----------------|-----------------|--------------|-------|------|
| ENST00000222573 | ITGB8-001      | ENSG00000105855 | ITGB8        | 5.47  | 0.94 |
| ENST00000259030 | RTP4-001       | ENSG00000136514 | RTP4         | 4.28  | 0.29 |
| ENST00000253680 | HSH2D-201      | ENSG00000196684 | HSH2D        | 7.60  | 2.23 |
| ENST00000370292 | CSAG2-001      | ENSG00000184324 | CSAG2        | 4.93  | 0.70 |
| ENST00000263816 | LRP2-001       | ENSG00000081479 | LRP2         | 5.79  | 1.37 |
| ENST00000315994 | SH3PXD2A-002   | ENSG00000107957 | SH3PXD2A     | 9.05  | 1.89 |
| ENST00000295136 | AC092653-201   | ENSG00000244120 | AC092653.1   | 5.65  | 0.85 |
| ENST00000425368 | CFB-001        | ENSG00000243649 | CFB          | 10.06 | 2.30 |
| ENST00000435171 | IL15RA-009     | ENSG00000134470 | IL15RA       | 5.74  | 1.80 |
| ENST00000396331 | LILRB1-002     | ENSG00000104972 | LILRB1       | 4.78  | 0.65 |
| ENST00000460845 | ZC3HAV1-004    | ENSG00000105939 | ZC3HAV1      | 4.92  | 2.14 |
| ENST00000295908 | PPM1K-001      | ENSG00000163644 | PPM1K        | 4.58  | 0.34 |
| ENST00000370608 | MCOLN2-201     | ENSG00000153898 | MCOLN2       | 6.37  | 2.37 |
| ENST00000448787 | PLSCR1-003     | ENSG00000188313 | PLSCR1       | 8.07  | 3.39 |
| ENST00000433668 | SERPING1-203   | ENSG00000149131 | SERPING1     | 4.71  | 0.62 |
| ENST00000216099 | APOBEC3D-001   | ENSG00000243811 | APOBEC3D     | 7.74  | 2.90 |
| ENST00000379775 | PFKFB3-002     | ENSG00000170525 | PFKFB3       | 4.70  | 0.81 |
| ENST00000449264 | TNF-001        | ENSG00000232810 | TNF          | 5.91  | 0.87 |
| ENST00000456021 | ASPHD2-202     | ENSG00000128203 | ASPHD2       | 6.46  | 1.21 |
| ENST00000401395 | KIAA1671-202   | ENSG00000197077 | KIAA1671     | 6.24  | 1.93 |
| ENST00000316660 | PMAIP1-001     | ENSG00000141682 | PMAIP1       | 4.87  | 1.02 |
| ENST00000415810 | CSAG3-001      | ENSG00000197463 | CSAG3        | 4.57  | 0.56 |
| ENST00000427522 | RP4-697K14-001 | ENSG00000130589 | RP4-697K14.2 | 6.98  | 3.26 |
| ENST00000479435 | TNFSF13B-002   | ENSG00000102524 | TNFSF13B     | 7.99  | 2.70 |
| ENST00000477392 | RP11-511P7-001 | ENSG00000242258 | RP11-511P7.1 | 5.96  | 1.61 |
| ENST00000394472 | SAMD9L-201     | ENSG00000177409 | SAMD9L       | 5.29  | 0.99 |
| ENST00000391835 | AKT1S1-002     | ENSG00000204673 | AKT1S1       | 4.76  | 0.73 |
| ENST00000328880 | GPR109A-201    | ENSG00000182782 | GPR109A      | 5.66  | 1.38 |
| ENST00000269202 | MEP1B-201      | ENSG00000141434 | MEP1B        | 5.01  | 1.03 |
| ENST00000319921 | AC124319-201   | ENSG00000180843 | AC124319.2   | 3.97  | 0.24 |
| ENST00000407997 | APOBEC3G-001   | ENSG00000239713 | APOBEC3G     | 6.25  | 2.82 |
| ENST00000348655 | IRF7-003       | ENSG00000185507 | IRF7         | 7.87  | 3.14 |
| ENST00000353172 | KCTD14-001     | ENSG00000151364 | KCTD14       | 5.20  | 1.31 |
| ENST00000400837 | CRLF2-204      | ENSG00000205755 | CRLF2        | 5.26  | 1.05 |
| ENST00000418094 | IDO2-003       | ENSG00000188676 | IDO2         | 5.74  | 0.91 |
| ENST00000378023 | FAM65B-002     | ENSG00000111913 | FAM65B       | 6.57  | 1.29 |
| ENST00000443559 | IFITM2-203     | ENSG00000185201 | IFITM2       | 4.86  | 0.90 |
| ENST00000489444 | GBP3-002       | ENSG00000117226 | GBP3         | 6.31  | 2.91 |
| ENST00000392048 | SP110-004      | ENSG00000135899 | SP110        | 3.88  | 0.24 |
| ENST00000380698 | SERPINB9-001   | ENSG00000170542 | SERPINB9     | 4.35  | 0.60 |
| ENST00000495622 | ITIH3-010      | ENSG00000162267 | ITIH3        | 4.25  | 0.51 |
| ENST00000329464 | TRIM69-201     | ENSG00000185880 | TRIM69       | 5.94  | 1.27 |
| ENST00000354258 | TAP1-001       | ENSG00000168394 | TAP1         | 4.35  | 0.43 |
| ENST00000469048 | IRF7-004       | ENSG00000185507 | IRF7         | 5.18  | 0.98 |
| ENST00000478442 | RABGAP1L-010   | ENSG00000152061 | RABGAP1L     | 5.96  | 2.68 |
| ENST00000269518 | PMAIP1-002     | ENSG00000141682 | PMAIP1       | 5.68  | 1.79 |
| ENST00000441828 | RUFY4-202      | ENSG00000188282 | RUFY4        | 5.90  | 1.69 |
| ENST00000468219 | CLEC19A-204    | ENSG00000188477 | CLEC19A      | 4.10  | 0.61 |
| ENST00000361099 | STAT1-001      | ENSG00000115415 | STAT1        | 4.85  | 0.85 |
| ENST00000461384 | GBP3-007       | ENSG00000117226 | GBP3         | 5.38  | 1.85 |
| ENST00000466205 | CD40-006       | ENSG00000101017 | CD40         | 5.85  | 3.04 |
| ENST00000470496 | PLSCR1-020     | ENSG00000188313 | PLSCR1       | 6.46  | 2.63 |
| ENST00000361112 | SLFN12L-201    | ENSG00000205045 | SLFN12L      | 5.10  | 1.16 |
| ENST00000480395 | TRIM22-002     | ENSG00000132274 | TRIM22       | 4.57  | 0.61 |
| ENST00000371795 | IFIT5-001      | ENSG00000152778 | IFIT5        | 3.98  | 0.32 |
| ENST00000378354 | CCL3L1-201     | ENSG00000205021 | CCL3L1       | 6.90  | 2.34 |
| ENST00000251642 | DHX58-001      | ENSG00000108771 | DHX58        | 3.89  | 0.21 |

|                 |                    |                 |              |      |      |
|-----------------|--------------------|-----------------|--------------|------|------|
| ENST00000493432 | PLSCR1-005         | ENSG00000188313 | PLSCR1       | 5.04 | 0.81 |
| ENST00000342887 | C12orf63-201       | ENSG00000188596 | C12orf63     | 5.13 | 0.96 |
| ENST00000343295 | IDO2-001           | ENSG00000188676 | IDO2         | 6.28 | 1.53 |
| ENST00000246549 | FFAR2-201          | ENSG00000126262 | FFAR2        | 4.68 | 1.02 |
| ENST00000370005 | ELOVL3-001         | ENSG00000119915 | ELOVL3       | 5.39 | 0.99 |
| ENST00000401630 | IL6-005            | ENSG00000136244 | IL6          | 7.08 | 1.76 |
| ENST00000222249 | KCNN1-201          | ENSG00000105642 | KCNN1        | 5.85 | 1.69 |
| ENST00000366578 | ACTN2-001          | ENSG00000077522 | ACTN2        | 5.18 | 1.12 |
| ENST00000392045 | SP140-002          | ENSG00000079263 | SP140        | 8.90 | 3.15 |
| ENST00000400497 | RP11-37E23-001     | ENSG00000215515 | RP11-37E23.2 | 5.82 | 1.50 |
| ENST00000413475 | TMPRSS13-203       | ENSG00000137747 | TMPRSS13     | 7.34 | 2.07 |
| ENST00000435131 | IGF2BP3-202        | ENSG00000136231 | IGF2BP3      | 6.21 | 1.84 |
| ENST00000457912 | SMTNL1-202         | ENSG00000214872 | SMTNL1       | 4.59 | 1.69 |
| ENST00000379965 | TRIM22-001         | ENSG00000132274 | TRIM22       | 5.92 | 3.61 |
| ENST00000477068 | SP110-005          | ENSG00000135899 | SP110        | 3.83 | 0.32 |
| ENST00000270458 | CACNG8-001         | ENSG00000142408 | CACNG8       | 5.55 | 1.61 |
| ENST00000494664 | C3orf1-001         | ENSG00000113845 | C3orf1       | 8.79 | 2.68 |
| ENST00000395135 | PML-202            | ENSG00000140464 | PML          | 3.97 | 0.80 |
| ENST00000306384 | VAMP5-001          | ENSG00000168899 | VAMP5        | 4.72 | 1.20 |
| ENST00000429934 | RP11-383F6-001     | ENSG00000229677 | RP11-383F6.1 | 5.01 | 1.75 |
| ENST00000343780 | SEMA4D-001         | ENSG00000187764 | SEMA4D       | 6.11 | 3.04 |
| ENST00000484704 | HLA-F-012          | ENSG00000204642 | HLA-F        | 6.26 | 3.38 |
| ENST00000360534 | DPP4-001           | ENSG00000197635 | DPP4         | 6.28 | 2.51 |
| ENST00000394506 | CCL15-002          | ENSG00000161574 | CCL15        | 5.70 | 1.33 |
| ENST00000376896 | RORB-001           | ENSG00000198963 | RORB         | 4.70 | 0.79 |
| ENST00000366457 | AC023590-002       | ENSG00000225885 | AC023590.1   | 6.06 | 1.30 |
| ENST00000261937 | FLT4-001           | ENSG00000037280 | FLT4         | 4.70 | 0.95 |
| ENST00000341855 | RP11-760D2-001     | ENSG00000213067 | RP11-760D2.8 | 4.39 | 0.87 |
| ENST00000477265 | IL15-003           | ENSG00000164136 | IL15         | 5.27 | 1.96 |
| ENST00000441380 | IFITM4P-001        | ENSG00000235821 | IFITM4P      | 4.86 | 0.94 |
| ENST00000443143 | AC116049-201       | ENSG00000236562 | AC116049.2   | 4.15 | 0.63 |
| ENST00000393743 | DDX60-202          | ENSG00000137628 | DDX60        | 4.75 | 0.97 |
| ENST00000422704 | SEMA4D-005         | ENSG00000187764 | SEMA4D       | 4.34 | 0.80 |
| ENST00000435786 | PML-205            | ENSG00000140464 | PML          | 3.80 | 0.29 |
| ENST00000367061 | TAGAP-201          | ENSG00000164691 | TAGAP        | 4.40 | 0.90 |
| ENST00000310706 | JUP-001            | ENSG00000173801 | JUP          | 6.06 | 2.77 |
| ENST00000414795 | AC017076-002       | ENSG00000225964 | AC017076.4   | 4.98 | 1.17 |
| ENST00000483358 | NUB1-008           | ENSG00000013374 | NUB1         | 5.60 | 2.77 |
| ENST00000299663 | CLEC4E-201         | ENSG00000166523 | CLEC4E       | 4.26 | 0.85 |
| ENST00000308521 | APOBEC3F-001       | ENSG00000128394 | APOBEC3F     | 4.21 | 0.40 |
| ENST00000413202 | AC133644-004       | ENSG00000222041 | AC133644.3   | 7.50 | 2.26 |
| ENST00000415816 | IFI35-202          | ENSG00000068079 | IFI35        | 4.17 | 0.58 |
| ENST00000223642 | C5-001             | ENSG00000106804 | C5           | 4.15 | 0.74 |
| ENST00000395641 | NUPR1-201          | ENSG00000176046 | NUPR1        | 8.45 | 4.11 |
| ENST00000399600 | C17orf87-001       | ENSG00000161929 | C17orf87     | 4.06 | 0.66 |
| ENST00000359092 | AXL-202            | ENSG00000167601 | AXL          | 5.03 | 1.27 |
| ENST00000499682 | AC106881-201       | ENSG00000247646 | AC106881.1   | 6.08 | 1.18 |
| ENST00000494150 | APOBEC3G-007       | ENSG00000239713 | APOBEC3G     | 3.88 | 0.35 |
| ENST00000491591 | DPP4-010           | ENSG00000197635 | DPP4         | 5.12 | 1.77 |
| ENST00000374045 | TNFSF15-001        | ENSG00000181634 | TNFSF15      | 6.87 | 1.85 |
| ENST00000298992 | ABTB2-201          | ENSG00000166016 | ABTB2        | 3.69 | 0.42 |
| ENST00000226299 | LAP3-001           | ENSG00000002549 | LAP3         | 3.82 | 0.49 |
| ENST00000357018 | CACNA1A-202        | ENSG00000141837 | CACNA1A      | 5.35 | 1.94 |
| ENST00000397709 | MAP1LC3A-003       | ENSG00000101460 | MAP1LC3A     | 5.52 | 1.60 |
| ENST00000415067 | XXbac-BPG246D15-00 | ENSG00000204261 | XXbac-BPG246 | 4.40 | 1.89 |
| ENST00000405885 | IRF1-008           | ENSG00000125347 | IRF1         | 3.75 | 0.39 |
| ENST00000337752 | C5orf56-001        | ENSG00000197536 | C5orf56      | 3.70 | 0.45 |

|                 |                 |                 |               |      |      |
|-----------------|-----------------|-----------------|---------------|------|------|
| ENST00000377508 | OAS1-203        | ENSG00000089127 | OAS1          | 9.52 | 4.29 |
| ENST00000301807 | LBA1-201        | ENSG00000168016 | LBA1          | 4.34 | 0.74 |
| ENST00000366140 | AC017076-001    | ENSG00000225964 | AC017076.4    | 5.67 | 1.26 |
| ENST00000450418 | AC023480-001    | ENSG00000229241 | AC023480.1    | 4.62 | 1.20 |
| ENST00000443093 | AC116366-001    | ENSG00000234290 | AC116366.1    | 4.74 | 2.31 |
| ENST00000235150 | RNF19B-002      | ENSG00000116514 | RNF19B        | 3.32 | 0.15 |
| ENST00000435224 | ABTB2-001       | ENSG00000166016 | ABTB2         | 5.68 | 1.78 |
| ENST00000467569 | RIN2-005        | ENSG00000132669 | RIN2          | 7.69 | 1.99 |
| ENST00000452357 | OAS1-205        | ENSG00000089127 | OAS1          | 3.88 | 0.49 |
| ENST00000433412 | PHF15-203       | ENSG00000043143 | PHF15         | 4.86 | 2.40 |
| ENST00000245907 | C3-001          | ENSG00000125730 | C3            | 9.90 | 3.60 |
| ENST00000370315 | C6orf150-002    | ENSG00000164430 | C6orf150      | 3.47 | 0.34 |
| ENST00000427236 | RP4-641G12-001  | ENSG00000238015 | RP4-641G12.2  | 4.66 | 0.95 |
| ENST00000304425 | RP11-354P17-001 | ENSG00000171889 | RP11-354P17.1 | 5.22 | 1.49 |
| ENST00000339867 | RP3-391O22-001  | ENSG00000196114 | RP3-391O22.1  | 4.20 | 0.88 |
| ENST00000268058 | PML-001         | ENSG00000140464 | PML           | 3.69 | 0.37 |
| ENST00000309186 | FZD4-201        | ENSG00000174804 | FZD4          | 4.75 | 0.90 |
| ENST00000303115 | IL7R-001        | ENSG00000168685 | IL7R          | 3.72 | 0.45 |
| ENST00000409112 | SP100-004       | ENSG00000067066 | SP100         | 7.48 | 2.47 |
| ENST00000239468 | TNFSF18-201     | ENSG00000120337 | TNFSF18       | 5.78 | 1.51 |
| ENST00000427581 | LILRB1-007      | ENSG00000104972 | LILRB1        | 6.30 | 2.99 |
| ENST00000412669 | AC002456-003    | ENSG00000223969 | AC002456.1    | 5.69 | 1.27 |
| ENST00000436078 | RP11-91K9-001   | ENSG00000231574 | RP11-91K9.1   | 4.79 | 0.96 |
| ENST00000456917 | MIRHG2-001      | ENSG00000234883 | MIRHG2        | 4.12 | 0.80 |
| ENST00000398738 | C6orf138-001    | ENSG00000244694 | C6orf138      | 5.22 | 1.62 |
| ENST00000299665 | CLEC4D-201      | ENSG00000166527 | CLEC4D        | 4.21 | 1.27 |
| ENST00000418263 | CCNA1-201       | ENSG00000133101 | CCNA1         | 7.38 | 3.03 |
| ENST00000460200 | PSTPIP2-004     | ENSG00000152229 | PSTPIP2       | 3.80 | 1.17 |
| ENST00000361820 | GRIN3A-001      | ENSG00000198785 | GRIN3A        | 3.43 | 0.50 |
| ENST00000456466 | AC124319-203    | ENSG00000180843 | AC124319.2    | 4.25 | 0.87 |
| ENST00000453265 | PSMB9-201       | ENSG00000240065 | PSMB9         | 3.72 | 0.71 |
| ENST00000414055 | C1orf224-201    | ENSG00000237276 | C1orf224      | 6.00 | 1.45 |
| ENST00000444639 | KIAA0040-001    | ENSG00000235750 | KIAA0040      | 4.62 | 2.68 |
| ENST00000485662 | IFI44-007       | ENSG00000137965 | IFI44         | 4.64 | 0.92 |
| ENST00000376753 | FBXO6-001       | ENSG00000116663 | FBXO6         | 3.76 | 0.54 |
| ENST00000356107 | TJP1-201        | ENSG00000104067 | TJP1          | 5.41 | 2.49 |
| ENST00000374897 | TAP2-001        | ENSG00000204267 | TAP2          | 3.43 | 0.44 |
| ENST00000446230 | PIWIL4-202      | ENSG00000134627 | PIWIL4        | 4.48 | 2.37 |
| ENST00000411702 | AC124319-202    | ENSG00000180843 | AC124319.2    | 3.57 | 0.31 |
| ENST00000343575 | CXCL12-001      | ENSG00000107562 | CXCL12        | 3.93 | 1.15 |
| ENST00000451096 | RHEBL1-203      | ENSG00000167550 | RHEBL1        | 4.18 | 1.64 |
| ENST00000371899 | SLC2A6-001      | ENSG00000160326 | SLC2A6        | 4.21 | 1.11 |
| ENST00000253110 | C19orf66-201    | ENSG00000130813 | C19orf66      | 3.23 | 0.29 |
| ENST00000499116 | AL135914-201    | ENSG00000248087 | AL135914.3    | 4.15 | 0.72 |
| ENST00000476223 | RP11-383G6-001  | ENSG00000240576 | RP11-383G6.3  | 4.49 | 1.28 |
| ENST00000056233 | NFE2L3-001      | ENSG00000050344 | NFE2L3        | 3.85 | 0.76 |
| ENST00000454686 | RP1-193M11-001  | ENSG00000213500 | RP1-193M11.1  | 4.11 | 0.80 |
| ENST00000233057 | EIF2AK2-001     | ENSG00000055332 | EIF2AK2       | 3.38 | 0.41 |
| ENST00000379375 | EDN1-001        | ENSG00000078401 | EDN1          | 6.01 | 1.99 |
| ENST00000462315 | PARP9-003       | ENSG00000138496 | PARP9         | 3.83 | 0.65 |
| ENST00000424614 | OPTN-001        | ENSG00000123240 | OPTN          | 5.59 | 2.97 |
| ENST00000374859 | PSMB9-001       | ENSG00000240065 | PSMB9         | 3.52 | 0.43 |
| ENST00000367066 | TAGAP-001       | ENSG00000164691 | TAGAP         | 3.42 | 0.40 |
| ENST00000467593 | PSMB9-004       | ENSG00000240065 | PSMB9         | 4.47 | 2.11 |
| ENST00000324873 | NUPR1-001       | ENSG00000176046 | NUPR1         | 4.39 | 0.93 |
| ENST00000478808 | USP30-004       | ENSG00000135093 | USP30         | 3.82 | 0.70 |
| ENST00000377507 | TNFRSF9-001     | ENSG00000049249 | TNFRSF9       | 4.29 | 0.87 |

|                 |                 |                 |               |      |      |
|-----------------|-----------------|-----------------|---------------|------|------|
| ENST00000420981 | RP11-420G6-001  | ENSG00000230438 | RP11-420G6.1  | 4.07 | 0.87 |
| ENST00000499886 | AC092053-201    | ENSG00000246007 | AC092053.1    | 3.81 | 0.50 |
| ENST00000378342 | CCL4L2-201      | ENSG00000197262 | CCL4L2        | 7.96 | 2.30 |
| ENST00000499648 | AC009712-201    | ENSG00000247829 | AC009712.2    | 4.07 | 0.93 |
| ENST00000433961 | TRIM5-005       | ENSG00000132256 | TRIM5         | 3.77 | 0.86 |
| ENST00000259339 | TOR1B-001       | ENSG00000136816 | TOR1B         | 3.38 | 0.33 |
| ENST00000447329 | RP4-794H19-002  | ENSG00000230812 | RP4-794H19.4  | 4.26 | 1.17 |
| ENST00000421011 | IRF1-201        | ENSG00000125347 | IRF1          | 3.53 | 0.30 |
| ENST00000422824 | AC027228-201    | ENSG00000229669 | AC027228.1    | 5.33 | 1.33 |
| ENST00000355055 | IL28B-201       | ENSG00000197110 | IL28B         | 4.98 | 1.01 |
| ENST00000369158 | HIST2H3C-001    | ENSG00000203811 | HIST2H3C      | 3.89 | 0.70 |
| ENST00000403683 | HIST2H3A-001    | ENSG00000203852 | HIST2H3A      | 3.91 | 0.72 |
| ENST00000331289 | ASCL2-001       | ENSG00000183734 | ASCL2         | 3.49 | 0.67 |
| ENST00000356865 | ATP10A-201      | ENSG00000206190 | ATP10A        | 3.85 | 0.92 |
| ENST00000454181 | LYSMD2-201      | ENSG00000140280 | LYSMD2        | 4.20 | 1.04 |
| ENST00000344300 | C15orf48-001    | ENSG00000166920 | C15orf48      | 4.34 | 0.66 |
| ENST00000355083 | TMEM110-004     | ENSG00000213533 | TMEM110       | 3.34 | 0.34 |
| ENST00000403662 | CSF2RB-001      | ENSG00000100368 | CSF2RB        | 4.61 | 3.23 |
| ENST00000461203 | C5orf56-004     | ENSG00000197536 | C5orf56       | 4.31 | 1.36 |
| ENST00000444414 | CCL4L1-208      | ENSG00000205020 | CCL4L1        | 7.07 | 1.93 |
| ENST00000438323 | IFI35-203       | ENSG00000068079 | IFI35         | 5.30 | 3.57 |
| ENST00000454398 | HLA-DPA3-001    | ENSG00000237398 | HLA-DPA3      | 5.54 | 1.44 |
| ENST00000442800 | AC006027-002    | ENSG00000244279 | AC006027.2    | 5.36 | 2.35 |
| ENST00000409930 | IL1RN-005       | ENSG00000136689 | IL1RN         | 6.36 | 4.31 |
| ENST00000372278 | CD40-201        | ENSG00000101017 | CD40          | 3.41 | 0.35 |
| ENST00000237289 | TNFAIP3-001     | ENSG00000118503 | TNFAIP3       | 3.91 | 0.69 |
| ENST00000437954 | AC124319-201    | ENSG00000237199 | AC124319.3    | 3.56 | 0.55 |
| ENST00000481958 | APOBEC3G-003    | ENSG00000239713 | APOBEC3G      | 3.59 | 0.52 |
| ENST00000492569 | RP11-292E2-001  | ENSG00000238755 | RP11-292E2.3  | 3.96 | 0.81 |
| ENST00000374429 | CXCL12-002      | ENSG00000107562 | CXCL12        | 4.48 | 1.19 |
| ENST00000421237 | RP11-439L18-001 | ENSG00000224460 | RP11-439L18.2 | 4.21 | 0.72 |
| ENST00000264246 | CD80-001        | ENSG00000121594 | CD80          | 7.79 | 2.59 |
| ENST00000396404 | CYP19A1-202     | ENSG00000137869 | CYP19A1       | 5.51 | 1.75 |
| ENST00000381799 | RHOH-001        | ENSG00000168421 | RHOH          | 4.44 | 0.94 |
| ENST00000395003 | PHF15-002       | ENSG00000043143 | PHF15         | 3.28 | 0.45 |
| ENST00000296545 | IL15-001        | ENSG00000164136 | IL15          | 5.32 | 1.57 |
| ENST00000418895 | LGALS3BP-202    | ENSG00000108679 | LGALS3BP      | 3.55 | 0.89 |
| ENST00000395761 | CXCL1-201       | ENSG00000163739 | CXCL1         | 5.03 | 1.22 |
| ENST00000499234 | AC125257-201    | ENSG00000247918 | AC125257.1    | 8.00 | 2.62 |
| ENST00000409746 | PSTPIP2-002     | ENSG00000152229 | PSTPIP2       | 5.17 | 2.74 |
| ENST00000269389 | SECTM1-201      | ENSG00000141574 | SECTM1        | 3.69 | 0.53 |
| ENST00000408936 | DAB2IP-009      | ENSG00000136848 | DAB2IP        | 5.69 | 2.11 |
| ENST00000409652 | APOL6-001       | ENSG00000221963 | APOL6         | 3.24 | 0.45 |
| ENST00000278505 | ENDOD1-201      | ENSG00000149218 | ENDOD1        | 3.30 | 0.46 |
| ENST00000470876 | PHF15-004       | ENSG00000043143 | PHF15         | 3.73 | 1.76 |
| ENST00000270443 | ZNF702P-001     | ENSG00000242779 | ZNF702P       | 7.43 | 2.53 |
| ENST00000394691 | PLEKHG3-201     | ENSG00000126822 | PLEKHG3       | 4.78 | 2.49 |
| ENST00000372886 | PKIG-004        | ENSG00000168734 | PKIG          | 5.67 | 1.41 |
| ENST00000309739 | RND1-201        | ENSG00000172602 | RND1          | 4.14 | 1.12 |
| ENST00000377712 | AC092653-001    | ENSG00000204872 | AC092653.3    | 5.17 | 1.40 |
| ENST00000368599 | FAM26E-001      | ENSG00000178033 | FAM26E        | 5.83 | 1.39 |
| ENST00000393739 | DDX60-201       | ENSG00000137628 | DDX60         | 4.00 | 0.63 |
| ENST00000380874 | FOXC1-001       | ENSG00000054598 | FOXC1         | 4.23 | 1.20 |
| ENST00000367055 | SOD2-002        | ENSG00000112096 | SOD2          | 3.93 | 0.80 |
| ENST00000502006 | AC008063-201    | ENSG00000246092 | AC008063.2    | 3.66 | 0.66 |
| ENST00000258381 | SP110-002       | ENSG00000135899 | SP110         | 6.11 | 3.49 |
| ENST00000382723 | MSX1-001        | ENSG00000163132 | MSX1          | 5.39 | 1.56 |



|                 |                 |                 |               |      |      |
|-----------------|-----------------|-----------------|---------------|------|------|
| ENST00000462451 | VAMP5-002       | ENSG00000168899 | VAMP5         | 4.60 | 2.20 |
| ENST00000431240 | NOD2-201        | ENSG00000167207 | NOD2          | 4.23 | 1.41 |
| ENST00000296161 | DTX3L-001       | ENSG00000163840 | DTX3L         | 2.87 | 0.27 |
| ENST00000273153 | CSRNP1-001      | ENSG00000144655 | CSRNP1        | 4.19 | 0.72 |
| ENST00000486332 | TAP1-002        | ENSG00000168394 | TAP1          | 4.52 | 2.30 |
| ENST00000501134 | AC025574-201    | ENSG00000247899 | AC025574.1    | 3.50 | 0.89 |
| ENST00000481066 | PNPT1-005       | ENSG00000138035 | PNPT1         | 4.27 | 0.87 |
| ENST00000427842 | TNFSF15-201     | ENSG00000181634 | TNFSF15       | 5.09 | 1.59 |
| ENST00000432272 | RP13-297E16-002 | ENSG00000223511 | RP13-297E16.1 | 4.24 | 1.06 |
| ENST00000393931 | JUP-008         | ENSG00000173801 | JUP           | 4.78 | 1.14 |
| ENST00000401899 | RNF19B-202      | ENSG00000116514 | RNF19B        | 5.19 | 3.30 |
| ENST00000409330 | NBN-003         | ENSG00000104320 | NBN           | 4.73 | 3.11 |
| ENST00000243346 | NMI-001         | ENSG00000123609 | NMI           | 3.17 | 0.37 |
| ENST00000500725 | AL512428-201    | ENSG00000245474 | AL512428.1    | 4.37 | 0.89 |
| ENST00000285013 | SLFN13-201      | ENSG00000154760 | SLFN13        | 5.21 | 1.93 |
| ENST00000447143 | STAT4-201       | ENSG00000138378 | STAT4         | 6.22 | 3.21 |
| ENST00000492382 | PARP9-004       | ENSG00000138496 | PARP9         | 4.52 | 1.69 |
| ENST00000200652 | SLC22A4-001     | ENSG00000197208 | SLC22A4       | 3.38 | 0.71 |
| ENST00000325719 | OR52K2-201      | ENSG00000181963 | OR52K2        | 4.11 | 0.81 |
| ENST00000425894 | AC027119-001    | ENSG00000229642 | AC027119.1    | 4.11 | 0.97 |
| ENST00000497857 | RUFY4-004       | ENSG00000188282 | RUFY4         | 4.04 | 0.91 |
| ENST00000448809 | C9orf91-201     | ENSG00000157693 | C9orf91       | 3.04 | 0.44 |
| ENST00000395113 | UBE2L6-203      | ENSG00000156587 | UBE2L6        | 2.87 | 0.18 |
| ENST00000371697 | ANKRD1-001      | ENSG00000148677 | ANKRD1        | 6.13 | 1.86 |
| ENST00000423390 | BX255923-001    | ENSG00000240907 | BX255923.2    | 6.02 | 1.73 |
| ENST00000337530 | KIAA1958-001    | ENSG00000165185 | KIAA1958      | 3.26 | 0.58 |
| ENST00000300797 | PRRT2-201       | ENSG00000167371 | PRRT2         | 3.94 | 1.04 |
| ENST00000370466 | GBP2-002        | ENSG00000162645 | GBP2          | 4.23 | 2.83 |
| ENST00000415826 | PLA2G16-203     | ENSG00000176485 | PLA2G16       | 6.15 | 2.40 |
| ENST00000355014 | SEMA4A-002      | ENSG00000196189 | SEMA4A        | 3.55 | 0.76 |
| ENST00000245457 | PTGER2-001      | ENSG00000125384 | PTGER2        | 3.55 | 0.54 |
| ENST00000306139 | ATF5-201        | ENSG00000169136 | ATF5          | 3.72 | 0.81 |
| ENST00000420301 | CYP19A1-203     | ENSG00000137869 | CYP19A1       | 4.48 | 1.35 |
| ENST00000428917 | TAP2-201        | ENSG00000204267 | TAP2          | 3.10 | 0.57 |
| ENST00000379882 | DDX58-201       | ENSG00000107201 | DDX58         | 5.44 | 1.28 |
| ENST00000361171 | FAM125B-001     | ENSG00000196814 | FAM125B       | 3.10 | 0.36 |
| ENST00000477775 | ATXN7L1-008     | ENSG00000146776 | ATXN7L1       | 5.66 | 2.03 |
| ENST00000369583 | DUSP-001        | ENSG00000138166 | DUSP          | 3.19 | 0.49 |
| ENST00000373645 | SP140-003       | ENSG00000079263 | SP140         | 4.02 | 0.88 |
| ENST00000468472 | MUSTN1-004      | ENSG00000243696 | MUSTN1        | 3.34 | 0.37 |
| ENST00000361157 | IFI6-001        | ENSG00000126709 | IFI6          | 3.40 | 0.56 |
| ENST00000260282 | FXYP6-201       | ENSG00000137726 | FXYP6         | 3.15 | 0.46 |
| ENST00000294997 | CR1L-001        | ENSG00000197721 | CR1L          | 5.30 | 1.42 |
| ENST00000243440 | BATF3-001       | ENSG00000123685 | BATF3         | 3.85 | 1.31 |
| ENST00000396650 | C15orf48-201    | ENSG00000166920 | C15orf48      | 3.84 | 0.63 |
| ENST00000394627 | CCL7-003        | ENSG00000108688 | CCL7          | 6.16 | 2.28 |
| ENST00000236147 | SELL-001        | ENSG00000188404 | SELL          | 3.45 | 0.56 |
| ENST00000302326 | MN1-001         | ENSG00000169184 | MN1           | 3.78 | 0.96 |
| ENST00000263464 | BIRC3-201       | ENSG00000023445 | BIRC3         | 3.30 | 0.54 |
| ENST00000399817 | IFITM2-202      | ENSG00000185201 | IFITM2        | 3.07 | 0.50 |
| ENST00000392981 | XRN1-004        | ENSG00000114127 | XRN1          | 3.19 | 0.57 |
| ENST00000267015 | GPR84-201       | ENSG00000139572 | GPR84         | 2.91 | 0.33 |
| ENST00000395148 | CFLAR-005       | ENSG00000003402 | CFLAR         | 2.93 | 0.31 |
| ENST00000371752 | ZNFX1-001       | ENSG00000124201 | ZNFX1         | 2.97 | 0.40 |
| ENST00000458061 | C1R-202         | ENSG00000159403 | C1R           | 5.40 | 1.57 |
| ENST00000314553 | EXOC3L-201      | ENSG00000179044 | EXOC3L        | 4.27 | 1.52 |
| ENST00000441767 | PRICKLE1-202    | ENSG00000139174 | PRICKLE1      | 5.10 | 1.34 |

|                 |                 |                 |               |      |      |
|-----------------|-----------------|-----------------|---------------|------|------|
| ENST00000262776 | LGALS3BP-201    | ENSG00000108679 | LGALS3BP      | 3.27 | 0.65 |
| ENST00000314128 | STAT2-201       | ENSG00000170581 | STAT2         | 3.27 | 0.54 |
| ENST00000498904 | AL160008-201    | ENSG00000247275 | AL160008.2    | 4.61 | 1.48 |
| ENST00000490682 | CASP8-008       | ENSG00000064012 | CASP8         | 3.19 | 0.52 |
| ENST00000266542 | C1RL-201        | ENSG00000139178 | C1RL          | 4.25 | 1.62 |
| ENST00000437695 | RP5-1141O19-001 | ENSG00000227085 | RP5-1141O19.  | 3.69 | 0.66 |
| ENST00000221847 | EBI3-201        | ENSG00000105246 | EBI3          | 4.87 | 1.39 |
| ENST00000438195 | RP4-794H19-001  | ENSG00000230812 | RP4-794H19.4  | 4.50 | 1.39 |
| ENST00000367128 | FAM72A-001      | ENSG00000196550 | FAM72A        | 3.78 | 2.00 |
| ENST00000495552 | MUSTN1-003      | ENSG00000243696 | MUSTN1        | 3.05 | 0.50 |
| ENST00000456298 | FAM177B-005     | ENSG00000197520 | FAM177B       | 3.67 | 0.66 |
| ENST00000264492 | CXCL2-201       | ENSG00000081041 | CXCL2         | 3.63 | 1.01 |
| ENST00000259939 | RNF144B-001     | ENSG00000137393 | RNF144B       | 3.02 | 0.50 |
| ENST00000489597 | SP110-012       | ENSG00000135899 | SP110         | 4.88 | 2.77 |
| ENST00000342771 | AUTS2-001       | ENSG00000158321 | AUTS2         | 4.34 | 1.91 |
| ENST00000383320 | HCP5-201        | ENSG00000206337 | HCP5          | 4.41 | 1.73 |
| ENST00000355295 | TDRD7-001       | ENSG00000196116 | TDRD7         | 3.95 | 1.89 |
| ENST00000252785 | SCO2-002        | ENSG00000130489 | SCO2          | 6.61 | 4.24 |
| ENST00000383660 | PARP15-201      | ENSG00000173200 | PARP15        | 5.48 | 2.49 |
| ENST00000486194 | HLA-F-010       | ENSG00000204642 | HLA-F         | 6.65 | 3.60 |
| ENST00000456775 | ST7OT1-001      | ENSG00000227199 | ST7OT1        | 3.63 | 1.16 |
| ENST00000245414 | IRF1-001        | ENSG00000125347 | IRF1          | 3.48 | 0.72 |
| ENST00000336301 | RNF213-201      | ENSG00000173821 | RNF213        | 4.44 | 1.13 |
| ENST00000417218 | AL592494-001    | ENSG00000227082 | AL592494.3    | 3.48 | 0.92 |
| ENST00000392068 | SGPP2-201       | ENSG00000163082 | SGPP2         | 4.35 | 1.77 |
| ENST00000412615 | TRAFD1-202      | ENSG00000135148 | TRAFD1        | 2.60 | 0.24 |
| ENST00000485978 | SLC2A6-003      | ENSG00000160326 | SLC2A6        | 4.59 | 2.22 |
| ENST00000278175 | ADM-201         | ENSG00000148926 | ADM           | 3.01 | 0.38 |
| ENST00000434136 | AC124319-201    | ENSG00000234591 | AC124319.1    | 3.21 | 0.50 |
| ENST00000482294 | CBX7-002        | ENSG00000100307 | CBX7          | 2.89 | 0.41 |
| ENST00000273582 | KIAA0226-001    | ENSG00000145016 | KIAA0226      | 2.87 | 0.38 |
| ENST00000470178 | CFLAR-022       | ENSG00000003402 | CFLAR         | 4.89 | 3.00 |
| ENST00000260126 | SLCO5A1-201     | ENSG00000137571 | SLCO5A1       | 4.74 | 1.39 |
| ENST00000366134 | RP13-314C10-001 | ENSG00000233785 | RP13-314C10.1 | 4.58 | 1.56 |
| ENST00000428912 | RP5-908D6-001   | ENSG00000233235 | RP5-908D6.1   | 3.31 | 0.72 |
| ENST00000418839 | RP11-408H1-003  | ENSG00000223387 | RP11-408H1.2  | 4.59 | 1.32 |
| ENST00000467626 | CRLF2-002       | ENSG00000205755 | CRLF2         | 3.80 | 1.12 |
| ENST00000354922 | PNRC1-002       | ENSG00000146278 | PNRC1         | 6.09 | 2.67 |
| ENST00000245903 | CD70-201        | ENSG00000125726 | CD70          | 5.06 | 1.55 |
| ENST00000373177 | HDX-001         | ENSG00000165259 | HDX           | 4.06 | 1.04 |
| ENST00000282045 | PSTPIP2-201     | ENSG00000152229 | PSTPIP2       | 7.43 | 3.38 |
| ENST00000366489 | C1orf150-002    | ENSG00000169224 | C1orf150      | 4.50 | 1.19 |
| ENST00000336032 | PNRC1-001       | ENSG00000146278 | PNRC1         | 3.00 | 0.51 |
| ENST00000373451 | FTSJD2-001      | ENSG00000137200 | FTSJD2        | 2.74 | 0.34 |
| ENST00000323646 | PLA2G16-201     | ENSG00000176485 | PLA2G16       | 5.40 | 2.21 |
| ENST00000358752 | FUT4-201        | ENSG00000196371 | FUT4          | 3.00 | 0.44 |
| ENST00000369155 | HIST2H2BE-001   | ENSG00000184678 | HIST2H2BE     | 2.88 | 0.54 |
| ENST00000429054 | RNF144B-202     | ENSG00000137393 | RNF144B       | 2.80 | 0.37 |
| ENST00000340023 | FPR2-201        | ENSG00000171049 | FPR2          | 3.89 | 1.08 |
| ENST00000423313 | KIAA0040-002    | ENSG00000235750 | KIAA0040      | 8.54 | 3.02 |
| ENST00000442824 | AC116347-201    | ENSG00000238000 | AC116347.1    | 2.93 | 0.43 |
| ENST00000375940 | MASTL-004       | ENSG00000120539 | MASTL         | 7.78 | 3.34 |
| ENST00000371897 | SLC2A6-002      | ENSG00000160326 | SLC2A6        | 4.40 | 2.87 |
| ENST00000215886 | LGALS2-001      | ENSG00000100079 | LGALS2        | 4.61 | 1.55 |
| ENST00000381652 | JAK2-001        | ENSG00000096968 | JAK2          | 3.48 | 0.92 |
| ENST00000374155 | RUFY4-002       | ENSG00000188282 | RUFY4         | 5.43 | 2.07 |
| ENST00000493136 | ITIH3-003       | ENSG00000162267 | ITIH3         | 5.15 | 1.66 |

|                 |                 |                  |               |      |      |
|-----------------|-----------------|------------------|---------------|------|------|
| ENST00000382848 | GJB2-001        | ENSG00000165474  | GJB2          | 3.67 | 1.01 |
| ENST00000468624 | MOV10-007       | ENSG00000155363  | MOV10         | 2.81 | 0.32 |
| ENST00000493645 | PARP15-006      | ENSG00000173200  | PARP15        | 4.32 | 2.37 |
| ENST00000449067 | FBXO6-003       | ENSG00000116663  | FBXO6         | 2.95 | 0.40 |
| ENST00000260184 | DDX60L-201      | ENSG00000181381  | DDX60L        | 3.65 | 0.91 |
| ENST00000431231 | ARHGAP23-201    | ENSG00000225485  | ARHGAP23      | 3.69 | 0.73 |
| ENST00000329281 | BLZF1-002       | ENSG00000117475  | BLZF1         | 3.04 | 0.56 |
| ENST00000483055 | NTNG2-005       | ENSG00000196358  | NTNG2         | 4.48 | 1.31 |
| ENST00000373961 | IFI6-202        | ENSG00000126709  | IFI6          | 3.57 | 0.83 |
| ENST00000457488 | DAPK2-001       | ENSG00000035664  | DAPK2         | 4.43 | 1.17 |
| ENST00000353739 | RNF38-002       | ENSG00000137075  | RNF38         | 6.68 | 1.96 |
| ENST00000267838 | LYSMD2-001      | ENSG00000140280  | LYSMD2        | 4.98 | 2.60 |
| ENST00000501838 | AL109616-201    | ENSG00000246147  | AL109616.1    | 3.69 | 0.94 |
| ENST00000369175 | FAM72C-001      | ENSG00000203817  | FAM72C        | 3.18 | 0.56 |
| ENST00000374007 | ASAH2B-002      | ENSG00000204147  | ASAH2B        | 3.38 | 0.70 |
| ENST00000396847 | TRIM5-004       | ENSG00000132256  | TRIM5         | 5.62 | 3.06 |
| ENST00000463000 | WDR86-005       | ENSG00000187260  | WDR86         | 3.95 | 1.22 |
| ENST00000229634 | NCOA7-201       | ENSG00000111912  | NCOA7         | 7.97 | 4.06 |
| ENST00000284110 | HS3ST3A1-001    | ENSG00000153976  | HS3ST3A1      | 4.66 | 1.08 |
| ENST00000330871 | SOCS3-201       | ENSG00000184557  | SOCS3         | 3.64 | 0.84 |
| ENST00000500570 | AC008875-201    | ENSG00000245900  | AC008875.2    | 2.67 | 0.34 |
| ENST00000264832 | ICAM1-201       | ENSG00000090339  | ICAM1         | 3.23 | 0.55 |
| ENST00000393113 | AC073655-201    | ENSG00000213250  | AC073655.1    | 3.11 | 0.57 |
| ENST00000373887 | TRAF1-001       | ENSG00000056558  | TRAF1         | 4.53 | 1.08 |
| ENST00000422211 | CCL3L1-001      | ENSG00000205021  | CCL3L1        | 5.34 | 1.27 |
| ENST00000402854 | RP11-367G6-001  | ENSG00000220517  | RP11-367G6.2  | 3.26 | 0.86 |
| ENST00000444269 | CR1L-201        | ENSG00000197721  | CR1L          | 5.22 | 1.40 |
| ENST00000367808 | BLZF1-001       | ENSG00000117475  | BLZF1         | 3.35 | 0.79 |
| ENST00000315768 | C17orf87-201    | ENSG00000161929  | C17orf87      | 3.89 | 0.85 |
| ENST00000334409 | PDCD1-001       | ENSG00000188389  | PDCD1         | 3.97 | 1.88 |
| ENST00000320578 | RAB39-201       | ENSG00000179331  | RAB39         | 3.37 | 0.91 |
| ENST00000420252 | AC013470-001    | ENSG00000236048  | AC013470.3    | 2.68 | 0.28 |
| ENST00000369159 | HIST2H2AA4-001  | ENSG00000203812  | HIST2H2AA4    | 3.43 | 0.71 |
| ENST00000500836 | AC010319-201    | ENSG00000244887  | AC010319.2    | 2.58 | 0.35 |
| ENST00000409397 | SPATS2L-023     | ENSG00000196141  | SPATS2L       | 7.29 | 2.96 |
| ENST00000455793 | RP11-3D23-001   | ENSG00000236852  | RP11-3D23.1   | 2.41 | 0.20 |
| ENST00000278940 | TMPRSS13-201    | ENSG00000137747  | TMPRSS13      | 5.22 | 2.21 |
| ENST00000473341 | PARP12-002      | ENSG00000059378  | PARP12        | 2.98 | 0.67 |
| ENST00000369161 | HIST2H2AA3-001  | ENSG00000183558  | HIST2H2AA3    | 3.42 | 0.71 |
| ENST00000501526 | AL035530-201    | ENSG00000246620  | AL035530.1    | 3.16 | 0.59 |
| ENST00000322282 | GRAMD1B-201     | ENSG000000023171 | GRAMD1B       | 3.57 | 1.82 |
| ENST00000269209 | FAM59A-002      | ENSG00000141441  | FAM59A        | 5.06 | 2.20 |
| ENST00000311601 | SH3PXD2B-201    | ENSG00000174705  | SH3PXD2B      | 2.78 | 0.51 |
| ENST00000426906 | C22orf28-201    | ENSG00000100220  | C22orf28      | 2.58 | 0.31 |
| ENST00000337387 | WTAP-002        | ENSG00000146457  | WTAP          | 3.04 | 0.57 |
| ENST00000452637 | RP11-403I13-001 | ENSG00000226067  | RP11-403I13.7 | 2.93 | 0.76 |
| ENST00000460961 | CFLAR-024       | ENSG00000003402  | CFLAR         | 2.62 | 0.41 |
| ENST00000256015 | BTG1-201        | ENSG00000133639  | BTG1          | 2.53 | 0.26 |
| ENST00000367054 | SOD2-201        | ENSG00000112096  | SOD2          | 4.80 | 2.72 |
| ENST00000471700 | PSME2-003       | ENSG00000100911  | PSME2         | 2.94 | 0.73 |
| ENST00000357443 | MOV10-005       | ENSG00000155363  | MOV10         | 5.64 | 3.74 |
| ENST00000453033 | RP11-278A16-001 | ENSG00000225131  | RP11-278A16.1 | 2.99 | 0.52 |
| ENST00000268459 | NKD1-001        | ENSG00000140807  | NKD1          | 3.14 | 1.14 |
| ENST00000439871 | IL8RBP-002      | ENSG00000229754  | IL8RBP        | 3.15 | 0.73 |
| ENST00000297977 | HDX-201         | ENSG00000165259  | HDX           | 4.37 | 1.63 |
| ENST00000261366 | LMNB1-001       | ENSG00000113368  | LMNB1         | 2.84 | 0.50 |
| ENST00000279249 | CDC42EP2-201    | ENSG00000149798  | CDC42EP2      | 3.58 | 0.85 |

|                 |                 |                 |               |       |      |
|-----------------|-----------------|-----------------|---------------|-------|------|
| ENST00000502167 | AC145210-202    | ENSG00000247317 | AC145210.1    | 4.26  | 1.44 |
| ENST00000473240 | GCA-013         | ENSG00000115271 | GCA           | 5.42  | 2.36 |
| ENST00000476513 | APOBEC3F-004    | ENSG00000128394 | APOBEC3F      | 3.25  | 0.84 |
| ENST00000369173 | AL358813-201    | ENSG00000203815 | AL358813.2    | 3.18  | 0.90 |
| ENST00000372285 | CD40-001        | ENSG00000101017 | CD40          | 3.17  | 0.69 |
| ENST00000296026 | CXCL3-201       | ENSG00000163734 | CXCL3         | 4.28  | 1.13 |
| ENST00000262510 | NLRC5-001       | ENSG00000140853 | NLRC5         | 2.63  | 0.69 |
| ENST00000378947 | C5orf56-003     | ENSG00000197536 | C5orf56       | 4.02  | 1.38 |
| ENST00000400889 | FAM72D-001      | ENSG00000215784 | FAM72D        | 2.78  | 0.35 |
| ENST00000296414 | DAPP1-201       | ENSG00000070190 | DAPP1         | 2.94  | 0.71 |
| ENST00000435315 | AF127936-001    | ENSG00000226751 | AF127936.4    | 4.52  | 1.86 |
| ENST00000288466 | ZNF618-201      | ENSG00000157657 | ZNF618        | 2.76  | 0.39 |
| ENST00000394613 | PLA2G16-202     | ENSG00000176485 | PLA2G16       | 4.52  | 2.18 |
| ENST00000242351 | ZC3HAV1-001     | ENSG00000105939 | ZC3HAV1       | 3.27  | 0.72 |
| ENST00000300589 | NOD2-001        | ENSG00000167207 | NOD2          | 3.43  | 0.95 |
| ENST00000453177 | RP11-370B11-001 | ENSG00000236739 | RP11-370B11.1 | 2.67  | 0.50 |
| ENST00000367797 | F5-001          | ENSG00000198734 | F5            | 3.36  | 0.74 |
| ENST00000498457 | RP11-292E2-001  | ENSG00000241220 | RP11-292E2.2  | 4.09  | 1.29 |
| ENST00000454907 | RP3-497J21-001  | ENSG00000235008 | RP3-497J21.1  | 4.62  | 1.75 |
| ENST00000435374 | MAP2K6-202      | ENSG00000108984 | MAP2K6        | 4.95  | 2.18 |
| ENST00000290349 | CBR1-001        | ENSG00000159228 | CBR1          | 2.44  | 0.19 |
| ENST00000255688 | RARRES3-201     | ENSG00000133321 | RARRES3       | 6.03  | 3.15 |
| ENST00000255465 | CCNA1-001       | ENSG00000133101 | CCNA1         | 5.65  | 3.15 |
| ENST00000330243 | IRF7-001        | ENSG00000185507 | IRF7          | 3.57  | 1.14 |
| ENST00000354115 | IL1RN-002       | ENSG00000136689 | IL1RN         | 3.28  | 0.72 |
| ENST00000501717 | AC061992-201    | ENSG00000245152 | AC061992.4    | 3.52  | 0.96 |
| ENST00000416879 | AC010930-201    | ENSG00000225101 | AC010930.2    | 3.88  | 0.87 |
| ENST00000446848 | SNX10-201       | ENSG00000086300 | SNX10         | 3.23  | 0.68 |
| ENST00000382215 | AC233309-201    | ENSG00000205885 | AC233309.1    | 3.80  | 1.21 |
| ENST00000265807 | SH2D4A-001      | ENSG00000104611 | SH2D4A        | 3.59  | 1.03 |
| ENST00000368121 | DARC-002        | ENSG00000213088 | DARC          | 4.44  | 1.79 |
| ENST00000453010 | C9orf109-001    | ENSG00000231528 | C9orf109      | 2.46  | 0.29 |
| ENST00000227752 | IL10RA-201      | ENSG00000110324 | IL10RA        | 2.61  | 0.37 |
| ENST00000258534 | DRAM1-201       | ENSG00000136048 | DRAM1         | 2.37  | 0.40 |
| ENST00000454730 | HPSE-201        | ENSG00000173083 | HPSE          | 2.93  | 0.56 |
| ENST00000355338 | WARS-202        | ENSG00000140105 | WARS          | 6.85  | 4.88 |
| ENST00000316043 | AC007536-201    | ENSG00000176654 | AC007536.1    | 4.44  | 1.28 |
| ENST00000499282 | AL160471-201    | ENSG00000246064 | AL160471.2    | 3.37  | 1.04 |
| ENST00000368089 | KCNJ10-001      | ENSG00000177807 | KCNJ10        | 5.11  | 1.33 |
| ENST00000302035 | SLAMF1-001      | ENSG00000117090 | SLAMF1        | 5.08  | 1.86 |
| ENST00000452222 | RP11-428O18-001 | ENSG00000230641 | RP11-428O18.1 | 5.27  | 1.84 |
| ENST00000436911 | TRGC2-001       | ENSG00000227191 | TRGC2         | 3.19  | 0.88 |
| ENST00000464885 | BCL2L14-004     | ENSG00000121380 | BCL2L14       | 5.76  | 1.55 |
| ENST00000413796 | AC002511-001    | ENSG00000233214 | AC002511.4    | 3.95  | 1.05 |
| ENST00000231228 | IL12B-001       | ENSG00000113302 | IL12B         | 4.71  | 1.55 |
| ENST00000367089 | DYNLT1-001      | ENSG00000146425 | DYNLT1        | 2.29  | 0.22 |
| ENST00000450096 | PNPT1-201       | ENSG00000138035 | PNPT1         | 3.42  | 2.34 |
| ENST00000374291 | STMN1-005       | ENSG00000117632 | STMN1         | -3.19 | 0.95 |
| ENST00000441742 | AC115284-201    | ENSG00000233341 | AC115284.1    | -2.64 | 0.46 |
| ENST00000393203 | PTGFRN-001      | ENSG00000134247 | PTGFRN        | -3.17 | 0.93 |
| ENST00000393423 | RGL3-203        | ENSG00000205517 | RGL3          | -4.06 | 2.54 |
| ENST00000361170 | IQGAP3-001      | ENSG00000183856 | IQGAP3        | -2.95 | 0.68 |
| ENST00000330777 | AC068353-201    | ENSG00000182319 | AC068353.1    | -2.40 | 0.41 |
| ENST00000270645 | RCN3-201        | ENSG00000142552 | RCN3          | -3.20 | 0.79 |
| ENST00000396123 | GREB1-209       | ENSG00000196208 | GREB1         | -2.81 | 0.45 |
| ENST00000464213 | CD36-014        | ENSG00000135218 | CD36          | -7.77 | 5.32 |
| ENST00000225538 | P2RX1-201       | ENSG00000108405 | P2RX1         | -2.62 | 0.35 |

|                 |                |                 |              |       |      |
|-----------------|----------------|-----------------|--------------|-------|------|
| ENST00000490823 | KHK-003        | ENSG00000138030 | KHK          | -3.74 | 1.56 |
| ENST00000329099 | FAM101B-001    | ENSG00000183688 | FAM101B      | -2.49 | 0.23 |
| ENST00000342032 | C7orf16-001    | ENSG00000106341 | C7orf16      | -4.44 | 1.19 |
| ENST00000455981 | RP11-344B5-001 | ENSG00000224307 | RP11-344B5.3 | -4.20 | 1.16 |
| ENST00000319340 | CHST13-201     | ENSG00000180767 | CHST13       | -2.76 | 0.50 |
| ENST00000354698 | ZNF589-001     | ENSG00000164048 | ZNF589       | -3.69 | 2.21 |
| ENST00000402125 | PROC-012       | ENSG00000115718 | PROC         | -3.62 | 1.24 |
| ENST00000481799 | GGTA1-005      | ENSG00000204136 | GGTA1        | -3.46 | 1.20 |
| ENST00000501995 | AL139158-201   | ENSG00000244884 | AL139158.1   | -3.60 | 1.27 |
| ENST00000453888 | PARVG-204      | ENSG00000138964 | PARVG        | -3.03 | 0.48 |
| ENST00000409345 | ADRA2B-001     | ENSG00000222040 | ADRA2B       | -3.80 | 0.69 |
| ENST00000241356 | ADORA3-010     | ENSG00000121933 | ADORA3       | -4.18 | 1.20 |
| ENST00000276420 | DOK2-001       | ENSG00000147443 | DOK2         | -3.38 | 0.62 |
| ENST00000373176 | AK1-008        | ENSG00000106992 | AK1          | -3.13 | 0.53 |
| ENST00000494322 | SLC11A1-010    | ENSG00000018280 | SLC11A1      | -5.26 | 3.43 |
| ENST00000299164 | ADAMTS15-201   | ENSG00000166106 | ADAMTS15     | -4.39 | 1.22 |
| ENST00000468508 | SLC19A1-011    | ENSG00000173638 | SLC19A1      | -4.36 | 1.66 |
| ENST00000388827 | CCDC152-202    | ENSG00000198865 | CCDC152      | -5.46 | 2.60 |
| ENST00000377008 | C1orf127-001   | ENSG00000175262 | C1orf127     | -4.66 | 1.90 |
| ENST00000339788 | DAB2-202       | ENSG00000153071 | DAB2         | -6.74 | 4.76 |
| ENST00000413146 | TNFRSF8-202    | ENSG00000120949 | TNFRSF8      | -4.61 | 1.77 |
| ENST00000331664 | C2orf71-001    | ENSG00000179270 | C2orf71      | -3.84 | 1.13 |
| ENST00000374292 | STMN1-006      | ENSG00000117632 | STMN1        | -4.91 | 2.24 |
| ENST00000318430 | TMC8-202       | ENSG00000167895 | TMC8         | -3.20 | 0.52 |
| ENST00000264741 | ITGA9-001      | ENSG00000144668 | ITGA9        | -5.72 | 1.51 |
| ENST00000335281 | GNG2-201       | ENSG00000186469 | GNG2         | -4.06 | 1.16 |
| ENST00000248706 | RASL11B-001    | ENSG00000128045 | RASL11B      | -3.21 | 0.38 |
| ENST00000377103 | THBD-001       | ENSG00000178726 | THBD         | -4.78 | 1.03 |
| ENST00000311124 | SLC19A1-001    | ENSG00000173638 | SLC19A1      | -3.55 | 0.86 |
| ENST00000367460 | RGS18-001      | ENSG00000150681 | RGS18        | -4.77 | 1.40 |
| ENST00000423345 | PRAM1-202      | ENSG00000133246 | PRAM1        | -4.31 | 2.74 |
| ENST00000442811 | AC104809-002   | ENSG00000226321 | AC104809.2   | -5.10 | 1.25 |
| ENST00000479024 | NT5DC2-004     | ENSG00000168268 | NT5DC2       | -7.43 | 1.77 |
| ENST00000318074 | SYTL1-001      | ENSG00000142765 | SYTL1        | -4.85 | 1.55 |
| ENST00000502226 | AL033528-201   | ENSG00000247440 | AL033528.1   | -5.17 | 1.81 |
| ENST00000399815 | IFITM1-202     | ENSG00000185885 | IFITM1       | -4.63 | 0.66 |
| ENST00000438506 | AC104809-003   | ENSG00000233392 | AC104809.3   | -4.79 | 0.85 |
| ENST00000356289 | AMICA1-202     | ENSG00000160593 | AMICA1       | -4.27 | 0.77 |
| ENST00000221347 | FCGBP-201      | ENSG00000090920 | FCGBP        | -4.26 | 0.73 |
| ENST00000430980 | AC104809-201   | ENSG00000226321 | AC104809.2   | -5.29 | 1.13 |
| ENST00000294435 | RBP7-001       | ENSG00000162444 | RBP7         | -5.97 | 1.59 |
| ENST00000216180 | PNPLA3-001     | ENSG00000100344 | PNPLA3       | -5.95 | 2.12 |
| ENST00000427494 | APOBEC3D-202   | ENSG00000243811 | APOBEC3D     | -4.35 | 0.38 |
| ENST00000441301 | F13A1-203      | ENSG00000124491 | F13A1        | -6.73 | 2.01 |
| ENST00000246006 | CD93-002       | ENSG00000125810 | CD93         | -6.21 | 1.30 |
| ENST00000428281 | FCGBP-202      | ENSG00000090920 | FCGBP        | -5.45 | 1.54 |
| ENST00000412757 | DPEP2-203      | ENSG00000167261 | DPEP2        | -7.10 | 1.44 |
| ENST00000418218 | AC104809-002   | ENSG00000233392 | AC104809.3   | -6.38 | 1.32 |
| ENST00000501836 | AC067945-201   | ENSG00000245033 | AC067945.2   | -7.60 | 0.87 |
| ENST00000251507 | RABGAP1L-001   | ENSG00000152061 | RABGAP1L     | -7.66 | 0.55 |
| ENST00000391824 | NUP62-202      | ENSG00000213024 | NUP62        | -8.25 | 0.48 |
